# Supplementary material for: Lung Injury Prevention with Aspirin (LIPS-A): a protocol for a multicentre randomised clinical trial in medical patients at high risk of acute lung injury
Source: PubMed Central journal article supplement — BMJ Open. 2012 Sep 4;2(5):e001606. doi: 10.1136/bmjopen-2012-001606 (PMC3437429; doi:10.1136/bmjopen-2012-001606), 2012-09-04
Supplement: bmjopen-2012-001606.draft_revisions.pdf [file bmjopen-2012-001606.draft_revisions.pdf]

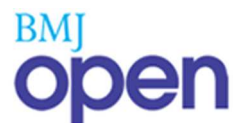

## Lung Injury Prevention with Aspirin: Methodology for a Multicenter Randomized Clinical Trial

|                                 |                                                                                                                                                                                                                                                                                                                                                                                                                                                                                                                             |
|---------------------------------|-----------------------------------------------------------------------------------------------------------------------------------------------------------------------------------------------------------------------------------------------------------------------------------------------------------------------------------------------------------------------------------------------------------------------------------------------------------------------------------------------------------------------------|
| Journal:                        | <i>BMJ Open</i>                                                                                                                                                                                                                                                                                                                                                                                                                                                                                                             |
| Manuscript ID:                  | bmjopen-2012-001606                                                                                                                                                                                                                                                                                                                                                                                                                                                                                                         |
| Article Type:                   | Protocol                                                                                                                                                                                                                                                                                                                                                                                                                                                                                                                    |
| Date Submitted by the Author:   | 04-Jun-2012                                                                                                                                                                                                                                                                                                                                                                                                                                                                                                                 |
| Complete List of Authors:       | Kor, Daryl; Mayo Clinic, Anesthesiology & Critical Care<br>Talmor, Daniel; Beth Israel Deaconess Medical Center, Anesthesiology & Critical Care<br>Banner-Goodspeed, Valerie; Beth Israel Deaconess Medical Center, Anesthesiology & Critical Care<br>Carter, Rickey; Mayo Clinic, Biomedical Statistics and Informatics<br>Hinds, Richard; Mayo Clinic, Anesthesiology<br>Park, Pauline; University of Michigan, Surgery<br>Gong, Michelle; Montefiore Medical Center, Pulmonary & Critical Care Medicine<br>Ognjen, Gajic |
| <b>Primary Subject Heading</b>: | Research methods                                                                                                                                                                                                                                                                                                                                                                                                                                                                                                            |
| Secondary Subject Heading:      | Respiratory medicine                                                                                                                                                                                                                                                                                                                                                                                                                                                                                                        |
| Keywords:                       | acute lung injury, acute respiratory distress syndrome, aspirin, critical illness, prevention, clinical trial                                                                                                                                                                                                                                                                                                                                                                                                               |
|                                 |                                                                                                                                                                                                                                                                                                                                                                                                                                                                                                                             |

SCHOLARONE™  
Manuscripts

only

For submission to: BMJ Open

6-4-2012

A/Groups/CCS/Robin/Kor/Manuscript/Aspirin Therapy in ALI/lung injury prevention with aspirin\_MBJOpen.docx

## LUNG INJURY PREVENTION WITH ASPIRIN: METHODOLOGY FOR A MULTICENTER RANDOMIZED CLINICAL TRIAL

Daryl J. Kor, MD, Assistant Professor of Anesthesiology, Mayo Clinic College of Medicine, Rochester, MN

Daniel S. Talmor MD, MPH, Associate Professor of Anesthesiology, Harvard Medical School, Boston, MA

Valerie M. Banner-Goodspeed, ALB, Clinical Trial Specialist, Beth Israel Deaconess Medical Center, Boston, MA

Rickey E. Carter, PhD, Associate Professor of Biostatistics, Mayo Clinic College of Medicine, Rochester, MN

Richard Hinds, BS, MS, RRT; Department of Anesthesiology, Mayo Clinic, Rochester, MN

Pauline K. Park, MD, Associate Professor of Surgery, University of Michigan School of Medicine, Ann Arbor, MI

Ognjen Gajic, MD, MSc, FCCP, FCCM, Professor of Medicine, Mayo Clinic College of Medicine, Rochester, MN

Michelle N. Gong MD, MS, Associate Professor of Medicine, Albert Einstein College of Medicine, Bronx, NY

On behalf of the US Critical Illness and Injury Trials Group: Lung Injury Prevention with Aspirin Study Group (USCIITG: LIPS-A).

This study is supported by Grant Numbers U01-HL108712-01, KL2 RR024151, and the Mayo Clinic Critical Care Research Committee. This protocol is registered with ClinicalTrials.gov, registration number NCT01504867.

**Keywords:** acute lung injury, acute respiratory distress syndrome, aspirin, critical illness, prevention, clinical trial.

**Word Count:**

Address correspondence requests to:

Daryl J. Kor, M.D.  
Mayo Clinic, 200 First Street SW  
Rochester, MN 55905  
507-255-6051 / Fax 507-255-4267  
[kor.daryl@mayo.edu](mailto:kor.daryl@mayo.edu)

## ABSTRACT

**Introduction:** The acute respiratory distress syndrome (ARDS) and the less severe acute lung injury (ALI) are devastating conditions that place a heavy burden on public health resources. Although the need for effective ALI prevention strategies has been increasingly recognized, no effective preventative strategies presently exist. The Lung Injury Prevention Study with Aspirin (LIPS-A) aims to test whether aspirin (ASA) administration could prevent and/or mitigate the development of ALI in patients determined to be at high risk for this life-threatening complication.

**Methods and Analysis:** LIPS-A is a multicenter, double-blind, phase II randomized clinical trial which aims to test the hypothesis that the early administration of ASA will be associated with a reduced incidence of ALI during the first seven days following hospital admission of adult patients at high risk for ALI. It is anticipated that this investigation will enroll 400 total study participants from 14 hospitals across the United States. Conditional logistic regression will be used to test the primary hypothesis that early ASA administration will decrease the rate of ALI development. A planned interim analysis will be conducted at 50% of study participants enrolled.

**Ethics and Dissemination:** Safety oversight will be under the direction of a data safety and monitoring board whose members will be independent from the study operations. Safety endpoints will be examined for all eligible patients who sign informed consent and are enrolled in the study on an intent-to-treat basis.

In addition to providing important clinical and mechanistic study results, the findings of this investigation will be informative on the scientific merit and feasibility of a phase III trial on the role of aspirin as an ALI prevention agent. The LIPS-A group will also encourage

1  
2  
3  
4  
5  
6  
7  
8  
9  
10  
11  
12  
13  
14  
15  
16  
17  
18  
19  
20  
21  
22  
23  
24  
25  
26  
27  
28  
29  
30  
31  
32  
33  
34  
35  
36  
37  
38  
39  
40  
41  
42  
43  
44  
45  
46  
47  
48  
49  
50  
51  
52  
53  
54  
55  
56  
57  
58  
59  
60

investigator-initiated ancillary study proposals that extend or complement the specific aims of the primary LIPS-A trial.

For peer review only

## INTRODUCTION

Acute lung injury (ALI) and the acute respiratory distress syndrome (ARDS) are life-threatening syndromes which continue to consume substantial health care resources and profoundly impact patient-important outcomes.[1] Although recent epidemiologic studies suggest the incidence of lung injury may be on the decline,[2] even conservative estimates suggest the associated mortality continues to exceed 25%.[3] Beyond mortality, an episode of ALI/ARDS also substantially influences patient's long-term outcomes with functional deficits persisting up to five years after the episode of respiratory failure.[4]

Importantly, the clinical syndrome of ALI generally occurs as a complication of an initial predisposing acute injury such as pneumonia, aspiration, sepsis, trauma, shock, or massive transfusion.[5] However, only a fraction of patients (10-30%) with these initial injuries develop ALI/ARDS.[6, 7] Only 30% of ALI patients fulfill criteria for ALI within six hours of presentation to the emergency department (ED).[8] The majority of patients develop ALI a median of two days after hospital presentation (IQR 1-4 days). This period of time between hospital presentation and development of ALI presents a window of opportunity for interventions to prevent the development of ALI.

Recently, accumulating evidence suggests an important role for platelets in both ALI pathogenesis [9-11] and resolution.[12-14] Notably, preclinical data suggests that aspirin (ASA) can modulate many of the platelet-mediated processes involved in ALI development [11, 15, 16] and resolution.[17, 18] Proposed mechanisms for these protective effects include reduced thromboxane A<sub>2</sub>,[9] P-selectin,[19] and platelet-derived chemokine (e.g. CCL5, CXCL4) [20] production, prevention of the formation of platelet-neutrophil aggregates[9] and neutrophil extracellular traps,[21, 22] and enhanced formation of anti-inflammatory lipid mediators such as

1  
2  
3 15-epi-lipoxin A4 (Figure 1).[17] Importantly, recent observational studies have also suggested  
4 a potential preventive role for antiplatelet therapy in patients at high risk for ALI.[23, 24]  
5  
6 However, the evidence remains inconclusive and equipoise remains.  
7  
8  
9

10 To further enhance our understanding of ASA's role in the prevention and/or mitigation  
11 of ALI, the Lung Injury Prevention Study (LIPS) group with the support of the United States  
12 Critical Illness and Injury Trials Group (USCIITG) as well as the National Heart, Lung and  
13 Blood Institute (NHLBI) have designed the Lung Injury Prevention Study with Aspirin (LIPS-  
14 A), a randomized clinical trial that aims to test the safety and efficacy of ASA in the prevention  
15 of ALI in patients determined to be at high risk. This paper describes the study procedures and  
16 planned analyses for this clinical trial.  
17  
18  
19  
20  
21  
22  
23  
24  
25

## 26 **METHODS AND ANALYSIS**

### 27 **Administrative Structure**

28  
29 To facilitate the conduct of the present investigation, as well as future ALI prevention  
30 studies, three specialized centers were established. The data and statistical coordinating center,  
31 responsible for data management, randomization, and pharmacy coordination, will reside at  
32 Mayo Clinic in Rochester, MN. The clinical coordinating center (CCC), responsible for the  
33 study conduct and safety monitoring, will reside at Beth Israel Deaconess Medical Center in  
34 Boston, MA. The biospecimen repository and Knowledge Translation Center, responsible for  
35 specimen management as well as the LIPS score and the checklist for lung injury prevention  
36 (CLIP) online screening tools, will reside at Montefiore Medical Center in Bronx, NY. The  
37 principal investigators from these three centers form the LIPS-A Executive Committee. This  
38 committee will collaboratively oversee all aspects of the study design and the protocol  
39 implementation.  
40  
41  
42  
43  
44  
45  
46  
47  
48  
49  
50  
51  
52  
53  
54  
55  
56  
57  
58  
59  
60

## Study Design

To test the hypothesis that ASA is associated with a reduced rate of incident ALI, the LIPS-A group has designed a multicenter, double-blind, placebo-controlled, parallel group, phase II randomized clinical trial. The ClinicalTrials.gov registration number is NCT01504867. An outline of the study design and study procedures appears in Figure 2.

## Study Population

Adult patients aged 18 years and older at high risk for ALI on admission to the hospital will be enrolled. To facilitate the identification of those at high risk for ALI, the LIPS-A study will utilize the recently validated LIPS.[8] Patients will be considered at high risk for development of ALI based on a LIPS score of 4 or greater. Patients who fulfill criteria for ALI on hospital presentation or at any point prior to randomization will be excluded. A full list of exclusion criteria with the justification for each can be seen in Table 1.

Patients will be recruited from 14 clinical sites in the United States with experience in the identification and management of ALI. A full list of the participating institutions as well as each site's primary investigator can be seen in Appendix A and are indexed on ClinicalTrials.gov. The resulting study population is expected to be diverse and representative of the general population of patients at risk for ALI such that the study findings will be externally valid and generalizable to the broader academic community.

To facilitate patient enrollment, study coordinators at each participating institution will screen patients in the ED with a web-based LIPS calculator to determine each potential participant's risk for development of ALI. Eligible patients with a LIPS score  $\geq 4$  will be approached by study coordinators or study investigators for informed consent. Eligible patients will be enrolled and randomized within 12 hours of hospital presentation. This will allow for

1  
2  
3 maximal recruitment within the window of opportunity for interventions to prevent ALI  
4  
5 development as our preliminary data show median time to ALI is two days after hospital  
6  
7 admission.[8]  
8  
9

## 10 **Interventions**

11  
12 Study drug: The first dose of study drug (ASA versus placebo) will be administered  
13  
14 within the first 24 hours after presentation to the hospital, either by mouth or by nasogastric or  
15  
16 orogastric tube. For patients randomized to the intervention arm, a generic aspirin 325 mg one-  
17  
18 time loading dose on day 1 will be administered followed by generic aspirin 81 mg by mouth  
19  
20 once daily for study days 2-7 or until hospital discharge or death, whichever occurs first. The  
21  
22 intervention duration of seven days was chosen because > 85% of ALI/ARDS cases were noted  
23  
24 to have developed during this time frame in our preliminary studies.[8] In support of the dosing  
25  
26 scheme chosen for this investigation, a randomized clinical trial noted low-dose ASA at 81 mg  
27  
28 daily was effective in elevating plasma levels of anti-inflammatory lipoxins and inhibiting  
29  
30 platelet thromboxane activity with only a slight increase in effect at higher doses of ASA.[25, 26]  
31  
32  
33 All study medication doses (active treatment with ASA and placebo) will be in powder form of  
34  
35 identical color, contained within capsules that can be opened and administered via a gastric tube.  
36  
37  
38

39  
40 Co-interventions: Important co-interventions will be standardized in all study patients.  
41  
42 To this end, the investigative team has developed a web-based, computerized, interactive tool to  
43  
44 standardize essential elements of care delivery such as mechanical ventilation, aspiration  
45  
46 precautions, infection control, fluid management and transfusion in patients at risk. This tool is a  
47  
48 checklist for lung injury prevention (CLIP).[2] A summary of the CLIP elements is listed in  
49  
50 Table 2. Having identified high-risk patients early in the course of the illness with the LIPS  
51  
52 calculation and having standardized the important elements of care delivery with the CLIP, we  
53  
54  
55  
56  
57  
58  
59  
60



1  
2  
3 expect to have optimized our ability to investigate whether ASA is a safe and effective agent in  
4 preventing ALI.  
5  
6

7  
8 Related conditions and variables of interest: Additional conditions and variables of  
9 interest including pertinent baseline demographics and clinical characteristics such as age, sex,  
10 race, comorbidities, and all LIPS elements will also be recorded. Additional variables of note  
11 will include vital signs and laboratory values that are obtained during the course of routine care,  
12 APACHE IV scores, coadministration of statins, angiotensin converting enzyme-inhibitors and  
13 angiotensin-receptor blocking agents, insulin, amiodarone, or steroids; blood product  
14 administration, daily fluid status and vasopressor requirements. A full description of the  
15 schedule of events for this study protocol can be seen in Table 3.  
16  
17  
18  
19  
20  
21  
22  
23  
24  
25

## 26 27 **Outcomes**

28  
29 Clinical Outcomes: The primary outcome is the development of ALI within seven days  
30 of hospital admission. ALI will be defined as requirement for invasive mechanical ventilation  
31 and fulfillment of the American-European consensus definition for ALI/ARDS.[27] Patients will  
32 be screened daily for respiratory failure and the partial pressure of arterial oxygen (PaO<sub>2</sub>) to  
33 fraction of inspired oxygen (FiO<sub>2</sub>) ratio will be calculated daily for those on mechanical  
34 ventilation. Patients ventilated with non-invasive ventilation will not be considered ALI/ARDS  
35 as our preliminary data showed that the majority (90%) of ALI patients are eventually  
36 intubated.[8] Investigators at each site will review structured online training for assessment of  
37 ALI as was used and described in the LIPS.[8] In addition, de-identified chest x-rays of the first  
38 five patients enrolled at each site will be sent to CCC for validation by the primary investigators.  
39 Any site with significant deviation will be re-trained. Each participating center's principal  
40 investigator will adjudicate the diagnosis of ALI/ARDS using standardized definitions. Patients  
41  
42  
43  
44  
45  
46  
47  
48  
49  
50  
51  
52  
53  
54  
55  
56  
57  
58  
59  
60

1  
2  
3 receiving invasive mechanical ventilation who, within a given 24-hour period, fulfill criteria for  
4  
5 PaO<sub>2</sub>/FiO<sub>2</sub> < 300 mm Hg, bilateral infiltrates consistent with ALI and not completely explained  
6  
7 by heart failure, will be determined to have developed ALI. Given prior data suggesting poor  
8  
9 agreement in the radiological interpretation of bilateral infiltrates on chest radiographs consistent  
10  
11 with ALI,[28] a secondary review of all ALI cases and a random sample of non-ALI cases will  
12  
13 be performed by an independent expert investigator who is blinded to the initial ALI/ARDS  
14  
15 adjudication. Study participants who die or are discharged from the hospital prior to day 7, and  
16  
17 had not met criteria for ALI at the time of death or discharge, will be adjudicated as not having  
18  
19 developed ALI.  
20  
21  
22  
23

24  
25 Secondary clinical outcome assessments will include changes in the lung injury score and  
26  
27 sequential organ failure assessment score, as well as the number of ventilator-free days at  
28  
29 hospital day 28 and intensive care unit (ICU) and hospital lengths of stay. Mortality will be  
30  
31 assessed at discharge from the ICU, from the hospital, and at 28 days. In addition, hospital  
32  
33 survivors will undergo a brief follow-up phone survey to assess functional status (Barthel Index),  
34  
35 health related quality of life [QOL (SF-12)] and frailty (VES-13) at 6- and 12-months after  
36  
37 enrollment.  
38  
39

40  
41 Mechanistic Outcomes: Secondary analyses will include evaluations of the mechanisms  
42  
43 by which anti-platelet agents (e.g., ASA) may modulate the development and progression of lung  
44  
45 injury as well as a determination of the value of plasma biomarkers of lung injury in the  
46  
47 prediction of ALI development in patients at risk (beyond clinical variables). The study will  
48  
49 examine biomarkers previously found to be associated with the *development* of ALI/ARDS in at-  
50  
51 risk individuals (Table 4). In addition, to better understand the mechanisms by which ASA may  
52  
53 affect the development and progression of ALI, the study will also examine the effect of ASA on  
54  
55  
56  
57  
58  
59  
60

1  
2  
3 ASA-triggered lipoxins, plasma thromboxane, and platelet-neutrophil aggregates. As it is likely  
4 that other important biomarkers in ALI may be identified in the future, plasma from consenting  
5 patients will be banked at the biorepository for future studies. Blood samples will be obtained at  
6 baseline (after randomization and before initiation of study intervention), on day two of study  
7 (approximately 24 hours after the first dose of study drug), and on day four of study (any time  
8 during day 4). For patients who provide consent relating to future genetic analyses, appropriate  
9 samples will be obtained.  
10  
11  
12  
13  
14  
15  
16  
17  
18  
19

### 20 **Sample Size Estimation**

21  
22 The primary hypothesis for this investigation is that ASA (when compared to placebo)  
23 will result in a lower rate of incident ALI at day 7 following randomization. To adequately  
24 address this hypothesis, the sample size is estimated to be 200 participants per group (400 total).  
25 The assumptions involved in this calculation include the following: 1) the hypothesized placebo  
26 response rate will be 18%,<sup>[8]</sup> 2) the minimum clinically relevant effect is 10 percentage points,  
27 and 3) the type I error rate ( $\alpha$ ) = 0.10 (two-sided) (final  $\alpha$ =0.0889 after interim analysis  
28 at 50% information fraction using O'Brien-Fleming-like alpha spending function). To be  
29 conservative during sample size estimation, the null proportion was shifted upwards to 25% (i.e.,  
30 towards the region of maximum binomial variance) so that the initial sample size estimates are  
31 based on 25% vs. 15%. A chi-square test of proportions at the  $\alpha$  = 0.10 level of significance  
32 will have 80% power to detect the 10 percentage point difference with 197 participants per  
33 group. Overall recruitment is rounded to 200 participants per group (400 total) to allow for  
34 minor attrition, although attrition is not expected to affect the ascertainment of primary outcome.  
35 At the hypothesized level of 18% vs. 8% and with the alpha adjusted for multiple interim looks,  
36 power with 200 participants per group is 90%. Thus, for the primary analysis 400 total  
37  
38  
39  
40  
41  
42  
43  
44  
45  
46  
47  
48  
49  
50  
51  
52  
53  
54  
55  
56  
57  
58  
59  
60

1  
2  
3 participants randomized 1:1 to placebo or ASA is anticipated to yield sufficient power to detect a  
4  
5 clinically relevant difference in the incidence of ALI.  
6  
7

### 8 **Randomization and Blinding**

9  
10 Eligible participants will be randomized in a 1:1 ratio to the ASA or placebo treatment  
11  
12 arm using dynamic minimization[29] with a second guess probability of 0.2. Randomization  
13  
14 will be stratified by center, and the research pharmacist at each center will have electronic access  
15  
16 to the unblinded treatment code for study medication preparation and dispensing. The rest of the  
17  
18 site investigators and coordinating centers will be blinded to the actual treatment assignment  
19  
20  
21 Emergency unblinding is available both electronically and through dispensing records at each  
22  
23 pharmacy.  
24  
25

### 26 **Statistical Methods**

27  
28  
29 Conditional logistic regression will be used to test the primary hypothesis that early ASA  
30  
31 administration will decrease the rate of ALI development. Clinical site will be treated as the  
32  
33 stratification variable and conditioned out of the estimating equations. This approach is optimal  
34  
35 in a clinical trial setting as it provides a test of null hypothesis that the ALI incidence is equal in  
36  
37 the two treatment group and estimates the association in the event the null hypothesis is rejected  
38  
39 (through the conditional odds ratio estimate). SAS PROC LOGISTIC™ (Cary, NC) will be used  
40  
41 for estimation of the primary model.  
42  
43  
44

45  
46 This analysis will be supplemented by the Cochran-Mantel-Haenszel stratified analysis  
47  
48 with odds ratios computed for each site. The Breslow-Day test will be used to examine the data  
49  
50 for potential effect modification (i.e., a “site effect”). In the event there is significant site-to-site  
51  
52 variability in the estimated effect, stratified results will be reported for this phase II study.  
53  
54  
55  
56  
57  
58  
59  
60

1  
2  
3 Evidence of heterogeneity of response at this phase of the study will yield invaluable preliminary  
4 data for the planning of future changes.  
5  
6  
7

8  
9  
10  
11  
12  
13  
14  
15  
16  
17  
18  
19  
20  
21  
22  
23  
24  
25  
26  
27  
28  
29  
30  
31  
32  
33  
34  
35  
36  
37  
38  
39  
40  
41  
42  
43  
44  
45  
46  
47  
48  
49  
50  
51  
52  
53  
54  
55  
56  
57  
58  
59  
60  
Planned interim analyses will be conducted at 50% of study participants enrolled. With the O'Brien-Fleming-like stopping boundaries, a final adjusted alpha of 0.08885 is anticipated; however, the final value may be changed depending on unplanned interim analyses (conducted at the request of the Data Safety Monitoring Board [DSMB]) or slight deviations from the anticipated information milestones (0.50, 1.0). Stopping boundaries will be estimated using the LD Bounds package for the R system.

For the remaining continuous and dichotomous secondary endpoints, treatment group comparisons will be performed with respect to clinical outcomes as well as important prognostic factors at screening, baseline, and individual follow-up time points during the study duration. For continuous variables (e.g., age, weight, and laboratory assays), linear model techniques including *t*-tests, analysis of variance and analysis of covariance will be applied. Nonparametric procedures (e.g., the Wilcoxon rank sum test), will be used if data are not normally distributed and transformations of the data are not considered useful. Standard techniques for categorical data will be applied, including Fisher's exact test, Pearson  $\chi^2$  procedures, weighted least squares, and logistic regression analysis.

Longitudinal (or serially measured) endpoints will be evaluated by generalized linear models and linear mixed. Repeated measure analyses of binary endpoints will be analyzed using generalized estimating equations methods which do not require imputation of missing values, provided the data are ignorable missing.[30] Continuous dependent variables will utilize the mixed model approach with emphasis on evaluating the trajectories of values over time.

However, early improvement in these parameters may suggest a supportive, stabilizing role for

1  
2  
3 ASA as a treatment option in patients at high risk of ALI. For the primary analysis, the clinical  
4 center will be treated as a “nuisance” parameter and conditioned out of the estimation routine.  
5  
6 For secondary analyses, the clinical center will be used as a fixed covariate to account for  
7  
8 differences across sites.  
9  
10

11  
12  
13 The safety endpoints (see below under “**Adverse Outcomes**”) will be examined for all  
14 participants in the safety evaluable analysis set. Safety endpoints will include expected clinical  
15 events, including death, for this patient population and summarized by treatment group. Also, all  
16 serious and unexpected adverse events will be summarized by treatment group. Fisher’s exact  
17 test will be used to estimate treatment differences in the incidence of each specified adverse  
18 event. No adjustments will be made for multiple hypothesis evaluations of safety endpoints.  
19  
20 Adverse events will be summarized with groupings by body system. Other safety data (e.g., labs  
21 and assay data) will be listed, and when appropriate, summarized in tabular or graphical format.  
22  
23  
24  
25  
26  
27  
28  
29  
30  
31

### 32 **Data Quality and Management**

33  
34  
35 This investigation will utilize the Medidata Rave™ system for data management and  
36 storage as well as to assist with the randomization procedures. This product has been designed  
37 to facilitate multicenter clinical trials conducted under 21 CFR Part 11 requirements. This  
38 secure, web-based system provides robust data validation routines, custom reporting and  
39 straightforward integration with statistical software packages such as SAS (utilized for this  
40 investigation). The system is coupled with an integrated randomization module that uses a  
41 multidimensional dynamic allocation algorithm to minimize imbalances across multiple  
42 dimensions including overall study, sites, factors and cross-factor strata. Specific details  
43 regarding the randomization process are given below.  
44  
45  
46  
47  
48  
49  
50  
51  
52  
53  
54  
55  
56  
57  
58  
59  
60

## ETHICS AND DISSEMINATION

### Adverse Outcomes

Safety data including adverse events such as gastrointestinal ulcers, bleeding from any site, gastrointestinal discomfort, wheezing, rash, hives, angioedema, tinnitus, and mortality will be recorded. Adverse events will be defined as “unexpected,” “expected,” and “serious.” As our patient population is by definition “critically ill,” it is expected that they will have a number of unrelated adverse health events during the course of their hospital stay. Therefore, we will limit the scope of our adverse event monitoring and recording to the following:

1) Serious adverse events (SAEs) will be defined as:

- Death, *believed to be related to the study medication or procedures, or a death that is unexpected considering the acuity of a patient.*
- A life threatening experience *believed to be related to the study medication or procedures*
- Persistent or significant disability or incapacity *that is of greater frequency or severity than what would be normally expected in the course of critical illness.*
- An event that jeopardizes the human subject and may require medical or surgical treatment to prevent one of the preceding outcomes *and is not expected in the course of critical illness.*

2) Adverse events possibly related to aspirin administration will be defined as:

- Anaphylaxis / allergic reaction
- Gastrointestinal bleed / bleeding complications
- Transfusion requirements for suspected bleeding

- Acute kidney injury, defined as RIFLE stage “I” or greater
- Tinnitus
- Reye’s syndrome

### **Role of the Data Safety and Monitoring Board**

Reporting of SAEs will be conducted through the CCC. All centers will report SAEs within 24 hours of discovering the presence of the SAE. The CCC will report all potentially related SAEs to the DSMB and to NHLBI within 7 days of discovery. A summary report of the events will be provided to the DSMB prior to each DSMB meeting, at least every six months. Safety oversight will be under the direction of a DSMB whose members will be independent from the study operations. The safety endpoints will be examined for all eligible patients who sign informed consent and are enrolled in the study on an intent-to-treat basis. Safety endpoints will include expected clinical events, including death, for this patient population and summarized by treatment group. All serious and unexpected adverse events will be summarized by treatment group as well.

### **Considerations for Continuation to a Phase III Clinical Trial**

The decision to proceed with a phase III trial is formally outlined as follows:

1) Initiate Phase III Study: Demonstrated efficacy signal in addition to adequate safety profile.

Criteria: Early termination for benefit at interim analysis or  $p < 0.08885$  at final analysis

( $\alpha=0.10$  for study). Serious adverse event profile of ASA not statistically worse than placebo

(95% confidence interval for the relative risk of any SAE covers the null value of  $RR=1.0$ ).

2) Further Development Potentially Required: Weak efficacy signal. Criteria: Primary endpoint

did not achieve *a priori* level of significance but there were at least a general consistency of



1  
2  
3 secondary endpoints indicating propensity for efficacy with a larger sample size and/or more  
4  
5 specific primary endpoint.  
6

7  
8 3) Abandon Treatment Platform: Harm (in efficacy or safety endpoints). Criteria: Study  
9  
10 terminated early per recommendation by DSMB for safety and/or risk/benefit ratio concerns (i.e.,  
11  
12 stop for futility, harm, unacceptable risk profile, etc.).  
13

### 14 15 **Ancillary Studies**

16  
17 The LIPS-A group will encourage investigator-initiated ancillary study proposals that  
18  
19 extend or complement the specific aims of the primary LIPS-A trial. As policy, all proposals  
20  
21 will be reviewed by a separate Ancillary Studies and Publications Committee, both to ensure  
22  
23 consistency with the goals and conduct of the main study and evaluate scientific merit and  
24  
25 validity. Proposed studies may utilize data and/or samples already accrued during the LIPS-A  
26  
27 trial or, when feasible, request additional data collection from participating sites. The  
28  
29 investigative and statistical plan will be reviewed *a priori*, with committee approval required  
30  
31 before analysis begins. Where equivocal, review decisions will be referred to the LIPS-A  
32  
33 Executive Committee. All reports, manuscripts or presentations derived from data obtained  
34  
35 through the ancillary study process will require review and approval by the Ancillary Studies and  
36  
37 Publications Committee prior to submission.  
38  
39  
40  
41  
42

### 43 44 **DISCUSSION**

45  
46 We have presented the study protocol and data analysis plans for the first phase II,  
47  
48 multicenter randomized clinical trial that will test the efficacy and safety of a promising ALI  
49  
50 prevention agent. Specifically, we have hypothesized that early administration of ASA to  
51  
52 hospitalized patients who are at high risk for ALI, will be safe and will reduce the likelihood of  
53  
54 progression to the full ALI phenotype. Secondly, this investigation will glean important  
55  
56  
57  
58  
59  
60

1  
2  
3 mechanistic data on ASA's impact on the pathways believed important in ALI pathogenesis as  
4 well as the potential value of relevant biomarkers in the prediction of subsequent development of  
5 ALI. Finally, the results of this study will provide essential information on both the scientific  
6 merit and feasibility of a larger, phase III trial testing the role of ASA in the prevention of lung  
7 injury.  
8  
9

10  
11  
12  
13  
14  
15 The persistent difficulty in translating promising pre-clinical therapies into the clinical  
16 setting has fostered interest in the potential development of effective ALI prevention strategies.  
17  
18 Indeed, prevention of ALI has been identified as a key strategic priority for invested parties such  
19 as the NHLBI.[31] However, implementation of protocols aiming to test potential ALI  
20 prevention strategies have been historically hindered by an inability to accurately predict who is  
21 at risk for ALI. Moreover, the typically short interval between risk exposure and development of  
22 ALI as well as the small proportion of patients who progress to the full ALI phenotype following  
23 an ALI-related exposure has limited the feasibility of ALI prevention studies. In addition, the  
24 historic lack of standardization for numerous important co-interventions that confound the  
25 associations of interest (e.g., ventilator management, transfusion and resuscitation practices) has  
26 also limited our ability to test preventative strategies.  
27  
28  
29  
30  
31  
32  
33  
34  
35  
36  
37  
38  
39

40  
41 To this end, the recently validated LIPS score is a key element of the herein described  
42 study protocol.[8] Specifically, the LIPS score is expected to facilitate the identification of  
43 patients at greatest risk of progressing to ALI (a LIPS score  $\geq 4$  is expected to identify a  
44 subgroup of patients who have a risk of progressing to ALI that is greater than 18%). In  
45 addition, it is notable that this ALI risk assessment tool was validated using data collected within  
46 the first 6 hours after the initial evaluation in the ED. In an ALI prevention protocol such as  
47  
48  
49  
50  
51  
52  
53  
54  
55  
56  
57  
58  
59  
60

1  
2  
3 described herein, where the time to randomization is limited to 12 hours from presentation to the  
4  
5 ED, the ability to accurately determine risk for ALI in such a time-efficient manner is critical.  
6  
7

8         A second notable strength of the current protocol is expected to be the implementation of  
9  
10 the CLIP for standardizing important co-interventions that may otherwise confound our  
11  
12 association of interest (ASA and ALI). During the period between hospital admission and the  
13  
14 development of ALI, health care delivery factors (timely treatment of infection and shock,  
15  
16 appropriate administration of fluid and transfusion therapies, prevention of aspiration, avoidance  
17  
18 of large tidal volume ventilation), may be as important as individual biology in determining ALI  
19  
20 development and outcome.[32-39] Moreover, a recent survey noted wide variation in clinical  
21  
22 practices such as the existence of a sepsis protocol, use of low tidal volume ventilation, positive  
23  
24 end-expiratory pressure, and restrictive transfusion practices, between hospitals and among the  
25  
26 ED, ICU and operating room within hospitals.[40] Thus, to effectively investigate preventive  
27  
28 strategies in ALI, the standardization of care delivery during the early phase of hospitalization  
29  
30 would appear critical. Indeed, the ARDSNet investigators have repeatedly shown the value of  
31  
32 standardization of clinical processes for ALI patients in clinical trials, allowing for determination  
33  
34 of incremental benefit of new interventions.[41, 42] In the current investigation, standardization  
35  
36 of care with best practices will help to reduce variability in the rates of ALI and the intensity of  
37  
38 lung injury (noise) due to inconsistencies in care delivery. The result is expected to be an  
39  
40 increased chance of seeing a beneficial clinical or biological effect from ASA and a better  
41  
42 assessment of the potential side effects of ASA in this population.  
43  
44  
45  
46  
47  
48  
49

50         Though the multicenter randomized clinical trial design, availability of a time-efficient  
51  
52 risk assessment tool (LIPS score) and the standardization of important co-interventions with  
53  
54 CLIP, as well as the robust study support and quality control offered through Metadata RAVE,  
55  
56  
57  
58  
59  
60

1  
2  
3 are clear strengths of the current study protocol, several important limitations with the planned  
4 investigation deserve note. Lung injury may be present at study entry even as clinical criteria for  
5 ALI are not fulfilled. Though a formal diagnosis of prevalent ALI is exclusionary, the molecular  
6 machinery will have been clearly set in motion in many of the study participants. Therefore, the  
7 study may be more accurately characterized as a prevention/early treatment trial rather than a  
8 pure prevention trial. Nonetheless, we have attempted to focus on the early period of ALI  
9 development by mandating a short interval from hospital presentation to randomization (12  
10 hours) and a similarly short interval from hospital presentation to administration of the first study  
11 dose (24 hours). In addition, the study will exclude patients who presented to an outside hospital  
12 ED more than 12 hours before arrival at the enrolling site's facility. The study will also exclude  
13 those with ALI on hospital presentation or prior to randomization as well as those who are  
14 receiving mechanical ventilation through a tracheostomy tube prior to the current hospital  
15 admission (patient who is ventilator dependent) or those with a history of interstitial lung disease  
16 with chronic pulmonary infiltrates that may mimic ALI.

17  
18  
19  
20  
21  
22  
23  
24  
25  
26  
27  
28  
29  
30  
31  
32  
33  
34  
35  
36  
37 A second limitation relates to the intervention of ASA administration. Specifically, it is  
38 now well documented that more than 10% of the population will have a variable response to  
39 ASA or at least some form of aspirin resistance.[17] These patients may not benefit from ASA,  
40 even if ASA can modulate the development of lung injury. However, as part of this study, we  
41 will measure plasma thromboxane, a sensitive indicator of ASA resistance, to determine the  
42 prevalence of ASA resistance in patients at high risk for ALI. As such, sensitivity analyses,  
43 stratifying study participants by ASA resistance (as determined by changes in thromboxane  
44 levels), may allow us to determine whether the effect of ASA on ALI development is isolated to  
45 those susceptible to the actions of ASA. A related concern is the potential influence of  
46  
47  
48  
49  
50  
51  
52  
53  
54  
55  
56  
57  
58  
59  
60

1  
2  
3 concomitant medications that may impact aspirin's ability to prevent or mitigate ALI (e.g.,  
4  
5  
6 statins, corticosteroids). To address this concern, we will be collecting detailed information on  
7  
8  
9 concomitant medications and, when necessary, appropriate statistical adjustments will be made.

10  
11 A third potential limitation with this study relates to a previously recognized major  
12  
13 barrier to ALI prevention studies, namely feasibility. First and foremost, a substantial proportion  
14  
15 of the target population may be expected to be receiving ASA on presentation to the ED, an  
16  
17 exclusion criteria for the current protocol. Notably, however, our preliminary work suggests that  
18  
19 upwards of two-thirds of the target population was not on ASA prior to admission. We also note  
20  
21 that over the three months of the initial LIPS,[8] there were 800 patients who fulfilled study  
22  
23 inclusion criteria of LIPS score  $\geq 4$  and did not fulfill the exclusion criteria of pre-existing ASA  
24  
25 use, prevalent ALI, and elective surgery. Therefore, we believe that with 14 proposed sites and  
26  
27 two years of planned enrollment, we will successfully meet our enrollment goals of 400 total  
28  
29 patients. Also relating to feasibility, it is possible that some sites will be challenged by the short  
30  
31 time interval allowed for patient enrollment as well as the short time to study drug  
32  
33 administration. Though a valid concern, we believe the use of the LIPS score and the robust  
34  
35 support offered through Metadata<sup>TM</sup> RAVE will greatly facilitate the enrollment and  
36  
37 randomization procedures such that sites will indeed be successful in meeting these time-  
38  
39 sensitive challenges.  
40  
41  
42  
43  
44

45  
46 A fourth and final limitation which deserves mention relates to the potential toxicity of  
47  
48 the intervention of interest. Generally, ASA is well tolerated even in acutely ill, hospitalized  
49  
50 patients in whom ASA is often continued during the hospitalization. As an example, in a study  
51  
52 of ASA use up to the time of cardiac surgery, its continuation was not associated with an  
53  
54 increase need for transfusion therapies.[43] Nevertheless, there may be injury associated with  
55  
56  
57  
58  
59  
60

1  
2  
3 the administration of aspirin. To address this concern, patients at risk for major complications  
4 from ASA therapy have been excluded from the study. Multiple stopping criteria for patients  
5 who experience adverse events have also been incorporated into the protocol. In addition, the  
6 more complete understanding of the safety profile of an intervention of interest is an important  
7 goal of all phase II trials. In this regard, the information gleaned from this study, adverse events  
8 included, is necessary to help decide on the merits of proceeding to a phase III clinical trial.  
9  
10  
11  
12  
13  
14  
15  
16  
17  
18  
19

## 20 CONCLUSION

21  
22 This manuscript describes the study protocol and analysis plans for the first phase II  
23 randomized clinical trial of the promising ALI prevention agent ASA. In addition to providing  
24 important information on the safety and efficacy of ASA in patients at high risk for ALI, the  
25 results of this trial will also inform the scientific community regarding the merit and feasibility  
26 of a more definitive phase III clinical trial. Importantly, the significance of this effort lies not  
27 only in the specific results which will be obtained from the study protocol, but equally in the  
28 infrastructure that will be created to facilitate the conduct of this trial. Specifically, the  
29 development and utilization of innovative methods to facilitate the early identification of high-  
30 risk patients with the LIPS and the standardization of potential confounding co-interventions  
31 with CLIP will address key barriers to studying ALI prevention measures and is expected to lay a  
32 framework for the meaningful conduct of future ALI prevention studies as well.  
33  
34  
35  
36  
37  
38  
39  
40  
41  
42  
43  
44  
45  
46  
47  
48  
49  
50  
51  
52  
53  
54  
55  
56  
57  
58  
59  
60

**Table 1.** Study Exclusion Criteria

| Exclusion Criteria                                                                                                                                                                                  | Justification                                                  |
|-----------------------------------------------------------------------------------------------------------------------------------------------------------------------------------------------------|----------------------------------------------------------------|
| Anti-platelet therapy on admission or within 7 days prior to admission                                                                                                                              | Inability to ethically randomize                               |
| Presented to outside hospital emergency department > 12 hours before arrival at site's facility                                                                                                     | Inability to enroll within time frame for possible benefit     |
| Inability to obtain consent and randomize within 12 hours of hospital presentation                                                                                                                  | Inability to enroll within time frame for possible benefit     |
| Admitted for elective or emergency surgery                                                                                                                                                          | Aspirin not found to benefit this group in preliminary studies |
| ALI on hospital presentation or prior to randomization                                                                                                                                              | Inability to adequately assess outcome                         |
| Presentation believed to be due to pure heart failure and no other known risk factors for ALI                                                                                                       | Inability to adequately assess outcome                         |
| Receiving mechanical ventilation through a tracheostomy tube prior to current hospital admission (patient who is ventilator dependent)                                                              | Inability to adequately assess outcome                         |
| Bilateral pulmonary infiltrates present on admission only if the patient has a history of interstitial lung disease that can reasonably explain the current degree of pulmonary infiltrates present | Inability to adequately assess outcome                         |
| Allergy to aspirin or NSAIDs                                                                                                                                                                        | Intervention contraindicated                                   |
| Bleeding disorder*                                                                                                                                                                                  | Intervention contraindicated                                   |
| Suspected active bleeding or judged to be at high risk for bleeding complications                                                                                                                   | Intervention contraindicated                                   |
| Presence of acute kidney injury <sup>#</sup>                                                                                                                                                        | Intervention contraindicated                                   |
| Severe chronic liver disease (Child-Pugh class C)                                                                                                                                                   | Intervention contraindicated                                   |

|                                                                                                                                                                                                                |                                                            |
|----------------------------------------------------------------------------------------------------------------------------------------------------------------------------------------------------------------|------------------------------------------------------------|
| Active peptic ulcer disease (within past 6 months)                                                                                                                                                             | Intervention contraindicated                               |
| Pregnancy or breast feeding                                                                                                                                                                                    | Intervention contraindicated                               |
| Inability to administer study drug                                                                                                                                                                             | Unable to administer study drug                            |
| Expected hospital stay < 48 hours                                                                                                                                                                              | Incomplete study procedures and outcome data               |
| Admitted for comfort or hospice care                                                                                                                                                                           | Incomplete study procedures and outcome data               |
| Patient, surrogate or physician not committed to full support (exception: a patient will not be excluded if he/she would receive all supportive care except for attempts at resuscitation from cardiac arrest) | Unable to assess primary outcome                           |
| Not anticipated to survive > 48 hours                                                                                                                                                                          | Incomplete study procedures and outcome data               |
| Previously enrolled in this trial                                                                                                                                                                              | Violates the statistical assumption of sample independence |
| Enrollment in concomitant intervention study                                                                                                                                                                   | Potential confounding and co-enrollment interactions       |

\*Any disorder with known associated with increased risk of bleeding. Common disorders may include thrombocytopenia, disseminated intravascular coagulation, hemophilia, von Willebrand disease, oral anticoagulant therapy, or advanced liver disease with associated coagulation disorders. Platelet count < 50,000 or absence of platelet count in the previous 24 hours to allow for assessment of platelet status.

# Acute kidney injury defined as “R” or greater according to RIFLE criteria. ALI = acute lung injury, NSAIDs = non-steroidal anti-inflammatory medications



**Table 2.** Elements of CLIP – Checklist for Lung Injury Prevention

| CLIP Elements                                               | Definition                                                                                                                                                                                                      |
|-------------------------------------------------------------|-----------------------------------------------------------------------------------------------------------------------------------------------------------------------------------------------------------------|
| Lung protective mechanical ventilation                      | Tidal volume between 6-8 mL/kg predicted body weight and plateau pressure < 30 cm H <sub>2</sub> O; PEEP ≥ 5 cm H <sub>2</sub> O, minimize FiO <sub>2</sub> (target oxygen saturation 88-92% after early shock) |
| Aspiration precautions                                      | Rapid sequence intubation supervised by experienced providers, elevated head of the bed, oral care with chlorhexidine, gastric acid neutralization in those not receiving tube feeds.                           |
| Adequate empiric antimicrobial treatment and source control | According to suspected site of infection, health care exposure, and immune suppression                                                                                                                          |
| Limiting fluid overload                                     | Modified ARDSNet FACTT protocol after early shock (first 12 hours)                                                                                                                                              |
| Restrictive transfusion                                     | Hemoglobin target > 7 g/dL in the absence of acute bleeding and/or ischemia                                                                                                                                     |
| Appropriate handoff of patients at risk                     | Providers taking care of patients at risk who require ICU admission will complete a structured handoff to the ICU team to continue with CLIP protocol for the duration of ICU stay                              |

CLIP = checklist for lung injury prevention, PEEP = positive end-expiratory pressure, FiO<sub>2</sub> = fraction of inspired oxygen concentration, ARDSNet = Acute Respiratory Distress Syndrome Network, FACTT = fluid and catheter treatment trial, ICU = intensive care unit

1  
2  
3  
4  
5  
6  
7  
8  
9  
10  
11  
12  
13  
14  
15  
16  
17  
18  
19  
20  
21  
22  
23  
24  
25  
26  
27  
28  
29  
30  
31  
32  
33  
34  
35  
36  
37  
38  
39  
40  
41  
42  
43  
44  
45  
46  
47  
48  
49

**Table 3:** Schedule of Events

| Event                                             | Time of presentation until first dose (screen / baseline) | First dose until end of that calendar day (Day 1) | Day 2 | Day 3 | Day 4 | Day 5 | Day 6 | Day 7 | 7 days after last dose | Hospital discharge or study Day 28, whichever comes first | 6 Months | 12 Months |
|---------------------------------------------------|-----------------------------------------------------------|---------------------------------------------------|-------|-------|-------|-------|-------|-------|------------------------|-----------------------------------------------------------|----------|-----------|
| Informed consent                                  | X                                                         |                                                   |       |       |       |       |       |       |                        |                                                           |          |           |
| Inclusion/exclusion criteria                      | X                                                         |                                                   |       |       |       |       |       |       |                        |                                                           |          |           |
| Pregnancy test in women of childbearing potential | X                                                         |                                                   |       |       |       |       |       |       |                        |                                                           |          |           |
| Demographics                                      | X                                                         |                                                   |       |       |       |       |       |       |                        |                                                           |          |           |
| Medical history                                   | X                                                         |                                                   |       |       |       |       |       |       |                        |                                                           |          |           |
| LIPS score                                        | X                                                         |                                                   |       |       |       |       |       |       |                        |                                                           |          |           |
| Randomization                                     | X                                                         |                                                   |       |       |       |       |       |       |                        |                                                           |          |           |
| Study drug administration                         |                                                           | X                                                 | X     | X     | X     | X     | X     | X     |                        |                                                           |          |           |
| Clinical outcome assessment                       | X                                                         | X                                                 | X     | X     | X     | X     | X     | X     |                        |                                                           |          |           |
| Safety labs: Cr and Hb                            | x                                                         |                                                   | X     | X     | X     | X     | X     | X     |                        |                                                           |          |           |
| Clinical data as available: labs, ABG             | X                                                         | X                                                 | X     | X     | X     | X     | X     | X     |                        |                                                           |          |           |
| CXR / ABG*                                        |                                                           | X                                                 | X     | X     | X     | X     | X     | X     |                        |                                                           |          |           |
| CLIP                                              | X                                                         | X                                                 | X     | X     | X     | X     | X     | X     |                        |                                                           |          |           |
| AE/SAE monitoring                                 |                                                           | X                                                 | X     | X     | X     | X     | X     | X     | X                      | X                                                         |          |           |

|                           |   |  |   |  |   |  |  |  |  |   |   |   |
|---------------------------|---|--|---|--|---|--|--|--|--|---|---|---|
| Survival                  |   |  |   |  |   |  |  |  |  | X |   | X |
| Plasma biomarkers of ALI  | X |  | X |  | X |  |  |  |  |   |   |   |
| SF-12                     | X |  |   |  |   |  |  |  |  |   | X | X |
| Barthel Index             | X |  |   |  |   |  |  |  |  |   | X | X |
| Vulnerable Elders Survey  | X |  |   |  |   |  |  |  |  | X | X |   |
| Brussels / SOFA composite |   |  |   |  |   |  |  |  |  | X |   |   |

\*Chest x-ray required on days 1-7 ONLY IF patient is intubated, and DOES NOT have ALI / ARDS already, AND there is clinical evidence of worsening respiratory status defined as:

- Previous P/F ratio  $\geq 300$ , with current P/F ratio  $< 300$  and no chest x-ray within 24 hours.
- Prior P/F ratio  $< 300$  and the PF ratio has fallen more than 10% AND no chest x-ray within 24 hours.
- In cases where an ABG is not available, the research team should obtain an ABG **only if** the S/F ratio falls below 315 consistently. The P/F ratio obtained from that ABG will be used to determine whether a chest x-ray needs to be obtained (as per criteria outlined above).
- If change in P/F ratio triggers the need for a chest x-ray or ABG as above, sites have 24 hours to conduct the necessary procedure. An ABG or chest x-ray obtained by the clinical team during that time period is also acceptable and obviates the need to obtain said procedure for the research study.

LIPS = Lung injury prevention, ALI = acute lung injury, LIS = lung injury severity score, Cr = creatinine, Hb = hemoglobin, ABG = arterial blood gas, CLIP = checklist for lung injury prevention, AE = adverse events, SAE = serious adverse events, SF-12 = 12-Item Short-Form Health Survey, SOFA = sequential organ failure assessment.

**Table 4:** Plasma biomarkers in ALI/ARDS

| <b>Plasma Biomarker</b>                             | <b>Importance in ALI/ARDS Development</b>                | <b>Associated outcomes other than ALI/ARDS</b>             |
|-----------------------------------------------------|----------------------------------------------------------|------------------------------------------------------------|
| Surfactant protein-D[44-46]                         | Reflect injury and ↑ permeability of alveolar epithelium | VFD, organ failure                                         |
| Receptor for advanced glycation end products[47-49] | Reflects endothelial activation and injury               | VFD,[49] organ failure,[49] ARDS after lung transplant[47] |
| Intercellular adhesion molecule-1[44, 50-53]        | Reflects endothelial activation and injury               | VFD,[51] organ failure[51]                                 |
| Interleukin-6[44, 54-56]                            | Inflammation                                             | VFD,[55] organ failure[55]                                 |
| Interleukin-8[44, 48, 50, 54-56]                    | Inflammation                                             | VFD, [55]organ failure[55]                                 |
| Plasminogen activator inhibitor-1[44, 50, 57-61]    | Activation of coagulation and inhibition of fibrinolysis | VFD,[61] organ failure[61]                                 |
| von Willebrand factor[44, 48, 60, 62, 63]           | Reflects endothelial activation and injury               | organ failure                                              |
| Protein C[44, 50, 59, 61, 64]                       | Activation of coagulation and inhibition of fibrinolysis | ARDS after lung transplant,[47] VFD,[61] organ failure[61] |

ALI = acute lung injury, ARDS = acute respiratory distress syndrome, VFD = ventilator-free days.

1  
2  
3  
4  
5  
6  
7  
8  
9  
10  
11  
12  
13  
14  
15  
16  
17  
18  
19  
20  
21  
22  
23  
24  
25  
26  
27  
28  
29  
30  
31  
32  
33  
34  
35  
36  
37  
38  
39  
40  
41  
42  
43  
44  
45  
46  
47  
48  
49  
50  
51  
52  
53  
54  
55  
56  
57  
58  
59  
60  
**REFERENCES**

1. Rubenfeld GD, Caldwell E, Peabody E, et al. Incidence and outcomes of acute lung injury. *N Engl J Med* 2005;**353**:1685-93.
2. Li G, Malinchoc M, Cartin-Ceba R, et al. Eight-year trend of acute respiratory distress syndrome: a population-based study in Olmsted County, Minnesota. *Am J Respir Crit Care Med* 2011;**183**:59-66.
3. Erickson SE, Martin GS, Davis JL, et al. Recent trends in acute lung injury mortality: 1996-2005. *Crit Care Med* 2009;**37**:1574-9.
4. Herridge MS, Tansey CM, Matté A, et al. Functional disability 5 years after acute respiratory distress syndrome. *N Engl J Med* 2011;**364**:1293-304.
5. Hudson LD, Milberg JA, Anardi D, et al. Clinical risks for development of the acute respiratory distress syndrome. *Am J Respir Crit Care Med* 1995;**151**:293-301.
6. Fowler AA, Hamman RF, Good JT, et al. Adult respiratory distress syndrome: risk with common predispositions. *Ann Intern Med* 1983;**98**:593-7.
7. Gong MN, Thompson BT, Williams P, et al. Clinical predictors of and mortality in acute respiratory distress syndrome: potential role of red cell transfusion. *Crit Care Med* 2005;**33**:1191-8.
8. Gajic O, Dabbagh O, Park PK, et al. Early identification of patients at risk of acute lung injury: evaluation of lung injury prediction score in a multicenter cohort study. *Am J Respir Crit Care Med* 2010;**183**:462-70.
9. Zarbock A, Ley K. The role of platelets in acute lung injury (ALI). *Front Biosci* 2009;**14**:150-8.

10. Zarbock A, Polanowska-Grabowska RK, Ley K. Platelet-neutrophil-interactions: linking hemostasis and inflammation. *Blood Rev* 2007;**21**:99-111.
11. Looney MR, Nguyen JX, Hu Y, et al. Platelet depletion and aspirin treatment protect mice in a two-event model of transfusion-related acute lung injury. *J Clin Invest* 2009;**119**:3450-61.
12. El Kebir D, József L, Pan W, et al. 15-epi-lipoxin A4 inhibits myeloperoxidase signaling and enhances resolution of acute lung injury. *Am J Respir Crit Care Med* 2009;**180**:311-9.
13. Fukunaga K, Kohli P, Bonnans C, et al. Cyclooxygenase 2 plays a pivotal role in the resolution of acute lung injury. *J Immunol* 2005;**174**:5033-9.
14. Maderna P, Godson C. Lipoxins: revolutionary road. *Br J Pharmacol* 2009;**158**:947-59.
15. Chelucci GL, Boncinelli S, Marsili M, et al. Aspirin effect on early and late changes in acute lung injury in sheep. *Intensive Care Med* 1993;**19**:13-21.
16. Sigurdsson GH, Vallgren S, Christenson JT. Influence of aspirin and steroids on acute lung injury after i.v. injection of a sclerosing agent. *Acta Chir Scand* 1989;**155**:163-70.
17. Yasuda O, Takemura Y, Kawamoto H, et al. Aspirin: recent developments. *Cell Mol Life Sci* 2008;**65**:354-8.
18. Jin SW, Zhang L, Lian QQ, et al. Posttreatment with aspirin-triggered lipoxin A4 analog attenuates lipopolysaccharide-induced acute lung injury in mice: the role of heme oxygenase-1. *Anesth Analg* 2007;**104**:369-77.
19. Tabuchi A, Kuebler WM. Endothelium-platelet interactions in inflammatory lung disease. *Vasc Pharmacol* 2008;**49**:141-50.

- 1  
2  
3  
4  
5  
6  
7  
8  
9  
10  
11  
12  
13  
14  
15  
16  
17  
18  
19  
20  
21  
22  
23  
24  
25  
26  
27  
28  
29  
30  
31  
32  
33  
34  
35  
36  
37  
38  
39  
40  
41  
42  
43  
44  
45  
46  
47  
48  
49  
50  
51  
52  
53  
54  
55  
56  
57  
58  
59  
60
20. Grommes J, Alard J-E, Drechsler M, et al. Disruption of platelet-derived chemokine heteromers prevents neutrophil extravasation in acute lung injury. *Am J Resp Crit Care Med* 2012;**185**:628-36.
  21. Clark SR, Ma AC, Tavener SA, et al. Platelet TLR4 activates neutrophil extracellular traps to ensnare bacteria in septic blood. *Nature Med* 2007;**13**:463-9.
  22. Narasaraju T, Yang E, Samy RP, et al. Excessive neutrophils and neutrophil extracellular traps contribute to acute lung injury of influenza pneumonitis. *Am J Pathol* 2011;**179**:199-210.
  23. Erlich JM, Talmor DS, Cartin-Ceba R, et al. Prehospitalization antiplatelet therapy is associated with a reduced incidence of acute lung injury. A population-based cohort study. *Chest* 2011;**139**:289-95.
  24. Kor DJ, Erlich J, Gong MN, et al. Association of prehospitalization aspirin therapy and acute lung injury: results of a multicenter international observational study of at-risk patients. *Crit Care Med* 2011;**39**:2393-400.
  25. Patrono C, Garcia Rodriguez LA, Landolfi R, et al. Low-dose aspirin for the prevention of atherothrombosis. *N Engl J Med* 2005;**353**:2373-83.
  26. Chiang N, Bermudez EA, Ridker PM, et al. Aspirin triggers antiinflammatory 15-epi-lipoxin A4 and inhibits thromboxane in a randomized human trial. *Proc Natl Acad Sci USA* 2004;**101**:15178-83.
  27. Bernard GR, Artigas A, Brigham KL, et al. The American-European Consensus Conference on ARDS. Definitions, mechanisms, relevant outcomes, and clinical trial coordination. *Am J Respir Crit Care Med* 1994;**149**:818-24.

- 1  
2  
3 28. Rubenfeld GD. Interobserver variability in applying a radiographic definition for ARDS.  
4  
5 *Chest* 1999;**116**:1347-53.  
6  
7
- 8 29. Pocock SJ, Simon R. Sequential treatment assignment with balancing for prognostic  
9 factors in the controlled clinical trial. *Biometrics* 1975;**31**:103-15.  
10  
11
- 12 30. Diggle P, Liang K, Zeger S. Analysis of Longitudinal Data. New York: Oxford University  
13 Press, Inc.; 1994.  
14  
15
- 16 31. Spragg RG, Bernard GR, Checkley W, et al. Beyond mortality: future clinical research in  
17 acute lung injury. *Am J Respir Crit Care Med* 2010;**181**:1121-7.  
18  
19
- 20 32. Gajic O, Dara SI, Mendez JL, et al. Ventilator-associated lung injury in patients without  
21 acute lung injury at the onset of mechanical ventilation. *Crit Care Med* 2004;**32**:1817-24.  
22  
23
- 24 33. Rana R, Fernandez-Perez ER, Khan SA, et al. Transfusion-related acute lung injury and  
25 pulmonary edema in critically ill patients: a retrospective study. *Transfusion*  
26 2006;**46**:1478-83.  
27  
28
- 29 34. Gajic O, Rana R, Winters JL, et al. Transfusion-related acute lung injury in the critically  
30 ill: prospective nested case-control study. *Am J Respir Crit Care Med* 2007;**176**:886-91.  
31  
32
- 33 35. Gajic O, Rana R, Mendez JL, et al. Acute lung injury after blood transfusion in  
34 mechanically ventilated patients. *Transfusion* 2004;**44**:1468-74.  
35  
36
- 37 36. Gajic O, Frutos-Vivar F, Esteban A, et al. Ventilator settings as a risk factor for acute  
38 respiratory distress syndrome in mechanically ventilated patients. *Intensive Care Med*  
39 2005;**31**:922-6.  
40  
41
- 42 37. Gajic O, Dzik WH, Toy P. Fresh frozen plasma and platelet transfusion for nonbleeding  
43 patients in the intensive care unit: benefit or harm? *Crit Care Med* 2006;**34**:S170-3.  
44  
45  
46  
47  
48  
49  
50  
51  
52  
53  
54  
55  
56  
57  
58  
59  
60



- 1  
2  
3  
4  
5  
6  
7  
8  
9  
10  
11  
12  
13  
14  
15  
16  
17  
18  
19  
20  
21  
22  
23  
24  
25  
26  
27  
28  
29  
30  
31  
32  
33  
34  
35  
36  
37  
38  
39  
40  
41  
42  
43  
44  
45  
46  
47  
48  
49  
50  
51  
52  
53  
54  
55  
56  
57  
58  
59  
60
38. Fernandez-Perez ER, Keegan MT, Brown DR, et al. Intraoperative tidal volume as a risk factor for respiratory failure after pneumonectomy. *Anesthesiology* 2006;**105**:14-8.
39. Khan H, Belsher J, Yilmaz M, et al. Fresh-frozen plasma and platelet transfusions are associated with development of acute lung injury in critically ill medical patients. *Chest* 2007;**131**:1308-14.
40. Hou P, Cohen J, Elie-Turenne M, et al. A survey on behalf of USCIITG-LIPS investigators: toward standardization of a checklist for lung injury prevention (CLIP). *Crit Care Med* 2010;**38**:576.
41. Brower RG, Lanken PN, MacIntyre N, et al. Higher versus lower positive end-expiratory pressures in patients with the acute respiratory distress syndrome. *N Engl J Med* 2004;**351**:327-36.
42. Wiedemann HP, Wheeler AP, Bernard GR, et al. Comparison of two fluid-management strategies in acute lung injury. *N Engl J Med* 2006;**353**:2564-75.
43. Gerrah R, Elami A, Stamler A, et al. Preoperative aspirin administration improves oxygenation in patients undergoing coronary artery bypass grafting. *Chest* 2005;**127**:1622-6.
44. Ware LB, Koyama T, Billheimer DD, et al. Prognostic and pathogenetic value of combining clinical and biochemical indices in patients with acute lung injury. *Chest* 2010;**137**:288-96.
45. Eisner M, Parsons P, Matthay M, et al. Plasma surfactant protein levels and clinical outcomes in patients with acute lung injury. *Thorax* 2003;**58**:983-8.

- 1  
2  
3  
4  
5  
6  
7  
8  
9  
10  
11  
12  
13  
14  
15  
16  
17  
18  
19  
20  
21  
22  
23  
24  
25  
26  
27  
28  
29  
30  
31  
32  
33  
34  
35  
36  
37  
38  
39  
40  
41  
42  
43  
44  
45  
46  
47  
48  
49  
50  
51  
52  
53  
54  
55  
56  
57  
58  
59  
60
46. Greene KE, Wright JR, Steinberg KP, et al. Serial changes in surfactant-associated proteins in lung and serum before and after onset of ARDS. *Am J Respir Crit Care Med* 1999;**160**:1843-50.
47. Christie JD, Shah CV, Kawut SM, et al. Plasma levels of receptor for advanced glycation end products, blood transfusion, and risk of primary graft dysfunction. *Am J Respir Crit Care Med* 2009;**180**:1010-5.
48. Fremont RD, Koyama T, Calfee CS, et al. Acute lung injury in patients with traumatic injuries: utility of a panel of biomarkers for diagnosis and pathogenesis. *J Trauma* 2010;**68**:1121-7.
49. Calfee CS, Ware LB, Eisner MD, et al. Plasma receptor for advanced glycation end products and clinical outcomes in acute lung injury. *Thorax* 2008;**63**:1083-9.
50. McClintock D, Zhuo H, Wickersham N, et al. Biomarkers of inflammation, coagulation and fibrinolysis predict mortality in acute lung injury. *Crit Care* 2008;**12**:R41.
51. Calfee CS, Eisner MD, Parsons PE, et al. Soluble intercellular adhesion molecule-1 and clinical outcomes in patients with acute lung injury. *Intensive Care Med* 2009;**35**:248-57.
52. Agouridakis P, Kyriakou D, Alexandrakis MG, et al. The predictive role of serum and bronchoalveolar lavage cytokines and adhesion molecules for acute respiratory distress syndrome development and outcome. *Respir Res* 2002;**3**:25.
53. Covarrubias M, Ware LB, Kawut SM, et al. Plasma intercellular adhesion molecule-1 and von Willebrand factor in primary graft dysfunction after lung transplantation. *Am J Transplant* 2007;**7**:2573-8.

- 1  
2  
3  
4  
5  
6  
7  
8  
9  
10  
11  
12  
13  
14  
15  
16  
17  
18  
19  
20  
21  
22  
23  
24  
25  
26  
27  
28  
29  
30  
31  
32  
33  
34  
35  
36  
37  
38  
39  
40  
41  
42  
43  
44  
45  
46  
47  
48  
49  
50  
51  
52  
53  
54  
55  
56  
57  
58  
59  
60
54. Bouros D, Alexandrakis MG, Antoniou KM, et al. The clinical significance of serum and bronchoalveolar lavage inflammatory cytokines in patients at risk for acute respiratory distress syndrome. *BMC Pulm Med* 2004;**4**:6.
  55. Parsons PE, Eisner MD, Thompson BT, et al. Lower tidal volume ventilation and plasma cytokine markers of inflammation in patients with acute lung injury. *Crit Care Med* 2005;**33**:1-6.
  56. Meduri GU, Headley S, Kohler G, et al. Persistent elevation of inflammatory cytokines predicts a poor outcome in ARDS. Plasma IL-1 beta and IL-6 levels are consistent and efficient predictors of outcome over time. *Chest* 1995;**107**:1062-73.
  57. Prabhakaran P, Ware LB, White KE, et al. Elevated levels of plasminogen activator inhibitor-1 in pulmonary edema fluid are associated with mortality in acute lung injury. *Am J Physiol Lung Cell Mol Physiol* 2003;**285**:L20-8.
  58. Ware LB, Fang X, Matthay MA. Protein C and thrombomodulin in human acute lung injury. *Am J Physiol Lung Cell Mol Physiol* 2003;**285**:L514-21.
  59. Christie JD, Robinson N, Ware LB, et al. Association of protein C and type 1 plasminogen activator inhibitor with primary graft dysfunction. *Am J Respir Crit Care Med* 2007;**175**:69-74.
  60. Ware LB, Conner ER, Matthay MA. von Willebrand factor antigen is an independent marker of poor outcome in patients with early acute lung injury. *Crit Care Med* 2001;**29**:2325-31.
  61. Ware LB, Matthay MA, Parsons PE, et al. Pathogenetic and prognostic significance of altered coagulation and fibrinolysis in acute lung injury/acute respiratory distress syndrome. *Crit Care Med* 2007;**35**:1821-8.

- 1  
2  
3 62. Rubin DB, Wiener-Kronish JP, Murray JF, et al. Elevated von Willebrand factor antigen is  
4 an early plasma predictor of acute lung injury in nonpulmonary sepsis syndrome. *J Clin*  
5  
6 *Invest* 1990;**86**:474-80.  
7  
8  
9  
10 63. Ware LB, Eisner MD, Thompson BT, et al. Significance of von Willebrand factor in  
11  
12 septic and nonseptic patients with acute lung injury. *Am J Respir Crit Care Med*  
13  
14 2004;**170**:766-72.  
15  
16  
17 64. Matthay MA, Ware LB. Plasma protein C levels in patients with acute lung injury:  
18  
19 prognostic significance. *Crit Care Med* 2004;**32**:S229-32.  
20  
21  
22  
23  
24  
25  
26  
27  
28  
29  
30  
31  
32  
33  
34  
35  
36  
37  
38  
39  
40  
41  
42  
43  
44  
45  
46  
47  
48  
49  
50  
51  
52  
53  
54  
55  
56  
57  
58  
59  
60

**Appendix A. Lung Injury Prevention Study with Aspirin (LIPS-A) Investigators**

|                                                                                   |                                                                                                                              |
|-----------------------------------------------------------------------------------|------------------------------------------------------------------------------------------------------------------------------|
| Beth Israel Deaconess Medical Center<br>(Clinical Coordinating Center)            | Massachusetts General Hospital                                                                                               |
| Daniel Talmor, MD, MPH<br>Michael Howell MD, MPH                                  | Ednan Bajwa, MD, MPH<br>Christopher Kabrhel, MD                                                                              |
| Bridgeport Hospital                                                               | Montefiore Medical Center<br>(Specimen Coordinating Center)                                                                  |
| David Kaufman, MD                                                                 | Michelle Gong, MD<br>Graciela Soto, MD                                                                                       |
| Brigham and Womens Hospital                                                       | University of Florida Medical Center                                                                                         |
| Peter Hou, MD<br>Bruce D. Levy, MD                                                | Marie-Carmelle Elie, MD<br>Hassan Alnuaimat, MD                                                                              |
| Duke University Medical Center                                                    | University of Illinois College of Medicine                                                                                   |
| PI: Ian Welsby, BSc, MBBS<br>Heatherlee Bailey, MD, FAAEM, FCCM                   | Ruxana Sadikot, MD, MRCP, FCCP                                                                                               |
| Harborview Medical Center                                                         | University of Louisville Medical Center                                                                                      |
| PI: Timothy R. Watkins, MD MSc                                                    | Ozan Akca, MD, FCCM<br>Rodrigo Cavallazzi, MD<br>Melissa Platt, MD                                                           |
| Mayo Clinic – Florida                                                             | University of Michigan                                                                                                       |
| Emir Festic, MD<br>Augustine Lee, MD                                              | Pauline Park, MD<br>Jill Cherry-Bukowiec, MD, MS<br>Lena Napolitano, MD<br>Krishnan Raghavendran, MD<br>John Younger, MD, MS |
| Mayo Clinic – Rochester<br>(Data Coordinating Center)                             | Wake Forest University Medical Center                                                                                        |
| Ognjen Gajic, MD<br>Daryl Kor, MD<br>Rahul Kashyap, MBBS<br>Leanne Clifford, MBBS | Jason Hoth, MD                                                                                                               |

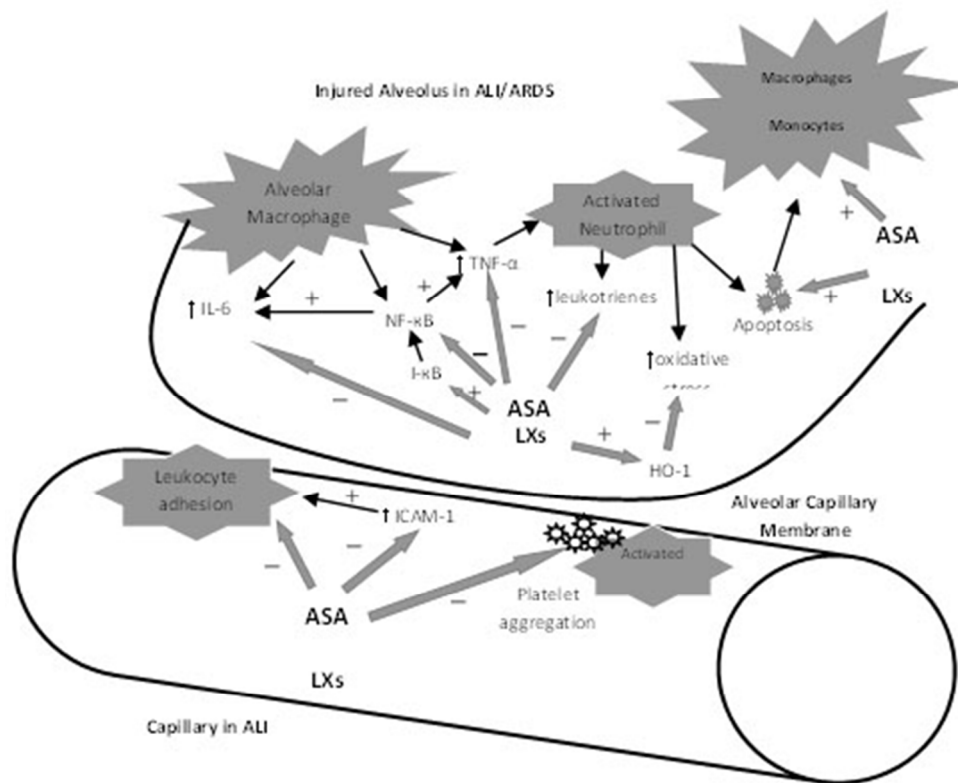

Illustration of the potential role of aspirin, lipoxins, and aspirin-triggered lipoxins on the mediators of ALI development and progression. Black arrows indicate events in ALI. Grey arrows indicate action of ASA, LXs, or ATLS.

ALI = acute lung injury, ARDS = acute respiratory distress syndrome, ASA = aspirin, LX = lipoxins, ATLS = aspirin-triggered lipoxins, IL-6 = interleukin-6, TNF = tumor necrosis factor, NF-κB = nuclear factor kappa-light-chain-enhancer of activated B-cells, I-κB = nuclear factor kappa-light-chain-enhancer of activated B-cells inhibitor, HO = heme oxygenase, ICAM = intercellular adhesion molecule

172x157mm (72 x 72 DPI)

1  
2  
3  
4  
5  
6  
7  
8  
9  
10  
11  
12  
13  
14  
15  
16  
17  
18  
19  
20  
21  
22  
23  
24  
25  
26  
27  
28  
29  
30  
31  
32  
33  
34  
35  
36  
37  
38  
39  
40  
41  
42  
43  
44  
45  
46  
47  
48  
49  
50  
51  
52  
53  
54  
55  
56  
57  
58  
59  
60

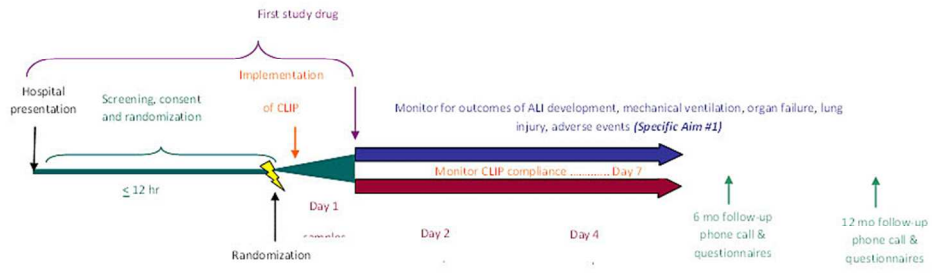

Schematic of the planned study procedures  
327x109mm (72 x 72 DPI)

peer review only



**Lung Injury Prevention with Aspirin (LIPS-A): Protocol for a Multicenter Randomized Clinical Trial in Medical Patients at High Risk for Acute Lung Injury.**

|                                 |                                                                                                                                                                                                                                                                                                                                                                                                                                                                                                                                                                      |
|---------------------------------|----------------------------------------------------------------------------------------------------------------------------------------------------------------------------------------------------------------------------------------------------------------------------------------------------------------------------------------------------------------------------------------------------------------------------------------------------------------------------------------------------------------------------------------------------------------------|
| Journal:                        | <i>BMJ Open</i>                                                                                                                                                                                                                                                                                                                                                                                                                                                                                                                                                      |
| Manuscript ID:                  | bmjopen-2012-001606.R1                                                                                                                                                                                                                                                                                                                                                                                                                                                                                                                                               |
| Article Type:                   | Protocol                                                                                                                                                                                                                                                                                                                                                                                                                                                                                                                                                             |
| Date Submitted by the Author:   | 10-Jul-2012                                                                                                                                                                                                                                                                                                                                                                                                                                                                                                                                                          |
| Complete List of Authors:       | Kor, Daryl; Mayo Clinic, Anesthesiology & Critical Care<br>Talmor, Daniel; Beth Israel Deaconess Medical Center, Anesthesiology & Critical Care<br>Banner-Goodspeed, Valerie; Beth Israel Deaconess Medical Center, Anesthesiology & Critical Care<br>Carter, Rickey; Mayo Clinic, Biomedical Statistics and Informatics<br>Hinds, Richard; Mayo Clinic, Anesthesiology<br>Park, Pauline; University of Michigan, Surgery<br>Gong, Michelle; Montefiore Medical Center, Pulmonary & Critical Care Medicine<br>Gajic, Ognjen; Mayo Clinic, Pulmonary & Critical Care, |
| <b>Primary Subject Heading</b>: | Respiratory medicine                                                                                                                                                                                                                                                                                                                                                                                                                                                                                                                                                 |
| Secondary Subject Heading:      | Research methods, Intensive care, Pharmacology and therapeutics                                                                                                                                                                                                                                                                                                                                                                                                                                                                                                      |
| Keywords:                       | acute lung injury, acute respiratory distress syndrome, aspirin, critical illness, prevention, clinical trial                                                                                                                                                                                                                                                                                                                                                                                                                                                        |
|                                 |                                                                                                                                                                                                                                                                                                                                                                                                                                                                                                                                                                      |

SCHOLARONE™  
Manuscripts



1  
2  
3  
4  
5  
6  
7  
8  
9  
10  
11  
12  
13  
14  
15  
16  
17  
18  
19  
20  
21  
22  
23  
24  
25  
26  
27  
28  
29  
30  
31  
32  
33  
34  
35  
36  
37  
38  
39  
40  
41  
42  
43  
44  
45  
46  
47  
48  
49  
50  
51  
52  
53  
54  
55  
56  
57  
58  
59  
60

For

For submission to: BMJ Open 6-4-2012  
A:\Groups\CCS\Robin.Kor\Manuscript\Aspirin Therapy in ALI\lung injury prevention with aspirin\_MBOOpen.docx

**LUNG INJURY PREVENTION WITH ASPIRIN (LIPS-A): A PROTOCOL METHODOLOGY FOR A MULTICENTER RANDOMIZED CLINICAL TRIAL IN MEDICAL PATIENTS AT HIGH RISK FOR ACUTE LUNG INJURY.**

- Daryl J. Kor, MD, Assistant Professor of Anesthesiology, Mayo Clinic College of Medicine, Rochester, MN
- Daniel S. Talmor MD, MPH, Associate Professor of Anesthesiology, Harvard Medical School, Boston, MA
- Valerie M. Banner-Goodspeed, ALB, Clinical Trial Specialist, Beth Israel Deaconess Medical Center, Boston, MA
- Rickey E. Carter, PhD, Associate Professor of Biostatistics, Mayo Clinic College of Medicine, Rochester, MN
- Richard Hinds, BS, MS, RRT, Department of Anesthesiology, Mayo Clinic, Rochester, MN
- Pauline K. Park, MD, Associate Professor of Surgery, University of Michigan School of Medicine, Ann Arbor, MI
- Ognjen Gajic, MD, MSc, FCCP, FCCM, Professor of Medicine, Mayo Clinic College of Medicine, Rochester, MN
- Michelle N. Gong MD, MS, Associate Professor of Medicine, Albert Einstein College of Medicine, Bronx, NY

On behalf of the US Critical Illness and Injury Trials Group: Lung Injury Prevention with Aspirin Study Group (USCHITG: LIPS-A).

This study is supported by Grant Numbers U01-HL108712-01, KL2 RR024151, and the Mayo Clinic Critical Care Research Committee. This protocol is registered with ClinicalTrials.gov, registration number NCT01504867.

**Keywords:** acute lung injury, acute respiratory distress syndrome, aspirin, critical illness, prevention, clinical trial.

**Word Count:**

Address correspondence requests to:  
Daryl J. Kor, M.D.  
Mayo Clinic, 200 First Street SW  
Rochester, MN 55905  
507-255-6051 / Fax 507-255-4267

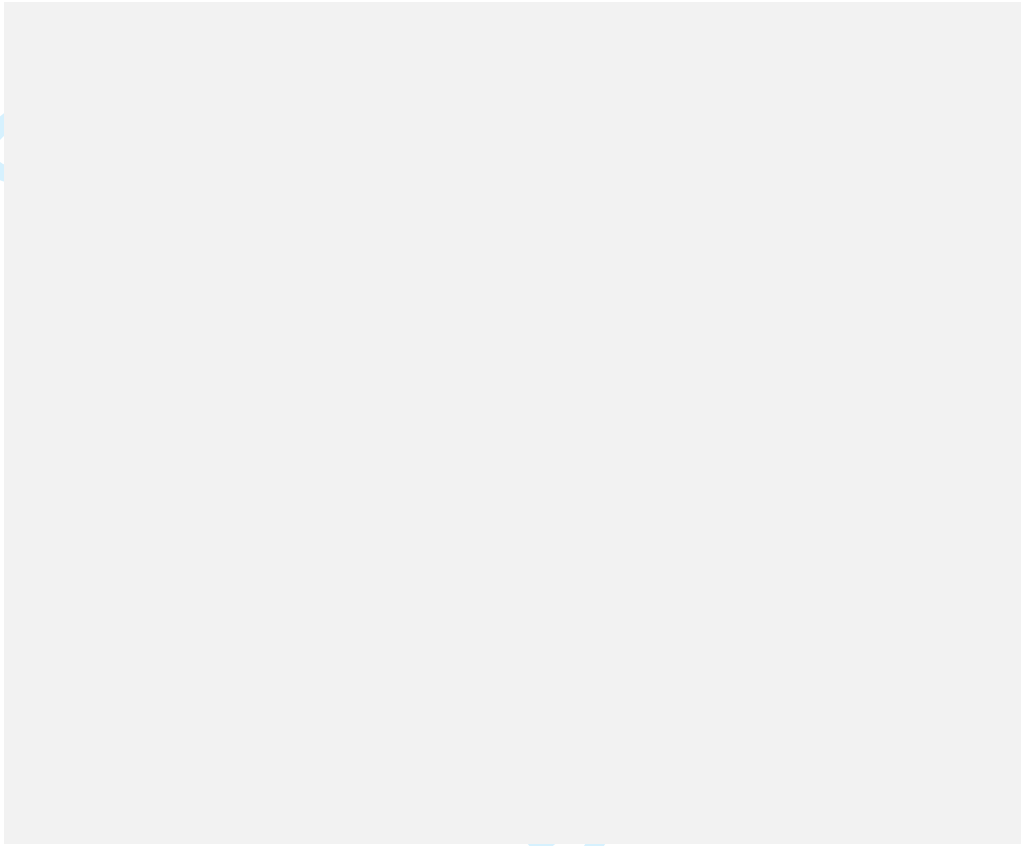

1  
2  
3  
4  
5  
6  
7  
8  
9  
10  
11  
12  
13  
14  
15  
16  
17  
18  
19  
20  
21  
22  
23  
24  
25  
26  
27  
28  
29  
30  
31  
32  
33  
34  
35  
36  
37  
38  
39  
40  
41  
42  
43  
44  
45  
46  
47  
48  
49  
50  
51  
52  
53  
54  
55  
56  
57  
58  
59  
60

[kor.daryl@mayo.edu](mailto:kor.daryl@mayo.edu)

For

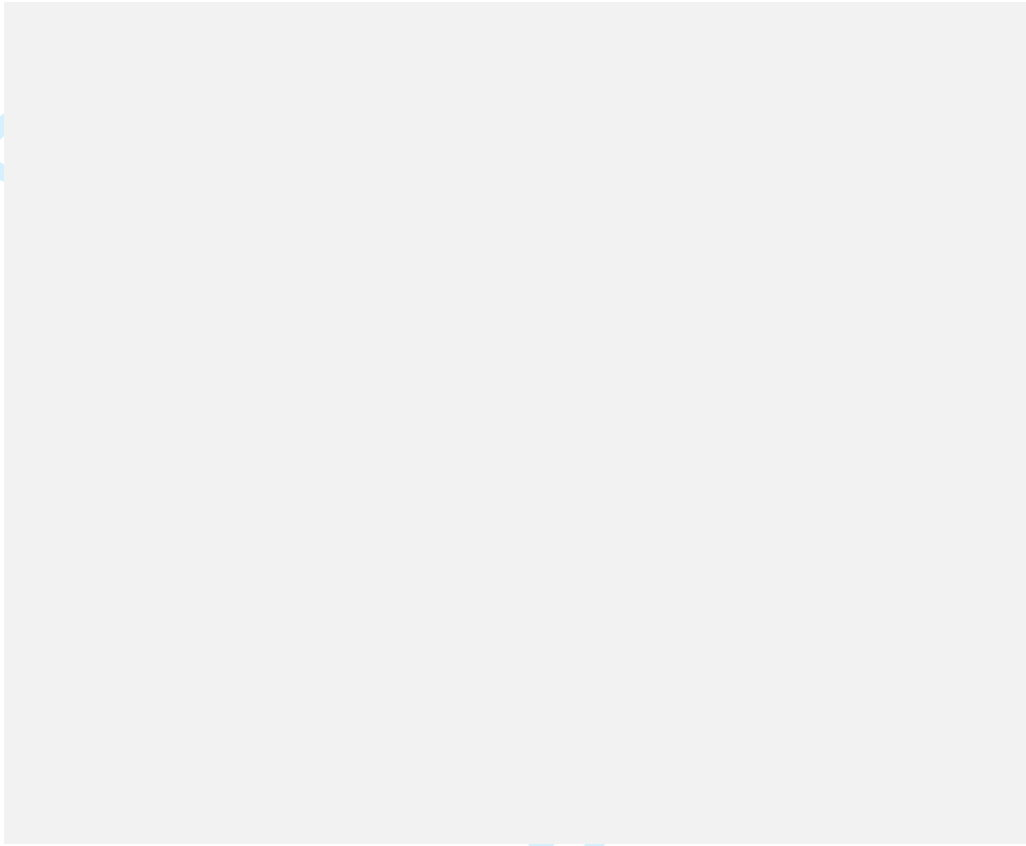

2

1  
2  
3  
4  
5  
6  
7  
8  
9  
10  
11  
12  
13  
14  
15  
16  
17  
18  
19  
20  
21  
22  
23  
24  
25  
26  
27  
28  
29  
30  
31  
32  
33  
34  
35  
36  
37  
38  
39  
40  
41  
42  
43  
44  
45  
46  
47  
48  
49  
50  
51  
52  
53  
54  
55  
56  
57  
58  
59  
60

**ABSTRACT**

**Introduction:** Acute Lung Injury (ALI) is a devastating condition that places a heavy burden on public health resources. Although the need for effective ALI prevention strategies is increasingly recognized, no effective preventative strategies exist. The Lung Injury Prevention Study with Aspirin (LIPS-A) aims to test whether aspirin (ASA) could prevent and/or mitigate the development of ALI.

**Methods and Analysis:** LIPS-A is a multicenter, double-blind, randomized clinical trial testing the hypothesis that the early administration of ASA will result in a reduced incidence of ALI in adult patients at high risk. This investigation will enroll 400 study participants from 14 hospitals across the US. Conditional logistic regression will be used to test the primary hypothesis that early ASA administration will decrease the incidence of ALI.

**Ethics and Dissemination:** Safety oversight will be under the direction of an independent data and safety monitoring board (DSMB). Approval of the protocol was obtained from the DSMB prior to enrolling the first study participant. Approval of both the protocol and informed consent documents were also obtained from the institutional review board of each participating institution prior to enrolling study participants at the respective site.

In addition to providing important clinical and mechanistic information, this investigation will inform the scientific merit and feasibility of a phase III trial on aspirin as an ALI prevention agent. The findings of this investigation, as well as associated ancillary studies, will be disseminated in the form of oral and abstract presentations at major national and international medical specialty meetings. The primary objective and other significant findings will also be presented in manuscript form. All final, published manuscripts resulting from this protocol will be submitted to Pub Med Central (PMC) in accordance with the National Institute of Health

1  
2  
3  
4  
5  
6  
7  
8  
9  
10  
11  
12  
13  
14  
15  
16  
17  
18  
19  
20 [Public Access Policy](#). This trial is registered with [ClinicalTrials.gov](#):

21 [NCT01504867](#). **Introduction:** The acute respiratory distress syndrome (ARDS) and the less  
22 severe acute lung injury (ALI) are devastating conditions that place a heavy burden on public  
23 health resources. Although the need for effective ALI prevention strategies has been  
24 increasingly recognized, no effective preventative strategies presently exist. The Lung Injury  
25 Prevention Study with Aspirin (LIPS-A) aims to test whether aspirin (ASA) administration could  
26 prevent and/or mitigate the development of ALI in patients determined to be at high risk for this  
27 life-threatening complication.

28 **Methods and Analysis:** LIPS-A is a multicenter, double-blind, phase II randomized  
29 clinical trial which aims to test the hypothesis that the early administration of ASA will be  
30 associated with a reduced incidence of ALI during the first seven days following hospital  
31 admission of adult patients at high risk for ALI. It is anticipated that this investigation will enroll  
32 400 total study participants from 14 hospitals across the United States. Conditional logistic  
33 regression will be used to test the primary hypothesis that early ASA administration will  
34 decrease the rate of ALI development. A planned interim analysis will be conducted at 50% of  
35 study participants enrolled.

36 **Ethics and Dissemination:** Safety oversight will be under the direction of a data and  
37 safety monitoring board whose members will be independent from the study operations. Safety  
38 endpoints will be examined for all eligible patients who sign informed consent and are enrolled  
39 in the study on an intent-to-treat basis—and

40 In addition to providing important clinical and mechanistic study results, the findings of this  
41 investigation will be informative on the scientific merit and feasibility of a phase III trial on the  
42 role of aspirin as an ALI prevention agent. The LIPS-A group will also encourage investigator  
43  
44  
45  
46  
47  
48  
49  
50  
51  
52  
53  
54  
55  
56  
57  
58  
59  
60

Formatted: Indent: First line: 0"

1  
2  
3  
4  
5  
6  
7  
8  
9  
10  
11  
12  
13  
14  
15  
16  
17  
18  
19  
20  
21  
22  
23  
24  
25  
26  
27  
28  
29  
30  
31  
32  
33  
34  
35  
36  
37  
38  
39  
40  
41  
42  
43  
44  
45  
46  
47  
48  
49  
50  
51  
52  
53  
54  
55  
56  
57  
58  
59  
60

initiated ancillary study proposals that extend or complement the specific aims of the primary  
LIPS-A trial. The primary objective and other significant findings

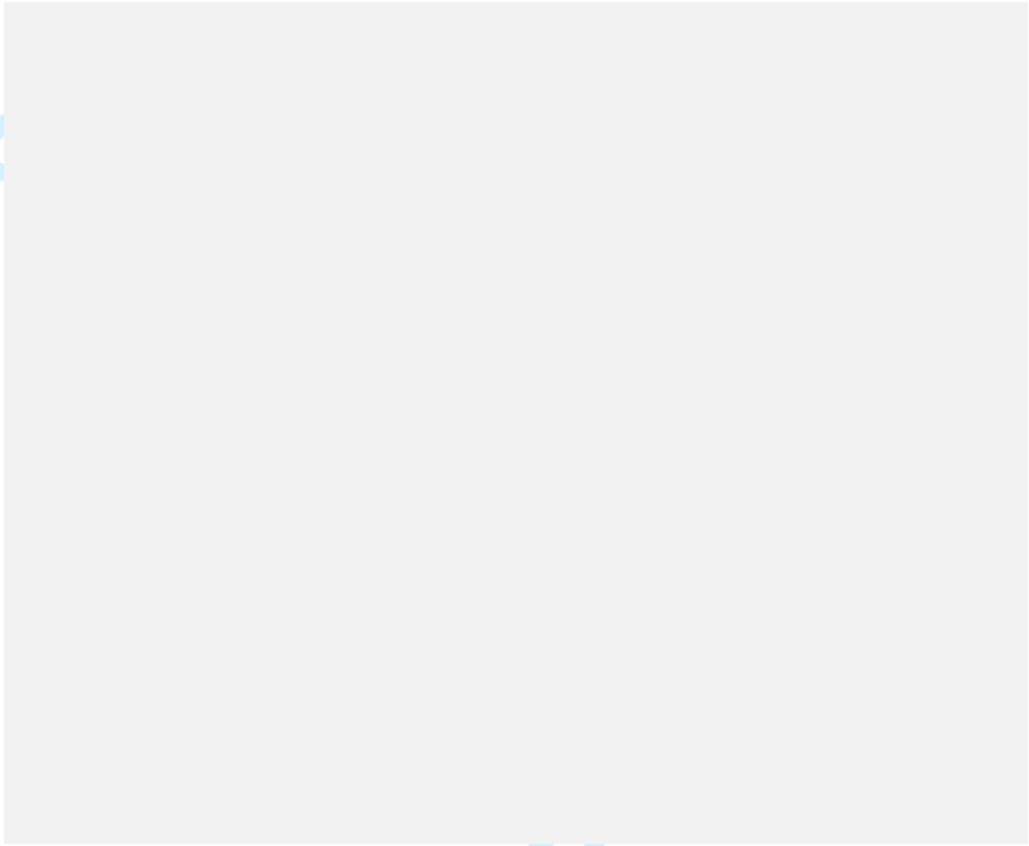

## INTRODUCTION

Acute lung injury (ALI) and the acute respiratory distress syndrome (ARDS) are life-threatening syndromes which continue to consume substantial health care resources and profoundly impact patient-important outcomes.[1] Although recent epidemiologic studies suggest the incidence of lung injury may be on the decline,[2] even conservative estimates suggest the associated mortality continues to exceed 25%.[3] Beyond mortality, an episode of ALI/ARDS also substantially influences patient's long-term outcomes with functional deficits persisting up to five years after the episode of respiratory failure.[4]

Importantly, the clinical syndrome of ALI generally occurs as a complication of an initial predisposing acute injury such as pneumonia, aspiration, sepsis, trauma, shock, or massive transfusion.[5] However, only a fraction of patients (10-30%) with these initial injuries develop ALI/ARDS.[6, 7] Only 30% of ALI patients fulfill criteria for ALI within six hours of presentation to the emergency department (ED).[8] The majority of patients develop ALI a median of two days after hospital presentation (IQR 1-4 days). This period of time between hospital presentation and development of ALI presents a window of opportunity for interventions to prevent the development of ALI.

Recently, accumulating evidence suggests an important role for platelets in both ALI pathogenesis [9-11] and resolution.[12-14] Notably, preclinical data suggests that aspirin (ASA) can modulate many of the platelet-mediated processes involved in ALI development [11, 15, 16] and resolution.[17, 18] Proposed mechanisms for these protective effects include reduced thromboxane  $A_2$ ,[9] P-selectin,[19] and platelet-derived chemokine (e.g. CCL5, CXCL4)[20] production, prevention of the formation of platelet-neutrophil aggregates[9] and neutrophil extracellular traps,[21, 22] and enhanced formation of anti-inflammatory lipid mediators such as

1  
2  
3  
4  
5  
6  
7  
8  
9  
10  
11  
12  
13  
14  
15  
16  
17  
18  
19  
20 15-epi-lipoxin A4 (Figure 1).[17] Importantly, recent observational studies have also suggested  
21 a potential preventive role for antiplatelet therapy in patients at high risk for ALI.[23, 24]  
22 However, the evidence remains inconclusive and equipoise remains.

23 To further enhance our understanding of ASA's role in the prevention and/or mitigation  
24 of ALI, the Lung Injury Prevention Study (LIPS) group with the support of the United States  
25 Critical Illness and Injury Trials Group (USCITG) as well as the National Heart, Lung and  
26 Blood Institute (NHLBI) have designed the Lung Injury Prevention Study with Aspirin (LIPS-  
27 A), a randomized clinical trial that aims to test the safety and efficacy of ASA in the prevention  
28 of ALI in patients determined to be at high risk. This paper describes the study procedures and  
29 planned analyses for this clinical trial.

#### 30 **METHODS AND ANALYSIS**

##### 31 **Administrative Structure**

32 To facilitate the conduct of the present investigation, as well as future ALI prevention  
33 studies, three specialized centers were established. The data and statistical coordinating center,  
34 responsible for data management, randomization, and pharmacy coordination, will reside at  
35 Mayo Clinic in Rochester, MN. The clinical coordinating center (CCC), responsible for the  
36 study conduct and safety monitoring, will reside at Beth Israel Deaconess Medical Center in  
37 Boston, MA. The biospecimen repository and Knowledge Translation Center, responsible for  
38 specimen management as well as the LIPS score and the checklist for lung injury prevention  
39 (CLIP) online screening tools, will reside at Montefiore Medical Center in Bronx, NY. The  
40 principal investigators from these three centers form the LIPS-A Executive Committee. This  
41 committee will collaboratively oversee all aspects of the study design and the protocol  
42 implementation.  
43  
44  
45  
46  
47  
48  
49  
50  
51  
52  
53  
54  
55  
56  
57  
58  
59  
60

**Study Design**

To test the hypothesis that ASA is associated with a reduced rate of incident ALI, the LIPS-A group has designed a multicenter, double-blind, placebo-controlled, parallel group, phase II randomized clinical trial. The ClinicalTrials.gov registration number is NCT01504867. An outline of the study design and study procedures appears in Figure 2.

**Study Population**

Adult patients aged 18 years and older at high risk for ALI on admission to the hospital will be enrolled. To facilitate the identification of those at high risk for ALI, the LIPS-A study will utilize the recently validated LIPS.[8] Patients will be considered at high risk for development of ALI based on a LIPS score of 4 or greater. Patients who fulfill criteria for ALI on hospital presentation or at any point prior to randomization will be excluded. A full list of exclusion criteria with the justification for each can be seen in Table 1.

Patients will be recruited from 14 clinical sites in the United States with experience in the identification and management of ALI. A full list of the participating institutions as well as each site's primary investigator can be seen in Appendix A and are indexed on ClinicalTrials.gov. The resulting study population is expected to be diverse and representative of the general population of patients at risk for ALI such that the study findings will be externally valid and generalizable to the broader academic community.

To facilitate patient enrollment, study coordinators at each participating institution will screen patients in the ED with a web-based LIPS calculator to determine each potential participant's risk for development of ALI. Eligible patients with a LIPS score  $\geq 4$  will be approached by study coordinators or study investigators for informed consent. Eligible patients will be enrolled and randomized within 12 hours of hospital presentation. This will allow for



1  
2  
3  
4  
5  
6  
7  
8  
9  
10  
11  
12  
13  
14  
15  
16  
17  
18  
19  
20 maximal recruitment within the window of opportunity for interventions to prevent ALI  
21 development as our preliminary data show median time to ALI is two days after hospital  
22 admission.[8]

### 23 Interventions

24 Study drug: The first dose of study drug (ASA versus placebo) will be administered  
25 within the first 24 hours after presentation to the hospital, either by mouth or by nasogastric or  
26 orogastric tube. For patients randomized to the intervention arm, a generic aspirin 325 mg one-  
27 time loading dose on day 1 will be administered followed by generic aspirin 81 mg by mouth  
28 once daily for study days 2-7 or until hospital discharge or death, whichever occurs first. The  
29 intervention duration of seven days was chosen because > 85% of ALI/ARDS cases were noted  
30 to have developed during this time frame in our preliminary studies.[8] In support of the dosing  
31 scheme chosen for this investigation, a randomized clinical trial noted low-dose ASA at 81 mg  
32 daily was effective in elevating plasma levels of anti-inflammatory lipoxins and inhibiting  
33 platelet thromboxane activity with only a slight increase in effect at higher doses of ASA.[25, 26]  
34 All study medication doses (active treatment with ASA and placebo) will be in powder form of  
35 identical color, contained within capsules that can be opened and administered via a gastric tube.

36 Co-interventions: Important co-interventions will be standardized in all study patients.  
37 To this end, the investigative team has developed a web-based, computerized, interactive tool to  
38 standardize essential elements of care delivery such as mechanical ventilation, aspiration  
39 precautions, infection control, fluid management and transfusion in patients at risk. This tool is a  
40 checklist for lung injury prevention (CLIP).[2] A summary of the CLIP elements is listed in  
41 Table 2. Having identified high-risk patients early in the course of the illness with the LIPS  
42 calculation and having standardized the important elements of care delivery with the CLIP, we  
43  
44  
45  
46  
47  
48  
49  
50  
51  
52  
53  
54  
55  
56  
57  
58  
59  
60

1  
2  
3  
4  
5  
6  
7  
8  
9  
10  
11  
12  
13  
14  
15  
16  
17  
18  
19  
20 expect to have optimized our ability to investigate whether ASA is a safe and effective agent in  
21 preventing ALI.

22 Related conditions and variables of interest: Additional conditions and variables of  
23 interest including pertinent baseline demographics and clinical characteristics such as age, sex,  
24 race, comorbidities, and all LIPS elements will also be recorded. Additional variables of note  
25 will include vital signs and laboratory values that are obtained during the course of routine care,  
26 APACHE IV scores, coadministration of statins, angiotensin converting enzyme-inhibitors and  
27 angiotensin-receptor blocking agents, insulin, amiodarone, or steroids; blood product  
28 administration, daily fluid status and vasopressor requirements. A full description of the  
29 schedule of events for this study protocol can be seen in Table 3.

#### 30 **Outcomes**

31 Clinical Outcomes: The primary outcome is the development of ALI within seven days  
32 of hospital admission. ALI will be defined as requirement for invasive mechanical ventilation  
33 and fulfillment of the American-European consensus definition for ALI/ARDS.[27] Patients will  
34 be screened daily for respiratory failure and the partial pressure of arterial oxygen (PaO<sub>2</sub>) to  
35 fraction of inspired oxygen (FiO<sub>2</sub>) ratio will be calculated daily for those on mechanical  
36 ventilation. Patients ventilated with non-invasive ventilation will not be considered ALI/ARDS  
37 as our preliminary data showed that the majority (90%) of ALI patients are eventually  
38 intubated.[8] Investigators at each site will review structured online training for assessment of  
39 ALI as used and described in the LIPS.[8] In addition, de-identified chest x-rays of the first  
40 five patients enrolled at each site will be sent to CCC for validation by the primary investigators.  
41 Any site with significant deviation will be re-trained. Each participating center's principal  
42 investigator will adjudicate the diagnosis of ALI/ARDS using standardized definitions. Patients  
43  
44  
45  
46  
47  
48  
49  
50  
51  
52  
53  
54  
55  
56  
57  
58  
59  
60

1  
2  
3  
4  
5  
6  
7  
8  
9  
10  
11  
12  
13  
14  
15  
16  
17  
18  
19  
20 receiving invasive mechanical ventilation who, within a given 24-hour period, fulfill criteria for  
21  $\text{PaO}_2/\text{FiO}_2 < 300$  mm Hg, bilateral infiltrates consistent with ALI and not completely explained  
22 by heart failure, will be determined to have developed ALI. Given prior data suggesting poor  
23 agreement in the radiological interpretation of bilateral infiltrates on chest radiographs consistent  
24 with ALI,[28] a secondary review of all ALI cases and a random sample of non-ALI cases will  
25 be performed by an independent expert investigator who is blinded to the initial ALI/ARDS  
26 adjudication. Study participants who die or are discharged from the hospital prior to day 7, and  
27 had not met criteria for ALI at the time of death or discharge, will be adjudicated as not having  
28 developed ALI.

29 Secondary clinical outcome assessments will include changes in the lung injury score and  
30 sequential organ failure assessment score, as well as the number of ventilator-free days at  
31 hospital day 28 and intensive care unit (ICU) and hospital lengths of stay. Mortality will be  
32 assessed at discharge from the ICU, from the hospital, and at 28 days. In addition, hospital  
33 survivors will undergo a brief follow-up phone survey to assess functional status (Barthel Index),  
34 health related quality of life [QOL (SF-12)] and frailty (VES-13) at 6- and 12-months after  
35 enrollment.

36 Mechanistic Outcomes: Secondary analyses will include evaluations of the mechanisms  
37 by which anti-platelet agents (e.g., ASA) may modulate the development and progression of lung  
38 injury as well as a determination of the value of plasma biomarkers of lung injury in the  
39 prediction of ALI development in patients at risk (beyond clinical variables). The study will  
40 examine biomarkers previously found to be associated with the *development* of ALI/ARDS in at-  
41 risk individuals (Table 4). In addition, to better understand the mechanisms by which ASA may  
42 affect the development and progression of ALI, the study will also examine the effect of ASA on  
43  
44  
45  
46  
47  
48  
49  
50  
51  
52  
53  
54  
55  
56  
57  
58  
59  
60

1  
2  
3  
4  
5  
6  
7  
8  
9  
10  
11  
12  
13  
14  
15  
16  
17  
18  
19  
20  
21  
22  
23  
24  
25  
26  
27  
28  
29  
30  
31  
32  
33  
34  
35  
36  
37  
38  
39  
40  
41  
42  
43  
44  
45  
46  
47  
48  
49  
50  
51  
52  
53  
54  
55  
56  
57  
58  
59  
60

ASA-triggered lipoxins, plasma thromboxane, and platelet-neutrophil aggregates. As it is likely that other important biomarkers in ALI may be identified in the future, plasma from consenting patients will be banked at the biorepository for future studies. Blood samples will be obtained at baseline (after randomization and before initiation of study intervention), on day two of study (approximately 24 hours after the first dose of study drug), and on day four of study (any time during day 4). For patients who provide consent relating to future genetic analyses, appropriate samples will be obtained.

#### Sample Size Estimation

The primary hypothesis for this investigation is that ASA (when compared to placebo) will result in a lower rate of incident ALI at day 7 following randomization. To adequately address this hypothesis, the sample size is estimated to be 200 participants per group (400 total). The assumptions involved in this calculation include the following: 1) the hypothesized placebo response rate will be 18%<sup>[8]</sup> 2) the minimum clinically relevant effect is 10 percentage points, and 3) the type I error rate ( $\alpha$ ) = 0.10 (two-sided) (final  $\alpha$ =0.0889 after interim analysis at 50% information fraction using O'Brien-Fleming-like alpha spending function). To be conservative during sample size estimation, the null proportion was shifted upwards to 25% (i.e., towards the region of maximum binomial variance) so that the initial sample size estimates are based on 25% vs. 15%. A chi-square test of proportions at the  $\alpha$  = 0.10 level of significance will have 80% power to detect the 10 percentage point difference with 197 participants per group. Overall recruitment is rounded to 200 participants per group (400 total) to allow for minor attrition, although attrition is not expected to affect the ascertainment of primary outcome. At the hypothesized level of 18% vs. 8% and with the alpha adjusted for multiple interim looks, power with 200 participants per group is 90%. Thus, for the primary analysis 400 total

1  
2  
3  
4  
5  
6  
7  
8  
9  
10  
11  
12  
13  
14  
15  
16  
17  
18  
19  
20 participants randomized 1:1 to placebo or ASA is anticipated to yield sufficient power to detect a  
21 clinically relevant difference in the incidence of ALL.

22 The Data and Statistical Coordinating Center will prepare weekly reports on the accrual  
23 process for the trial. The reports, which will be reviewed on the weekly executive committee  
24 calls, will include summarization of screening and randomization metrics. Detailed descriptions  
25 of exclusion criteria for disqualified study candidates will be provided and reviewed as well.  
26 Each clinical center has a target enrollment of 2 randomized participants per month. The reports  
27 will include a comparison of observed vs. expected accrual, by clinical center and overall for the  
28 trial. The randomization performance of each clinical center will be disseminated monthly to all  
29 study personnel through a study newsletter. If site-specific enrollment concerns are identified,  
30 methods for addressing these issues will be evaluated by the executive committee working with  
31 the site of interest. If a more pervasive and sustained gap between expected and observed  
32 participant accrual is identified, potential modifications to the inclusion and exclusion criteria of  
33 the protocol will be discussed. Any amendments to the inclusion and/or exclusion criteria  
34 deemed necessary by the executive committee will require approval by the DSMB as well as the  
35 IRB of each participating institution before implementation. If enrollment remains below plan,  
36 the inclusion of additional clinical sites will be considered as well.

#### Randomization and Blinding

37 LIPS-A will utilize centralized randomization software hosted by the Data and Statistical  
38 Coordinating Center. Randomization through the electronic data management system will be  
39 enabled upon electronic verification of inclusion and exclusion criteria and enrollment of the  
40 study participant by the clinical site investigators. Eligible-Enrolled participants will be  
41 randomized in a 1:1 ratio to the ASA or placebo treatment arm using dynamic minimization[29]

1  
2  
3  
4  
5  
6  
7  
8  
9  
10  
11  
12  
13  
14  
15  
16  
17  
18  
19  
20 with a second guess probability of 0.2. Randomization will be stratified by center. [To maintain](#)  
21 [the double blind for the study, only—and](#), the research pharmacist at each center will have  
22 electronic access to the unblinded treatment code for study medication preparation and  
23 dispensing. The rest of the site investigators and coordinating centers will be blinded to the  
24 actual treatment assignment. Emergency unblinding is available both electronically and through  
25 dispensing records at each pharmacy.

26 [In the event the electronic randomization system is not functioning, the research](#)  
27 [pharmacist at each center has a sealed emergency randomization kit to enable offline](#)  
28 [randomization. A manual of operation governs the use of the emergency randomization process.](#)  
29 [Briefly, prior to use of the emergency process, approval of both the coordinating centers is](#)  
30 [required. All attempts will be made to recover the system prior to the use of the offline](#)  
31 [procedure. Should the offline procedure be used, the electronic data management system will be](#)  
32 [updated to reflect the treatment assignment using the identification number contained within the](#)  
33 [randomization kit-identification number when it is available.](#)

#### 33 Statistical Methods

34 Conditional logistic regression will be used to test the primary hypothesis that early ASA  
35 administration will decrease the rate of ALI development. Clinical site will be treated as the  
36 stratification variable and conditioned out of the estimating equations. This approach is optimal  
37 in a clinical trial setting as it provides a test of null hypothesis that the ALI incidence is equal in  
38 the two treatment group and estimates the association in the event the null hypothesis is rejected  
39 (through the conditional odds ratio estimate). SAS PROC LOGISTIC™ (Cary, NC) will be used  
40 for estimation of the primary model.  
41  
42  
43  
44  
45  
46  
47  
48  
49  
50  
51  
52  
53  
54  
55  
56  
57  
58  
59  
60

1  
2  
3  
4  
5  
6  
7  
8  
9  
10  
11  
12  
13  
14  
15  
16  
17  
18  
19  
20  
21  
22  
23  
24  
25  
26  
27  
28  
29  
30  
31  
32  
33  
34  
35  
36  
37  
38  
39  
40  
41  
42  
43  
44  
45  
46  
47  
48  
49  
50  
51  
52  
53  
54  
55  
56  
57  
58  
59  
60

This analysis will be supplemented by the Cochran-Mantel-Haenszel stratified analysis with odds ratios computed for each site. The Breslow-Day test will be used to examine the data for potential effect modification (i.e., a "site effect"). In the event there is significant site-to-site variability in the estimated effect, stratified results will be reported for this phase II study. Evidence of heterogeneity of response at this phase of the study will yield invaluable preliminary data for the planning of future changes.

Planned interim analyses will be conducted at 50% of study participants enrolled. With the O'Brien-Fleming-like stopping boundaries, a final adjusted alpha of 0.08885 is anticipated; however, the final value may be changed depending on unplanned interim analyses (conducted at the request of the Data and Safety Monitoring Board [DSMB]) or slight deviations from the anticipated information milestones (0.50, 1.0). Stopping boundaries will be estimated using the LD Bounds package for the R system.

For the remaining continuous and dichotomous secondary endpoints, treatment group comparisons will be performed with respect to clinical outcomes as well as important prognostic factors at screening, baseline, and individual follow-up time points during the study duration. For continuous variables (e.g., age, weight, and laboratory assays), linear model techniques including *t*-tests, analysis of variance and analysis of covariance will be applied. Nonparametric procedures (e.g., the Wilcoxon rank sum test), will be used if data are not normally distributed and transformations of the data are not considered useful. Standard techniques for categorical data will be applied, including Fisher's exact test, Pearson  $\chi^2$  procedures, weighted least squares, and logistic regression analysis.

Longitudinal (or serially measured) endpoints will be evaluated by generalized linear models and linear mixed. Repeated measure analyses of binary endpoints will be analyzed using

1  
2  
3  
4  
5  
6  
7  
8  
9  
10  
11  
12  
13  
14  
15  
16  
17  
18  
19  
20 generalized estimating equations methods which do not require imputation of missing values,  
21 provided the data are ignorable missing.<sup>[30]</sup> Continuous dependent variables will utilize the  
22 mixed model approach with emphasis on evaluating the trajectories of values over time.

23 However, early improvement in these parameters may suggest a supportive, stabilizing role for  
24 ASA as a treatment option in patients at high risk of ALI. For the primary analysis, the clinical  
25 center will be treated as a “nuisance” parameter and conditioned out of the estimation routine.  
26 For secondary analyses, the clinical center will be used as a fixed covariate to account for  
27 differences across sites.

28 The safety endpoints (see below under “Adverse Outcomes”) will be examined for all  
29 participants in the safety evaluable analysis set. Safety endpoints will include expected clinical  
30 events, including death, for this patient population and summarized by treatment group. Also, all  
31 serious and unexpected adverse events will be summarized by treatment group. Fisher’s exact  
32 test will be used to estimate treatment differences in the incidence of each specified adverse  
33 event. No adjustments will be made for multiple hypothesis evaluations of safety endpoints.  
34 Adverse events will be summarized with groupings by body system. Other safety data (e.g., labs  
35 and assay data) will be listed, and when appropriate, summarized in tabular or graphical format.

#### 36 Data Quality and Management

37 This investigation will utilize the Medidata Rave™ system for data management and  
38 storage as well as to assist with the randomization procedures. This product has been designed  
39 to facilitate multicenter clinical trials conducted under 21 CFR Part 11 requirements. This  
40 secure, web-based system provides robust data validation routines, custom reporting and  
41 straightforward integration with statistical software packages such as SAS (utilized for this  
42 investigation). The system is coupled with an integrated randomization module that uses a  
43  
44  
45  
46  
47  
48  
49  
50  
51  
52  
53  
54  
55  
56  
57  
58  
59  
60



1  
2  
3  
4  
5  
6  
7  
8  
9  
10  
11  
12  
13  
14  
15  
16  
17  
18  
19  
20 multidimensional dynamic allocation algorithm to minimize imbalances across multiple  
21 dimensions including overall study, sites, factors and cross-factor strata. Specific details  
22 regarding the randomization process are given below.

## 23 ETHICS AND DISSEMINATION

### 24 Adverse Outcomes

25 Safety data including adverse events such as gastrointestinal ulcers, bleeding from any  
26 site, gastrointestinal discomfort, wheezing, rash, hives, angioedema, tinnitus, and mortality will  
27 be recorded. Adverse events will be defined as “unexpected,” “expected,” and “serious.” As our  
28 patient population is by definition “critically ill,” it is expected that they will have a number of  
29 unrelated adverse health events during the course of their hospital stay. Therefore, we will limit  
30 the scope of our adverse event monitoring and recording to the following:

31 1) Serious adverse events (SAEs) will be defined as:

- 32 • Death, *believed to be related to the study medication or procedures, or a death that is*  
33 *unexpected considering the acuity of a patient.*
- 34 • A life threatening experience *believed to be related to the study medication or*  
35 *procedures*
- 36 • Persistent or significant disability or incapacity *that is of greater frequency or severity*  
37 *than what would be normally expected in the course of critical illness.*
- 38 • An event that jeopardizes the human subject and may require medical or surgical  
39 treatment to prevent one of the preceding outcomes *and is not expected in the course of*  
40 *critical illness.*

41 2) Adverse events possibly related to aspirin administration will be defined as:

- 42 • Anaphylaxis / allergic reaction

1  
2  
3  
4  
5  
6  
7  
8  
9  
10  
11  
12  
13  
14  
15  
16  
17  
18  
19  
20  
21  
22  
23  
24  
25  
26  
27  
28  
29  
30  
31  
32  
33  
34  
35  
36  
37  
38  
39  
40  
41  
42  
43  
44  
45  
46  
47  
48  
49  
50  
51  
52  
53  
54  
55  
56  
57  
58  
59  
60

For Peer Review

- Gastrointestinal bleed / bleeding complications
- Transfusion requirements for suspected bleeding
- Acute kidney injury, defined as RIFLE stage "T" or greater
- Tinnitus
- Reye's syndrome

**Role of the Data Safety and Monitoring Board**

Reporting of SAEs will be conducted through the CCC. All centers will report SAEs within 24 hours of discovering the presence of the SAE. The CCC will report all potentially related SAEs to the DSMB and to NHLBI within 7 days of discovery. A summary report of the events will be provided to the DSMB prior to each DSMB meeting, at least every six months. Safety oversight will be under the direction of a DSMB whose members will be independent from the study operations. The safety endpoints will be examined for all eligible patients who sign informed consent and are enrolled in the study on an intent-to-treat basis. Safety endpoints will include expected clinical events, including death, for this patient population and summarized by treatment group. All serious and unexpected adverse events will be summarized by treatment group as well.

**Ethics Approval**

Approval of the protocol was obtained from the data safety and monitoring board as well as from NHLBI prior to enrolling the first study participant. In addition, approval of both the protocol and informed consent documents was required and obtained from the institutional review board of each participating institution prior to enrolling study participants at the respective study site. To ensure that each participating institution's informed consent documentation complied with NHLBI requirements and the Code of Federal Regulations Title 21

Formatted: Font: Bold

1  
2  
3  
4  
5  
6  
7  
8  
9  
10  
11  
12  
13  
14  
15  
16  
17  
18  
19  
20  
21  
22  
23  
24  
25  
26  
27  
28  
29  
30  
31  
32  
33  
34  
35  
36  
37  
38  
39  
40  
41  
42  
43  
44  
45  
46  
47  
48  
49  
50  
51  
52  
53  
54  
55  
56  
57  
58  
59  
60

[Part 50 Section 50.25, all informed consent forms were reviewed and approved by the CCC.](#)  
[Official documentation of all IRB approvals and all finalized informed consent forms have been collected and stored by the CCC.](#)

#### Considerations for Continuation to a Phase III Clinical Trial

The decision to proceed with a phase III trial is formally outlined as follows:

- 1) Initiate Phase III Study: Demonstrated efficacy signal in addition to adequate safety profile.  
Criteria: Early termination for benefit at interim analysis or  $p < 0.08885$  at final analysis ( $\alpha=0.10$  for study). Serious adverse event profile of ASA not statistically worse than placebo (95% confidence interval for the relative risk of any SAE covers the null value of  $RR=1.0$ ).
- 2) Further Development Potentially Required: Weak efficacy signal. Criteria: Primary endpoint did not achieve *a priori* level of significance but there were at least a general consistency of secondary endpoints indicating propensity for efficacy with a larger sample size and/or more specific primary endpoint.
- 3) Abandon Treatment Platform: Harm (in efficacy or safety endpoints). Criteria: Study terminated early per recommendation by DSMB for safety and/or risk/benefit ratio concerns (i.e., stop for futility, harm, unacceptable risk profile, etc.).

#### Ancillary Studies

The LIPS-A group will encourage investigator-initiated ancillary study proposals that extend or complement the specific aims of the primary LIPS-A trial. As policy, all proposals will be reviewed by a separate Ancillary Studies and Publications Committee, both to ensure consistency with the goals and conduct of the main study and evaluate scientific merit and validity. Proposed studies may utilize data and/or samples already accrued during the LIPS-A trial or, when feasible, request additional data collection from participating sites. The

1  
2  
3  
4  
5  
6  
7  
8  
9  
10  
11  
12  
13  
14  
15  
16  
17  
18  
19  
20  
21  
22  
23  
24  
25  
26  
27  
28  
29  
30  
31  
32  
33  
34  
35  
36  
37  
38  
39  
40  
41  
42  
43  
44  
45  
46  
47  
48  
49  
50  
51  
52  
53  
54  
55  
56  
57  
58  
59  
60

investigative and statistical plan will be reviewed *a priori*, with committee approval required before analysis begins. Where equivocal, review decisions will be referred to the LIPS-A Executive Committee. All reports, manuscripts or presentations derived from data obtained through the ancillary study process will require review and approval by the Ancillary Studies and Publications Committee prior to submission.

**Protocol funding and role of the funding sources**

This study is supported by the National Institutes of Health-National Heart Lung and Blood Institute (Grant Number U01-HL108712-01), the Mayo Clinic Center for Translational Science Activities (Grant Number KL2 RR024151) and the Mayo Clinic Critical Care Research Committee. Specifically, funding has been provided by each of these entities to support study personnel time and effort, protocol and data management development (Medidata Rave™), sample acquisition, processing and storage, and statistical support. These funding sources have had no specific influence on the scientific content of the study protocol. Similarly, the funding sources will have no direct role in the study conduct, nor data collection, analyses, or interpretation. The funding sources will also have no role in the writing or presentation of study results, nor decisions to submit for publication. The ultimate authority over each of these activities will be the executive committee of the LIPS-A study.

|                              |
|------------------------------|
| Formatted: Font: 12 pt, Bold |
| Formatted: Font: Bold        |
| Formatted: Font: 12 pt       |

**DISCUSSION**

We have presented the study protocol and data analysis plans for the first phase II, multicenter randomized clinical trial that will test the efficacy and safety of a promising ALI prevention agent. Specifically, we have hypothesized that early administration of ASA to hospitalized patients who are at high risk for ALI, will be safe and will reduce the likelihood of progression to the full ALI phenotype. Secondly, this investigation will glean important

1  
2  
3  
4  
5  
6  
7  
8  
9  
10  
11  
12  
13  
14  
15  
16  
17  
18  
19  
20  
21  
22  
23  
24  
25  
26  
27  
28  
29  
30  
31  
32  
33  
34  
35  
36  
37  
38  
39  
40  
41  
42  
43  
44  
45  
46  
47  
48  
49  
50  
51  
52  
53  
54  
55  
56  
57  
58  
59  
60

mechanistic data on ASA's impact on the pathways believed important in ALI pathogenesis as well as the potential value of relevant biomarkers in the prediction of subsequent development of ALI. Finally, the results of this study will provide essential information on both the scientific merit and feasibility of a larger, phase III trial testing the role of ASA in the prevention of lung injury.

The persistent difficulty in translating promising pre-clinical therapies into the clinical setting has fostered interest in the potential development of effective ALI prevention strategies. Indeed, prevention of ALI has been identified as a key strategic priority for invested parties such as the NHLBI.[31] However, implementation of protocols aiming to test potential ALI prevention strategies have been historically hindered by an inability to accurately predict who is at risk for ALI. Moreover, the typically short interval between risk exposure and development of ALI as well as the small proportion of patients who progress to the full ALI phenotype following an ALI-related exposure has limited the feasibility of ALI prevention studies. In addition, the historic lack of standardization for numerous important co-interventions that confound the associations of interest (e.g., ventilator management, transfusion and resuscitation practices) has also limited our ability to test preventative strategies.

To this end, the recently validated LIPS score is a key element of the herein described study protocol.[8] Specifically, the LIPS score is expected to facilitate the identification of patients at greatest risk of progressing to ALI (a LIPS score  $\geq 4$  is expected to identify a subgroup of patients who have a risk of progressing to ALI that is greater than 18%). In addition, it is notable that this ALI risk assessment tool was validated using data collected within the first 6 hours after the initial evaluation in the ED. In an ALI prevention protocol such as

1  
2  
3  
4  
5  
6  
7  
8  
9  
10  
11  
12  
13  
14  
15  
16  
17  
18  
19  
20 described herein, where the time to randomization is limited to 12 hours from presentation to the  
21 ED, the ability to accurately determine risk for ALI in such a time-efficient manner is critical.

22 A second notable strength of the current protocol is expected to be the implementation of  
23 the CLIP for standardizing important co-interventions that may otherwise confound our  
24 association of interest (ASA and ALI). During the period between hospital admission and the  
25 development of ALI, health care delivery factors (timely treatment of infection and shock,  
26 appropriate administration of fluid and transfusion therapies, prevention of aspiration, avoidance  
27 of large tidal volume ventilation), may be as important as individual biology in determining ALI  
28 development and outcome.[32-39] Moreover, a recent survey noted wide variation in clinical  
29 practices such as the existence of a sepsis protocol, use of low tidal volume ventilation, positive  
30 end-expiratory pressure, and restrictive transfusion practices, between hospitals and among the  
31 ED, ICU and operating room within hospitals.[40] Thus, to effectively investigate preventive  
32 strategies in ALI, the standardization of care delivery during the early phase of hospitalization  
33 would appear critical. Indeed, the ARDSNet investigators have repeatedly shown the value of  
34 standardization of clinical processes for ALI patients in clinical trials, allowing for determination  
35 of incremental benefit of new interventions [41, 42] In the current investigation, standardization  
36 of care with best practices will help to reduce variability in the rates of ALI and the intensity of  
37 lung injury (noise) due to inconsistencies in care delivery. The result is expected to be an  
38 increased chance of seeing a beneficial clinical or biological effect from ASA and a better  
39 assessment of the potential side effects of ASA in this population.

40 Though the multicenter randomized clinical trial design, availability of a time-efficient  
41 risk assessment tool (LIPS score) and the standardization of important co-interventions with  
42 CLIP, as well as the robust study support and quality control offered through Metadata RAVE,  
43  
44  
45  
46  
47  
48  
49  
50  
51  
52  
53  
54  
55  
56  
57  
58  
59  
60

1  
2  
3  
4  
5  
6  
7  
8  
9  
10  
11  
12  
13  
14  
15  
16  
17  
18  
19  
20  
21  
22  
23  
24  
25  
26  
27  
28  
29  
30  
31  
32  
33  
34  
35  
36  
37  
38  
39  
40  
41  
42  
43  
44  
45  
46  
47  
48  
49  
50  
51  
52  
53  
54  
55  
56  
57  
58  
59  
60

are clear strengths of the current study protocol, several important limitations with the planned investigation deserve note. Lung injury may be present at study entry even as clinical criteria for ALI are not fulfilled. Though a formal diagnosis of prevalent ALI is exclusionary, the molecular machinery will have been clearly set in motion in many of the study participants. Therefore, the study may be more accurately characterized as a prevention/early treatment trial rather than a pure prevention trial. Nonetheless, we have attempted to focus on the early period of ALI development by mandating a short interval from hospital presentation to randomization (12 hours) and a similarly short interval from hospital presentation to administration of the first study dose (24 hours). In addition, the study will exclude patients who presented to an outside hospital ED more than 12 hours before arrival at the enrolling site's facility. The study will also exclude those with ALI on hospital presentation or prior to randomization as well as those who are receiving mechanical ventilation through a tracheostomy tube prior to the current hospital admission (patient who is ventilator dependent) or those with a history of interstitial lung disease with chronic pulmonary infiltrates that may mimic ALI.

A second limitation relates to the intervention of ASA administration. Specifically, it is now well documented that more than 10% of the population will have a variable response to ASA or at least some form of aspirin resistance [17]. These patients may not benefit from ASA, even if ASA can modulate the development of lung injury. However, as part of this study, we will measure plasma thromboxane, a sensitive indicator of ASA resistance, to determine the prevalence of ASA resistance in patients at high risk for ALI. As such, sensitivity analyses, stratifying study participants by ASA resistance (as determined by changes in thromboxane levels), may allow us to determine whether the effect of ASA on ALI development is isolated to those susceptible to the actions of ASA. A related concern is the potential influence of

1  
2  
3  
4  
5  
6  
7  
8  
9  
10  
11  
12  
13  
14  
15  
16  
17  
18  
19  
20 concomitant medications that may impact aspirin's ability to prevent or mitigate ALI (e.g.,  
21 statins, corticosteroids). To address this concern, we will be collecting detailed information on  
22 concomitant medications and, when necessary, appropriate statistical adjustments will be made.

23 A third potential limitation with this study relates to a previously recognized major  
24 barrier to ALI prevention studies, namely feasibility. First and foremost, a substantial proportion  
25 of the target population may be expected to be receiving ASA on presentation to the ED, an  
26 exclusion criteria for the current protocol. Notably, however, our preliminary work suggests that  
27 upwards of two-thirds of the target population was not on ASA prior to admission. We also note  
28 that over the three months of the initial LIPS.[8] there were 800 patients who fulfilled study  
29 inclusion criteria of LIPS score  $\geq 4$  and did not fulfill the exclusion criteria of pre-existing ASA  
30 use, prevalent ALI, and elective surgery. Therefore, we believe that with 14 proposed sites and  
31 two years of planned enrollment, we will successfully meet our enrollment goals of 400 total  
32 patients. Also relating to feasibility, it is possible that some sites will be challenged by the short  
33 time interval allowed for patient enrollment as well as the short time to study drug  
34 administration. Though a valid concern, we believe the use of the LIPS score and the robust  
35 support offered through Metadata™ RAVE will greatly facilitate the enrollment and  
36 randomization procedures such that sites will indeed be successful in meeting these time-  
37 sensitive challenges.

38 A fourth and final limitation which deserves mention relates to the potential toxicity of  
39 the intervention of interest. Generally, ASA is well tolerated even in acutely ill, hospitalized  
40 patients in whom ASA is often continued during the hospitalization. As an example, in a study  
41 of ASA use up to the time of cardiac surgery, its continuation was not associated with an  
42 increase need for transfusion therapies.[43] Nevertheless, there may be injury associated with  
43  
44  
45  
46  
47  
48  
49  
50  
51  
52  
53  
54  
55  
56  
57  
58  
59  
60



1  
2  
3  
4  
5  
6  
7  
8  
9  
10  
11  
12  
13  
14  
15  
16  
17  
18  
19  
20  
21  
22  
23  
24  
25  
26  
27  
28  
29  
30  
31  
32  
33  
34  
35  
36  
37  
38  
39  
40  
41  
42  
43  
44  
45  
46  
47  
48  
49  
50  
51  
52  
53  
54  
55  
56  
57  
58  
59  
60

the administration of aspirin. To address this concern, patients at risk for major complications from ASA therapy have been excluded from the study. Multiple stopping criteria for patients who experience adverse events have also been incorporated into the protocol. In addition, the more complete understanding of the safety profile of an intervention of interest is an important goal of all phase II trials. In this regard, the information gleaned from this study, adverse events included, is necessary to help decide on the merits of proceeding to a phase III clinical trial.

#### CONCLUSION

This manuscript describes the study protocol and analysis plans for the first phase II randomized clinical trial of the promising ALI prevention agent ASA. In addition to providing important information on the safety and efficacy of ASA in patients at high risk for ALI, the results of this trial will also inform the scientific community regarding the merit and feasibility of a more definitive phase III clinical trial. Importantly, the significance of this effort lies not only in the specific results which will be obtained from the study protocol, but equally in the infrastructure that will be created to facilitate the conduct of this trial. Specifically, the development and utilization of innovative methods to facilitate the early identification of high-risk patients with the LIPS and the standardization of potential confounding co-interventions with CLIP will address key barriers to studying ALI prevention measures and is expected to lay a framework for the meaningful conduct of future ALI prevention studies as well.

Table 1. Study Exclusion Criteria

| Exclusion Criteria                                                                                                                                                                                  | Justification                                                  |
|-----------------------------------------------------------------------------------------------------------------------------------------------------------------------------------------------------|----------------------------------------------------------------|
| Anti-platelet therapy on admission or within 7 days prior to admission                                                                                                                              | Inability to ethically randomize                               |
| Presented to outside hospital emergency department > 12 hours before arrival at site's facility                                                                                                     | Inability to enroll within time frame for possible benefit     |
| Inability to obtain consent and randomize within 12 hours of hospital presentation                                                                                                                  | Inability to enroll within time frame for possible benefit     |
| Admitted for elective or emergency surgery                                                                                                                                                          | Aspirin not found to benefit this group in preliminary studies |
| ALI on hospital presentation or prior to randomization                                                                                                                                              | Inability to adequately assess outcome                         |
| Presentation believed to be due to pure heart failure and no other known risk factors for ALI                                                                                                       | Inability to adequately assess outcome                         |
| Receiving mechanical ventilation through a tracheostomy tube prior to current hospital admission (patient who is ventilator dependent)                                                              | Inability to adequately assess outcome                         |
| Bilateral pulmonary infiltrates present on admission only if the patient has a history of interstitial lung disease that can reasonably explain the current degree of pulmonary infiltrates present | Inability to adequately assess outcome                         |
| Allergy to aspirin or NSAIDs                                                                                                                                                                        | Intervention contraindicated                                   |
| Bleeding disorder                                                                                                                                                                                   | Intervention contraindicated                                   |
| Suspected active bleeding or judged to be at high risk for bleeding complications                                                                                                                   | Intervention contraindicated                                   |
| Presence of acute kidney injury <sup>a</sup>                                                                                                                                                        | Intervention contraindicated                                   |
| Severe chronic liver disease (Child-Pugh class C)                                                                                                                                                   | Intervention contraindicated                                   |

|                                                                                                                                                                                                                |                                                            |
|----------------------------------------------------------------------------------------------------------------------------------------------------------------------------------------------------------------|------------------------------------------------------------|
| Active peptic ulcer disease (within past 6 months)                                                                                                                                                             | Intervention contraindicated                               |
| Pregnancy or breast feeding                                                                                                                                                                                    | Intervention contraindicated                               |
| Inability to administer study drug                                                                                                                                                                             | Unable to administer study drug                            |
| Expected hospital stay < 48 hours                                                                                                                                                                              | Incomplete study procedures and outcome data               |
| Admitted for comfort or hospice care                                                                                                                                                                           | Incomplete study procedures and outcome data               |
| Patient, surrogate or physician not committed to full support (exception: a patient will not be excluded if he/she would receive all supportive care except for attempts at resuscitation from cardiac arrest) | Unable to assess primary outcome                           |
| Not anticipated to survive > 48 hours                                                                                                                                                                          | Incomplete study procedures and outcome data               |
| Previously enrolled in this trial                                                                                                                                                                              | Violates the statistical assumption of sample independence |
| Enrollment in concomitant intervention study                                                                                                                                                                   | Potential confounding and co-enrollment interactions       |

\*Any disorder with known associated with increased risk of bleeding. Common disorders may include thrombocytopenia, disseminated intravascular coagulation, hemophilia, von Willebrand disease, oral anticoagulant therapy, or advanced liver disease with associated coagulation disorders. Platelet count < 50,000 or absence of platelet count in the previous 24 hours to allow for assessment of platelet status.

†Acute kidney injury defined as "R" or greater according to RIFLE criteria. ALI = acute lung injury, NSAIDs = non-steroidal anti-inflammatory medications

**Table 2.** Elements of CLIP – Checklist for Lung Injury Prevention

| CLIP Elements                                               | Definition                                                                                                                                                                                                      |
|-------------------------------------------------------------|-----------------------------------------------------------------------------------------------------------------------------------------------------------------------------------------------------------------|
| Lung protective mechanical ventilation                      | Tidal volume between 6-8 mL/kg predicted body weight and plateau pressure < 30 cm H <sub>2</sub> O; PEEP ≥ 5 cm H <sub>2</sub> O, minimize FiO <sub>2</sub> (target oxygen saturation 88-92% after early shock) |
| Aspiration precautions                                      | Rapid sequence intubation supervised by experienced providers, elevated head of the bed, oral care with chlorhexidine, gastric acid neutralization in those not receiving tube feeds.                           |
| Adequate empiric antimicrobial treatment and source control | According to suspected site of infection, health care exposure, and immune suppression                                                                                                                          |
| Limiting fluid overload                                     | Modified ARDSNet FACTT protocol after early shock (first 12 hours)                                                                                                                                              |
| Restrictive transfusion                                     | Hemoglobin target > 7 g/dL in the absence of acute bleeding and/or ischemia                                                                                                                                     |
| Appropriate handoff of patients at risk                     | Providers taking care of patients at risk who require ICU admission will complete a structured handoff to the ICU team to continue with CLIP protocol for the duration of ICU stay                              |

CLIP = checklist for lung injury prevention, PEEP = positive end-expiratory pressure, FiO<sub>2</sub> = fraction of inspired oxygen concentration, ARDSNet = Acute Respiratory Distress Syndrome Network, FACTT = fluid and catheter treatment trial, ICU = intensive care unit

1  
2  
3  
4  
5  
6  
7  
8  
9  
10  
11  
12  
13  
14  
15  
16  
17  
18  
19  
20  
21  
22  
23  
24  
25  
26  
27  
28  
29  
30  
31  
32  
33  
34  
35  
36  
37  
38  
39  
40  
41  
42  
43  
44  
45  
46  
47  
48  
49

For peer review only

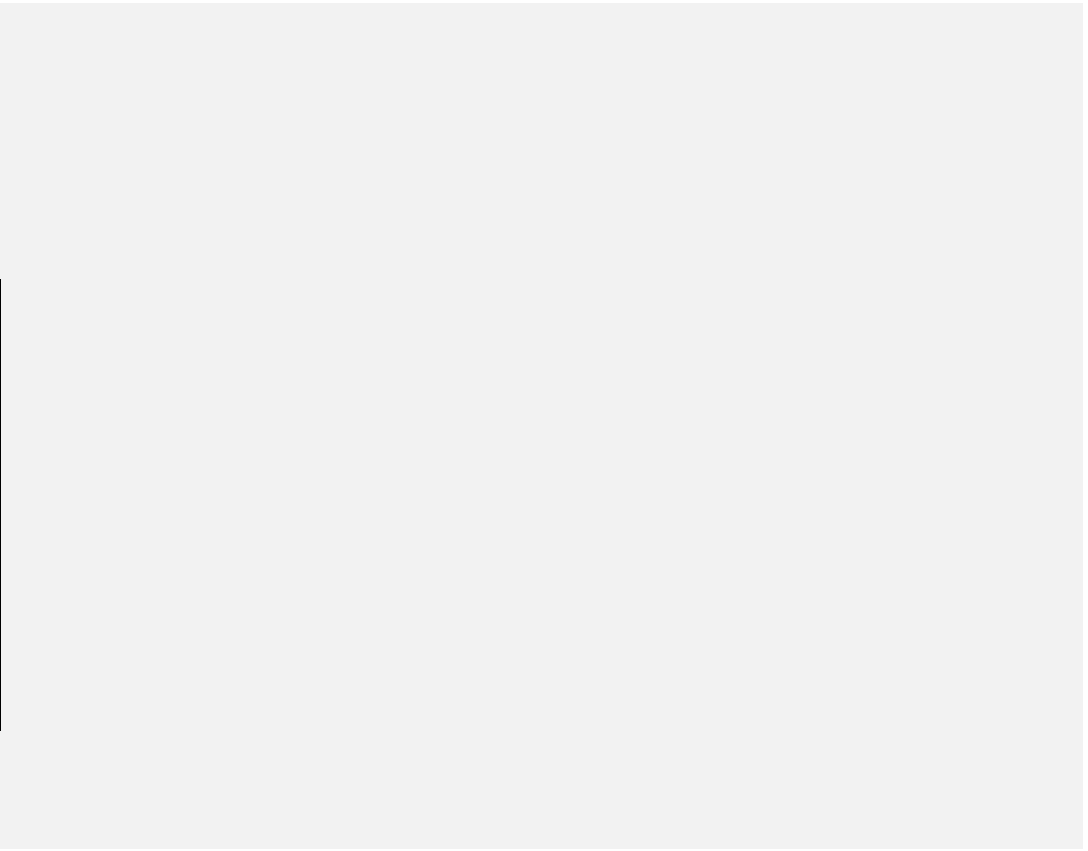

Table 3: Schedule of Events

| Event                                             | Time of presentation until first dose (screen / baseline) | First dose until end of that calendar day (Day 1) | Day 2 | Day 3 | Day 4 | Day 5 | Day 6 | Day 7 | 7 days after last dose | Hospital discharge or study Day 28, whichever comes first | 6 Months | 12 Months |
|---------------------------------------------------|-----------------------------------------------------------|---------------------------------------------------|-------|-------|-------|-------|-------|-------|------------------------|-----------------------------------------------------------|----------|-----------|
| Informed consent                                  | X                                                         |                                                   |       |       |       |       |       |       |                        |                                                           |          |           |
| Inclusion/exclusion criteria                      | X                                                         |                                                   |       |       |       |       |       |       |                        |                                                           |          |           |
| Pregnancy test in women of childbearing potential | X                                                         |                                                   |       |       |       |       |       |       |                        |                                                           |          |           |
| Demographics                                      | X                                                         |                                                   |       |       |       |       |       |       |                        |                                                           |          |           |
| Medical history                                   | X                                                         |                                                   |       |       |       |       |       |       |                        |                                                           |          |           |
| LIPS score                                        | X                                                         |                                                   |       |       |       |       |       |       |                        |                                                           |          |           |
| Randomization                                     | X                                                         |                                                   |       |       |       |       |       |       |                        |                                                           |          |           |
| Study drug administration                         |                                                           | X                                                 | X     | X     | X     | X     | X     | X     |                        |                                                           |          |           |
| Clinical outcome assessment                       | X                                                         | X                                                 | X     | X     | X     | X     | X     | X     |                        |                                                           |          |           |
| Safety labs: Cr and Hb                            | x                                                         |                                                   | X     | X     | X     | X     | X     | X     |                        |                                                           |          |           |
| Clinical data as available: labs, ABG             | X                                                         | X                                                 | X     | X     | X     | X     | X     | X     |                        |                                                           |          |           |
| CXR / ABG*                                        |                                                           | X                                                 | X     | X     | X     | X     | X     | X     |                        |                                                           |          |           |
| CLIP                                              | X                                                         | X                                                 | X     | X     | X     | X     | X     | X     |                        |                                                           |          |           |
| AE/SAE monitoring                                 |                                                           | X                                                 | X     | X     | X     | X     | X     | X     | X                      | X                                                         |          |           |

|                           |   |  |   |   |  |  |  |  |  |   |   |   |
|---------------------------|---|--|---|---|--|--|--|--|--|---|---|---|
| Survival                  |   |  |   |   |  |  |  |  |  | X |   | X |
| Plasma biomarkers of ALI  | X |  | X | X |  |  |  |  |  |   |   |   |
| SF-12                     | X |  |   |   |  |  |  |  |  |   | X | X |
| Barthel Index             | X |  |   |   |  |  |  |  |  |   | X | X |
| Vulnerable Elders Survey  | X |  |   |   |  |  |  |  |  | X | X |   |
| Brussels / SOFA composite |   |  |   |   |  |  |  |  |  | X |   |   |

\*Chest x-ray required on days 1-7 ONLY IF patient is intubated, and DOES NOT have ALI / ARDS already, AND there is clinical evidence of worsening respiratory status defined as:

- o Previous P/F ratio  $\geq 300$ , with current P/F ratio  $< 300$  and no chest x-ray within 24 hours.
- o Prior P/F ratio  $< 300$  and the PF ratio has fallen more than 10% AND no chest x-ray within 24 hours.
- o In cases where an ABG is not available, the research team should obtain an ABG *only if* the S/F ratio falls below 315 consistently. The P/F ratio obtained from that ABG will be used to determine whether a chest x-ray needs to be obtained (as per criteria outlined above).
- o If change in P/F ratio triggers the need for a chest x-ray or ABG as above, sites have 24 hours to conduct the necessary procedure. An ABG or chest x-ray obtained by the clinical team during that time period is also acceptable and obviates the need to obtain said procedure for the research study.

LIPS = Lung injury prevention, ALI = acute lung injury, LIS = lung injury severity score, Cr = creatinine, Hb = hemoglobin, ABG = arterial blood gas, CLIP = checklist for lung injury prevention, AE = adverse events, SAE = serious adverse events, SF-12 = 12-Item Short-Form Health Survey, SOFA = sequential organ failure assessment.

Table 4: Plasma biomarkers in ALI/ARDS

| Plasma Biomarker                                    | Importance in ALI/ARDS Development                       | Associated outcomes other than ALI/ARDS                    |
|-----------------------------------------------------|----------------------------------------------------------|------------------------------------------------------------|
| Surfactant protein-D[44-46]                         | Reflect injury and ↑ permeability of alveolar epithelium | VFD, organ failure                                         |
| Receptor for advanced glycation end products[47-49] | Reflects endothelial activation and injury               | VFD,[49] organ failure,[49] ARDS after lung transplant[47] |
| Intercellular adhesion molecule-1[44, 50-53]        | Reflects endothelial activation and injury               | VFD,[51] organ failure[51]                                 |
| Interleukin-6[44, 54-56]                            | Inflammation                                             | VFD,[55] organ failure[55]                                 |
| Interleukin-8[44, 48, 50, 54-56]                    | Inflammation                                             | VFD, [55]organ failure[55]                                 |
| Plasminogen activator inhibitor-1[44, 50, 57-61]    | Activation of coagulation and inhibition of fibrinolysis | VFD,[61] organ failure[61]                                 |
| von Willebrand factor[44, 48, 60, 62, 63]           | Reflects endothelial activation and injury               | organ failure                                              |
| Protein C[44, 50, 59, 61, 64]                       | Activation of coagulation and inhibition of fibrinolysis | ARDS after lung transplant,[47] VFD,[61] organ failure[61] |

ALI = acute lung injury, ARDS = acute respiratory distress syndrome, VFD = ventilator-free days.

## REFERENCES

1. Rubenfeld GD, Caldwell E, Peabody E, et al. Incidence and outcomes of acute lung injury. *N Engl J Med* 2005;**353**:1685-93.
2. Li G, Malinchoc M, Cartin-Ceba R, et al. Eight-year trend of acute respiratory distress syndrome: a population-based study in Olmsted County, Minnesota. *Am J Resp Crit Care Med* 2011;**183**:59-66.
3. Erickson SE, Martin GS, Davis JL, et al. Recent trends in acute lung injury mortality: 1996-2005. *Crit Care Med* 2009;**37**:1574-9.
4. Herridge MS, Tansey CM, Matté A, et al. Functional disability 5 years after acute respiratory distress syndrome. *N Engl J Med* 2011;**364**:1293-304.
5. Hudson LD, Milberg JA, Anardi D, et al. Clinical risks for development of the acute respiratory distress syndrome. *Am J Respir Crit Care Med* 1995;**151**:293-301.
6. Fowler AA, Hamman RF, Good JT, et al. Adult respiratory distress syndrome: risk with common predispositions. *Ann Intern Med* 1983;**98**:593-7.
7. Gong MN, Thompson BT, Williams P, et al. Clinical predictors of and mortality in acute respiratory distress syndrome: potential role of red cell transfusion. *Crit Care Med* 2005;**33**:1191-8.
8. Gajic O, Dabbagh O, Park PK, et al. Early identification of patients at risk of acute lung injury: evaluation of lung injury prediction score in a multicenter cohort study. *Am J Respir Crit Care Med* 2010;**183**:462-70.
9. Zarbock A, Ley K. The role of platelets in acute lung injury (ALI). *Front Biosci* 2009;**14**:150-8.



10. Zarbock A, Polanowska-Grabowska RK, Ley K. Platelet-neutrophil-interactions: linking hemostasis and inflammation. *Blood Rev* 2007;**21**:99-111.
11. Looney MR, Nguyen JX, Hu Y, et al. Platelet depletion and aspirin treatment protect mice in a two-event model of transfusion-related acute lung injury. *J Clin Invest* 2009;**119**:3450-61.
12. El Kebir D, József L, Pan W, et al. 15-epi-lipoxin A4 inhibits myeloperoxidase signaling and enhances resolution of acute lung injury. *Am J Respir Crit Care Med* 2009;**180**:311-9.
13. Fukunaga K, Kohli P, Bonnans C, et al. Cyclooxygenase 2 plays a pivotal role in the resolution of acute lung injury. *J Immunol* 2005;**174**:5033-9.
14. Maderna P, Godson C. Lipoxins: resolutionary road. *Br J Pharmacol* 2009;**158**:947-59.
15. Chelucci GL, Boncinelli S, Marsili M, et al. Aspirin effect on early and late changes in acute lung injury in sheep. *Intensive Care Med* 1993;**19**:13-21.
16. Sigurdsson GH, Vallengren S, Christenson JT. Influence of aspirin and steroids on acute lung injury after i.v. injection of a sclerosing agent. *Acta Chir Scand* 1989;**155**:163-70.
17. Yasuda O, Takemura Y, Kawamoto H, et al. Aspirin: recent developments. *Cell Mol Life Sci* 2008;**65**:354-8.
18. Jin SW, Zhang L, Lian QQ, et al. Posttreatment with aspirin-triggered lipoxin A4 analog attenuates lipopolysaccharide-induced acute lung injury in mice: the role of heme oxygenase-1. *Anesth Analg* 2007;**104**:369-77.
19. Tabuchi A, Kuebler WM. Endothelium-platelet interactions in inflammatory lung disease. *Vasc Pharmacol* 2008;**49**:141-50.

- 1  
2  
3  
4  
5  
6  
7  
8  
9  
10  
11  
12  
13  
14  
15  
16  
17  
18  
19  
20  
21  
22  
23  
24  
25  
26  
27  
28  
29  
30  
31  
32  
33  
34  
35  
36  
37  
38  
39  
40  
41  
42  
43  
44  
45  
46  
47  
48  
49  
50  
51  
52  
53  
54  
55  
56  
57  
58  
59  
60
20. Grommes J, Alard J-E, Drechsler M, et al. Disruption of platelet-derived chemokine heteromers prevents neutrophil extravasation in acute lung injury. *Am J Resp Crit Care Med* 2012;**185**:628-36.
  21. Clark SR, Ma AC, Tavener SA, et al. Platelet TLR4 activates neutrophil extracellular traps to ensnare bacteria in septic blood. *Nature Med* 2007;**13**:463-9.
  22. Narasaraju T, Yang E, Samy RP, et al. Excessive neutrophils and neutrophil extracellular traps contribute to acute lung injury of influenza pneumonitis. *Am J Pathol* 2011;**179**:199-210.
  23. Erlich JM, Talmor DS, Cartin-Ceba R, et al. Prehospitalization antiplatelet therapy is associated with a reduced incidence of acute lung injury. A population-based cohort study. *Chest* 2011;**139**:289-95.
  24. Kor DJ, Erlich J, Gong MN, et al. Association of prehospitalization aspirin therapy and acute lung injury: results of a multicenter international observational study of at-risk patients. *Crit Care Med* 2011;**39**:2393-400.
  25. Patrono C, Garcia Rodriguez LA, Landolfi R, et al. Low-dose aspirin for the prevention of atherothrombosis. *N Engl J Med* 2005;**353**:2373-83.
  26. Chiang N, Bermudez EA, Ridker PM, et al. Aspirin triggers antiinflammatory 15-epi-lipoxin A4 and inhibits thromboxane in a randomized human trial. *Proc Natl Acad Sci USA* 2004;**101**:15178-83.
  27. Bernard GR, Artigas A, Brigham KL, et al. The American-European Consensus Conference on ARDS. Definitions, mechanisms, relevant outcomes, and clinical trial coordination. *Am J Respir Crit Care Med* 1994;**149**:818-24.

- 1
- 2
- 3
- 4
- 5
- 6
- 7
- 8
- 9
- 10
- 11
- 12
- 13
- 14
- 15
- 16
- 17
- 18
- 19
- 20 28. Rubenfeld GD. Interobserver variability in applying a radiographic definition for ARDS. *Chest* 1999;**116**:1347-53.
- 21
- 22 29. Pocock SJ, Simon R. Sequential treatment assignment with balancing for prognostic factors in the controlled clinical trial. *Biometrics* 1975;**31**:103-15.
- 23
- 24 30. Diggle P, Liang K, Zeger S. Analysis of Longitudinal Data. New York: Oxford University Press, Inc.; 1994.
- 25
- 26 31. Spragg RG, Bernard GR, Checkley W, et al. Beyond mortality: future clinical research in acute lung injury. *Am J Respir Crit Care Med* 2010;**181**:1121-7.
- 27
- 28 32. Gajic O, Dara SI, Mendez JL, et al. Ventilator-associated lung injury in patients without acute lung injury at the onset of mechanical ventilation. *Crit Care Med* 2004;**32**:1817-24.
- 29
- 30 33. Rana R, Fernandez-Perez ER, Khan SA, et al. Transfusion-related acute lung injury and pulmonary edema in critically ill patients: a retrospective study. *Transfusion* 2006;**46**:1478-83.
- 31
- 32 34. Gajic O, Rana R, Winters JL, et al. Transfusion-related acute lung injury in the critically ill: prospective nested case-control study. *Am J Respir Crit Care Med* 2007;**176**:886-91.
- 33
- 34 35. Gajic O, Rana R, Mendez JL, et al. Acute lung injury after blood transfusion in mechanically ventilated patients. *Transfusion* 2004;**44**:1468-74.
- 35
- 36 36. Gajic O, Frutos-Vivar F, Esteban A, et al. Ventilator settings as a risk factor for acute respiratory distress syndrome in mechanically ventilated patients. *Intensive Care Med* 2005;**31**:922-6.
- 37
- 38 37. Gajic O, Dziki WH, Toy P. Fresh frozen plasma and platelet transfusion for nonbleeding patients in the intensive care unit: benefit or harm? *Crit Care Med* 2006;**34**:S170-3.
- 39
- 40
- 41
- 42
- 43
- 44
- 45
- 46
- 47
- 48
- 49
- 50
- 51
- 52
- 53
- 54
- 55
- 56
- 57
- 58
- 59
- 60

- 1  
2  
3  
4  
5  
6  
7  
8  
9  
10  
11  
12  
13  
14  
15  
16  
17  
18  
19  
20  
21  
22  
23  
24  
25  
26  
27  
28  
29  
30  
31  
32  
33  
34  
35  
36  
37  
38  
39  
40  
41  
42  
43  
44  
45  
46  
47  
48  
49  
50  
51  
52  
53  
54  
55  
56  
57  
58  
59  
60
38. Fernandez-Perez ER, Keegan MT, Brown DR, et al. Intraoperative tidal volume as a risk factor for respiratory failure after pneumonectomy. *Anesthesiology* 2006;**105**:14-8.
39. Khan H, Belsher J, Yilmaz M, et al. Fresh-frozen plasma and platelet transfusions are associated with development of acute lung injury in critically ill medical patients. *Chest* 2007;**131**:1308-14.
40. Hou P, Cohen J, Elie-Turenne M, et al. A survey on behalf of USCITG-LIPS investigators: toward standardization of a checklist for lung injury prevention (CLIP). *Crit Care Med* 2010;**38**:576.
41. Brower RG, Lanken PN, MacIntyre N, et al. Higher versus lower positive end-expiratory pressures in patients with the acute respiratory distress syndrome. *N Engl J Med* 2004;**351**:327-36.
42. Wiedemann HP, Wheeler AP, Bernard GR, et al. Comparison of two fluid-management strategies in acute lung injury. *N Engl J Med* 2006;**353**:2564-75.
43. Gerrah R, Elami A, Stampler A, et al. Preoperative aspirin administration improves oxygenation in patients undergoing coronary artery bypass grafting. *Chest* 2005;**127**:1622-6.
44. Ware LB, Koyama T, Billheimer DD, et al. Prognostic and pathogenetic value of combining clinical and biochemical indices in patients with acute lung injury. *Chest* 2010;**137**:288-96.
45. Eisner M, Parsons P, Matthay M, et al. Plasma surfactant protein levels and clinical outcomes in patients with acute lung injury. *Thorax* 2003;**58**:983-8.

- 1  
2  
3  
4  
5  
6  
7  
8  
9  
10  
11  
12  
13  
14  
15  
16  
17  
18  
19  
20  
21  
22  
23  
24  
25  
26  
27  
28  
29  
30  
31  
32  
33  
34  
35  
36  
37  
38  
39  
40  
41  
42  
43  
44  
45  
46  
47  
48  
49  
50  
51  
52  
53  
54  
55  
56  
57  
58  
59  
60
46. Greene KE, Wright JR, Steinberg KP, et al. Serial changes in surfactant-associated proteins in lung and serum before and after onset of ARDS. *Am J Respir Crit Care Med* 1999;**160**:1843-50.
47. Christie JD, Shah CV, Kawut SM, et al. Plasma levels of receptor for advanced glycation end products, blood transfusion, and risk of primary graft dysfunction. *Am J Respir Crit Care Med* 2009;**180**:1010-5.
48. Fremont RD, Koyama T, Calfee CS, et al. Acute lung injury in patients with traumatic injuries: utility of a panel of biomarkers for diagnosis and pathogenesis. *J Trauma* 2010;**68**:1121-7.
49. Calfee CS, Ware LB, Eisner MD, et al. Plasma receptor for advanced glycation end products and clinical outcomes in acute lung injury. *Thorax* 2008;**63**:1083-9.
50. McClintock D, Zhuo H, Wickersham N, et al. Biomarkers of inflammation, coagulation and fibrinolysis predict mortality in acute lung injury. *Crit Care* 2008;**12**:R41.
51. Calfee CS, Eisner MD, Parsons PE, et al. Soluble intercellular adhesion molecule-1 and clinical outcomes in patients with acute lung injury. *Intensive Care Med* 2009;**35**:248-57.
52. Agouridakis P, Kyriakou D, Alexandrakis MG, et al. The predictive role of serum and bronchoalveolar lavage cytokines and adhesion molecules for acute respiratory distress syndrome development and outcome. *Respir Res* 2002;**3**:25.
53. Covarrubias M, Ware LB, Kawut SM, et al. Plasma intercellular adhesion molecule-1 and von Willebrand factor in primary graft dysfunction after lung transplantation. *Am J Transplant* 2007;**7**:2573-8.

- 1  
2  
3  
4  
5  
6  
7  
8  
9  
10  
11  
12  
13  
14  
15  
16  
17  
18  
19  
20  
21  
22  
23  
24  
25  
26  
27  
28  
29  
30  
31  
32  
33  
34  
35  
36  
37  
38  
39  
40  
41  
42  
43  
44  
45  
46  
47  
48  
49  
50  
51  
52  
53  
54  
55  
56  
57  
58  
59  
60
54. Bouros D, Alexandrakis MG, Antoniou KM, et al. The clinical significance of serum and bronchoalveolar lavage inflammatory cytokines in patients at risk for acute respiratory distress syndrome. *BMC Pulm Med* 2004;4:6.
55. Parsons PE, Eisner MD, Thompson BT, et al. Lower tidal volume ventilation and plasma cytokine markers of inflammation in patients with acute lung injury. *Crit Care Med* 2005;33:1-6.
56. Meduri GU, Headley S, Kohler G, et al. Persistent elevation of inflammatory cytokines predicts a poor outcome in ARDS. Plasma IL-1 beta and IL-6 levels are consistent and efficient predictors of outcome over time. *Chest* 1995;107:1062-73.
57. Prabhakaran P, Ware LB, White KE, et al. Elevated levels of plasminogen activator inhibitor-1 in pulmonary edema fluid are associated with mortality in acute lung injury. *Am J Physiol Lung Cell Mol Physiol* 2003;285:L20-8.
58. Ware LB, Fang X, Matthay MA. Protein C and thrombomodulin in human acute lung injury. *Am J Physiol Lung Cell Mol Physiol* 2003;285:L514-21.
59. Christie JD, Robinson N, Ware LB, et al. Association of protein C and type 1 plasminogen activator inhibitor with primary graft dysfunction. *Am J Respir Crit Care Med* 2007;175:69-74.
60. Ware LB, Conner ER, Matthay MA. von Willebrand factor antigen is an independent marker of poor outcome in patients with early acute lung injury. *Crit Care Med* 2001;29:2325-31.
61. Ware LB, Matthay MA, Parsons PE, et al. Pathogenetic and prognostic significance of altered coagulation and fibrinolysis in acute lung injury/acute respiratory distress syndrome. *Crit Care Med* 2007;35:1821-8.

1  
2  
3  
4  
5  
6  
7  
8  
9  
10  
11  
12  
13  
14  
15  
16  
17  
18  
19  
20  
21  
22  
23  
24  
25  
26  
27  
28  
29  
30  
31  
32  
33  
34  
35  
36  
37  
38  
39  
40  
41  
42  
43  
44  
45  
46  
47  
48  
49  
50  
51  
52  
53  
54  
55  
56  
57  
58  
59  
60

For

62. Rubin DB, Wiener-Kronish JP, Murray JF, et al. Elevated von Willebrand factor antigen is an early plasma predictor of acute lung injury in nonpulmonary sepsis syndrome. *J Clin Invest* 1990;**86**:474-80.

63. Ware LB, Eisner MD, Thompson BT, et al. Significance of von Willebrand factor in septic and nonseptic patients with acute lung injury. *Am J Respir Crit Care Med* 2004;**170**:766-72.

64. Matthay MA, Ware LB. Plasma protein C levels in patients with acute lung injury: prognostic significance. *Crit Care Med* 2004;**32**:S229-32.

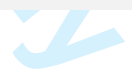

1  
2  
3  
4  
5  
6  
7  
8  
9  
10  
11  
12  
13  
14  
15  
16  
17  
18  
19  
20  
21  
22  
23  
24  
25  
26  
27  
28  
29  
30  
31  
32  
33  
34  
35  
36  
37  
38  
39  
40  
41  
42  
43  
44  
45  
46  
47  
48  
49  
50  
51  
52  
53  
54  
55  
56  
57  
58  
59  
60

Appendix A. Lung Injury Prevention Study with Aspirin (LIPS-A) Coordinating Center Personnel and Site Investigators

| Coordinating Centers                                    |                                                                                                                              |
|---------------------------------------------------------|------------------------------------------------------------------------------------------------------------------------------|
| Clinical Coordinating Center                            | Daniel S. Talmor MD, MPH<br>Valerie M. Banner-Goodspeed, ALB                                                                 |
| Data and Statistical Coordinating Center                | Ognjen Gajic, MD, MSc, FCCP, FCCM<br>Daryl J. Kor, MD<br>Rickey E. Carter, PhD<br>Richard Hinds, BS, MS, RRT                 |
| Biospecimen Repository and Knowledge Translation Center | Michelle N. Gong MD, MS<br>Graciela Soto, MD                                                                                 |
| Clinical Sites                                          |                                                                                                                              |
| Beth Israel Deaconess Medical Center                    | Daniel Talmor, MD, MPH<br>Michael Howell MD, MPH                                                                             |
| Bridgeport Hospital                                     | David Kaufman, MD                                                                                                            |
| Brigham and Womens Hospital                             | Peter Hou, MD                                                                                                                |
| Duke University Medical Center                          | Bruce D. Levy, MD<br>Ian Welshy, BSc, MBBS<br>Heatherlee Bailey, MD, FAAEM, FCCM                                             |
| Harborview Medical Center                               | Timothy R. Watkins, MD MSc                                                                                                   |
| Massachusetts General Hospital                          | Ednan Bajwa, MD, MPH<br>Christopher Kabrhel, MD                                                                              |
| Mayo Clinic – Florida                                   | Emir Festic, MD<br>Augustine Lee, MD                                                                                         |
| Mayo Clinic – Rochester                                 | Ognjen Gajic, MD<br>Daryl Kor, MD<br>Rahul Kashyap, MBBS<br>Leanne Clifford, MBBS                                            |
| Montefiore Medical Center                               | Michelle Gong, MD<br>Graciela Soto, MD                                                                                       |
| University of Florida Medical Center                    | Marie-Carmelle Elie, MD<br>Hassan Almuamat, MD                                                                               |
| University of Illinois College of Medicine              | Ruxana Sadikot, MD, MRCP, FCCP                                                                                               |
| University of Louisville Medical Center                 | Ozan Akca, MD, FCCM<br>Rodrigo Cavallazzi, MD<br>Melissa Platt, MD                                                           |
| University of Michigan                                  | Pauline Park, MD<br>Jill Cherry-Bukowiec, MD, MS<br>Lena Napolitano, MD<br>Krishnan Raghavendran, MD<br>John Younger, MD, MS |
| Wake Forest University Medical Center                   | Jason Hoth, MD                                                                                                               |





Illustration of the potential role of aspirin, lipoxins, and aspirin-triggered lipoxins on the mediators of ALI development and progression. Black arrows indicate events in ALI. Grey arrows indicate action of ASA, LXs, or ATLs.

ALI = acute lung injury, ARDS = acute respiratory distress syndrome, ASA = aspirin, LX = lipoxins, ATLs = aspirin-triggered lipoxins, IL-6 = interleukin-6, TNF = tumor necrosis factor, NF-κB = nuclear factor kappa-light-chain-enhancer of activated B-cells, I-κB = nuclear factor kappa-light-chain-enhancer of activated B-cells inhibitor, HO = heme oxygenase, ICAM = intercellular adhesion molecule

172x157mm (72 x 72 DPI)

1  
2  
3  
4  
5  
6  
7  
8  
9  
10  
11  
12  
13  
14  
15  
16  
17  
18  
19  
20  
21  
22  
23  
24  
25  
26  
27  
28  
29  
30  
31  
32  
33  
34  
35  
36  
37  
38  
39  
40  
41  
42  
43  
44  
45  
46  
47  
48  
49  
50  
51  
52  
53  
54  
55  
56  
57  
58  
59  
60

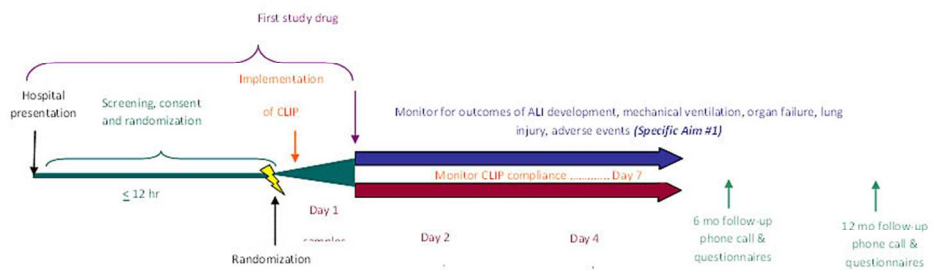

Schematic of the planned study procedures  
327x109mm (72 x 72 DPI)

peer review only

For submission to: BMJ Open

6-4-2012

A/Groups/CCS/Robin/Kor/Manuscript/Aspirin Therapy in ALI/lung injury prevention with aspirin\_MBJOpen.docx

**LUNG INJURY PREVENTION WITH ASPIRIN (LIPS-A): A PROTOCOL FOR A  
MULTICENTER RANDOMIZED CLINICAL TRIAL IN MEDICAL PATIENTS AT HIGH RISK  
FOR ACUTE LUNG INJURY.**

Daryl J. Kor, MD, Assistant Professor of Anesthesiology, Mayo Clinic College of Medicine, Rochester, MN

Daniel S. Talmor MD, MPH, Associate Professor of Anesthesiology, Harvard Medical School, Boston, MA

Valerie M. Banner-Goodspeed, ALB, Clinical Trial Specialist, Beth Israel Deaconess Medical Center, Boston, MA

Rickey E. Carter, PhD, Associate Professor of Biostatistics, Mayo Clinic College of Medicine, Rochester, MN

Richard Hinds, BS, MS, RRT; Department of Anesthesiology, Mayo Clinic, Rochester, MN

Pauline K. Park, MD, Associate Professor of Surgery, University of Michigan School of Medicine, Ann Arbor, MI

Ognjen Gajic, MD, MSc, FCCP, FCCM, Professor of Medicine, Mayo Clinic College of Medicine, Rochester, MN

Michelle N. Gong MD, MS, Associate Professor of Medicine, Albert Einstein College of Medicine, Bronx, NY

On behalf of the US Critical Illness and Injury Trials Group: Lung Injury Prevention with Aspirin Study Group (USCIITG: LIPS-A).

This study is supported by Grant Numbers U01-HL108712-01, KL2 RR024151, and the Mayo Clinic Critical Care Research Committee. This protocol is registered with ClinicalTrials.gov, registration number NCT01504867.

**Keywords:** acute lung injury, acute respiratory distress syndrome, aspirin, critical illness, prevention, clinical trial.

**Word Count:**

Address correspondence requests to:

Daryl J. Kor, M.D.  
Mayo Clinic, 200 First Street SW  
Rochester, MN 55905  
507-255-6051 / Fax 507-255-4267

1  
2  
3 [kor.daryl@mayo.edu](mailto:kor.daryl@mayo.edu)  
4  
5  
6  
7  
8  
9  
10  
11  
12  
13  
14  
15  
16  
17  
18  
19  
20  
21  
22  
23  
24  
25  
26  
27  
28  
29  
30  
31  
32  
33  
34  
35  
36  
37  
38  
39  
40  
41  
42  
43  
44  
45  
46  
47  
48  
49  
50  
51  
52  
53  
54  
55  
56  
57  
58  
59  
60

For peer review only

## ABSTRACT

**Introduction:** Acute Lung Injury (ALI) is a devastating condition that places a heavy burden on public health resources. Although the need for effective ALI prevention strategies is increasingly recognized, no effective preventative strategies exist. The Lung Injury Prevention Study with Aspirin (LIPS-A) aims to test whether aspirin (ASA) could prevent and/or mitigate the development of ALI.

**Methods and Analysis:** LIPS-A is a multicenter, double-blind, randomized clinical trial testing the hypothesis that the early administration of ASA will result in a reduced incidence of ALI in adult patients at high risk. This investigation will enroll 400 study participants from 14 hospitals across the US. Conditional logistic regression will be used to test the primary hypothesis that early ASA administration will decrease the incidence of ALI.

**Ethics and Dissemination:** Safety oversight will be under the direction of an independent data and safety monitoring board (DSMB). Approval of the protocol was obtained from the DSMB prior to enrolling the first study participant. Approval of both the protocol and informed consent documents were also obtained from the institutional review board of each participating institution prior to enrolling study participants at the respective site.

In addition to providing important clinical and mechanistic information, this investigation will inform the scientific merit and feasibility of a phase III trial on aspirin as an ALI prevention agent. The findings of this investigation, as well as associated ancillary studies, will be disseminated in the form of oral and abstract presentations at major national and international medical specialty meetings. The primary objective and other significant findings will also be presented in manuscript form. All final, published manuscripts resulting from this protocol will be submitted to Pub Med Central (PMC) in accordance with the National Institute of Health

1  
2  
3 Public Access Policy. This trial is registered with ClinicalTrials.gov: NCT01504867.  
4  
5  
6  
7  
8  
9  
10  
11  
12  
13  
14  
15  
16  
17  
18  
19  
20  
21  
22  
23  
24  
25  
26  
27  
28  
29  
30  
31  
32  
33  
34  
35  
36  
37  
38  
39  
40  
41  
42  
43  
44  
45  
46  
47  
48  
49  
50  
51  
52  
53  
54  
55  
56  
57  
58  
59  
60

For peer review only

## INTRODUCTION

Acute lung injury (ALI) and the acute respiratory distress syndrome (ARDS) are life-threatening syndromes which continue to consume substantial health care resources and profoundly impact patient-important outcomes.[1] Although recent epidemiologic studies suggest the incidence of lung injury may be on the decline,[2] even conservative estimates suggest the associated mortality continues to exceed 25%.[3] Beyond mortality, an episode of ALI/ARDS also substantially influences patient's long-term outcomes with functional deficits persisting up to five years after the episode of respiratory failure.[4]

Importantly, the clinical syndrome of ALI generally occurs as a complication of an initial predisposing acute injury such as pneumonia, aspiration, sepsis, trauma, shock, or massive transfusion.[5] However, only a fraction of patients (10-30%) with these initial injuries develop ALI/ARDS.[6, 7] Only 30% of ALI patients fulfill criteria for ALI within six hours of presentation to the emergency department (ED).[8] The majority of patients develop ALI a median of two days after hospital presentation (IQR 1-4 days). This period of time between hospital presentation and development of ALI presents a window of opportunity for interventions to prevent the development of ALI.

Recently, accumulating evidence suggests an important role for platelets in both ALI pathogenesis [9-11] and resolution.[12-14] Notably, preclinical data suggests that aspirin (ASA) can modulate many of the platelet-mediated processes involved in ALI development [11, 15, 16] and resolution.[17, 18] Proposed mechanisms for these protective effects include reduced thromboxane A<sub>2</sub>,[9] P-selectin,[19] and platelet-derived chemokine (e.g. CCL5, CXCL4) [20] production, prevention of the formation of platelet-neutrophil aggregates[9] and neutrophil extracellular traps,[21, 22] and enhanced formation of anti-inflammatory lipid mediators such as

1  
2  
3 15-epi-lipoxin A4 (Figure 1).[17] Importantly, recent observational studies have also suggested  
4 a potential preventive role for antiplatelet therapy in patients at high risk for ALI.[23, 24]  
5  
6 However, the evidence remains inconclusive and equipoise remains.  
7  
8  
9

10 To further enhance our understanding of ASA's role in the prevention and/or mitigation  
11 of ALI, the Lung Injury Prevention Study (LIPS) group with the support of the United States  
12 Critical Illness and Injury Trials Group (USCIITG) as well as the National Heart, Lung and  
13 Blood Institute (NHLBI) have designed the Lung Injury Prevention Study with Aspirin (LIPS-  
14 A), a randomized clinical trial that aims to test the safety and efficacy of ASA in the prevention  
15 of ALI in patients determined to be at high risk. This paper describes the study procedures and  
16 planned analyses for this clinical trial.  
17  
18  
19  
20  
21  
22  
23  
24  
25

## 26 **METHODS AND ANALYSIS**

### 27 **Administrative Structure**

28  
29 To facilitate the conduct of the present investigation, as well as future ALI prevention  
30 studies, three specialized centers were established. The data and statistical coordinating center,  
31 responsible for data management, randomization, and pharmacy coordination, will reside at  
32 Mayo Clinic in Rochester, MN. The clinical coordinating center (CCC), responsible for the  
33 study conduct and safety monitoring, will reside at Beth Israel Deaconess Medical Center in  
34 Boston, MA. The biospecimen repository and Knowledge Translation Center, responsible for  
35 specimen management as well as the LIPS score and the checklist for lung injury prevention  
36 (CLIP) online screening tools, will reside at Montefiore Medical Center in Bronx, NY. The  
37 principal investigators from these three centers form the LIPS-A Executive Committee. This  
38 committee will collaboratively oversee all aspects of the study design and the protocol  
39 implementation.  
40  
41  
42  
43  
44  
45  
46  
47  
48  
49  
50  
51  
52  
53  
54  
55  
56  
57  
58  
59  
60



## Study Design

To test the hypothesis that ASA is associated with a reduced rate of incident ALI, the LIPS-A group has designed a multicenter, double-blind, placebo-controlled, parallel group, phase II randomized clinical trial. The ClinicalTrials.gov registration number is NCT01504867. An outline of the study design and study procedures appears in Figure 2.

## Study Population

Adult patients aged 18 years and older at high risk for ALI on admission to the hospital will be enrolled. To facilitate the identification of those at high risk for ALI, the LIPS-A study will utilize the recently validated LIPS.[8] Patients will be considered at high risk for development of ALI based on a LIPS score of 4 or greater. Patients who fulfill criteria for ALI on hospital presentation or at any point prior to randomization will be excluded. A full list of exclusion criteria with the justification for each can be seen in Table 1.

Patients will be recruited from 14 clinical sites in the United States with experience in the identification and management of ALI. A full list of the participating institutions as well as each site's primary investigator can be seen in Appendix A and are indexed on ClinicalTrials.gov. The resulting study population is expected to be diverse and representative of the general population of patients at risk for ALI such that the study findings will be externally valid and generalizable to the broader academic community.

To facilitate patient enrollment, study coordinators at each participating institution will screen patients in the ED with a web-based LIPS calculator to determine each potential participant's risk for development of ALI. Eligible patients with a LIPS score  $\geq 4$  will be approached by study coordinators or study investigators for informed consent. Eligible patients will be enrolled and randomized within 12 hours of hospital presentation. This will allow for

1  
2  
3 maximal recruitment within the window of opportunity for interventions to prevent ALI  
4  
5 development as our preliminary data show median time to ALI is two days after hospital  
6  
7 admission.[8]  
8  
9

## 10 **Interventions**

11  
12 Study drug: The first dose of study drug (ASA versus placebo) will be administered  
13  
14 within the first 24 hours after presentation to the hospital, either by mouth or by nasogastric or  
15  
16 orogastric tube. For patients randomized to the intervention arm, a generic aspirin 325 mg one-  
17  
18 time loading dose on day 1 will be administered followed by generic aspirin 81 mg by mouth  
19  
20 once daily for study days 2-7 or until hospital discharge or death, whichever occurs first. The  
21  
22 intervention duration of seven days was chosen because > 85% of ALI/ARDS cases were noted  
23  
24 to have developed during this time frame in our preliminary studies.[8] In support of the dosing  
25  
26 scheme chosen for this investigation, a randomized clinical trial noted low-dose ASA at 81 mg  
27  
28 daily was effective in elevating plasma levels of anti-inflammatory lipoxins and inhibiting  
29  
30 platelet thromboxane activity with only a slight increase in effect at higher doses of ASA.[25, 26]  
31  
32  
33 All study medication doses (active treatment with ASA and placebo) will be in powder form of  
34  
35 identical color, contained within capsules that can be opened and administered via a gastric tube.  
36  
37  
38

39  
40 Co-interventions: Important co-interventions will be standardized in all study patients.  
41  
42 To this end, the investigative team has developed a web-based, computerized, interactive tool to  
43  
44 standardize essential elements of care delivery such as mechanical ventilation, aspiration  
45  
46 precautions, infection control, fluid management and transfusion in patients at risk. This tool is a  
47  
48 checklist for lung injury prevention (CLIP).[2] A summary of the CLIP elements is listed in  
49  
50 Table 2. Having identified high-risk patients early in the course of the illness with the LIPS  
51  
52 calculation and having standardized the important elements of care delivery with the CLIP, we  
53  
54  
55  
56  
57  
58  
59  
60

1  
2  
3 expect to have optimized our ability to investigate whether ASA is a safe and effective agent in  
4 preventing ALI.  
5  
6

7  
8 Related conditions and variables of interest: Additional conditions and variables of  
9 interest including pertinent baseline demographics and clinical characteristics such as age, sex,  
10 race, comorbidities, and all LIPS elements will also be recorded. Additional variables of note  
11 will include vital signs and laboratory values that are obtained during the course of routine care,  
12 APACHE IV scores, coadministration of statins, angiotensin converting enzyme-inhibitors and  
13 angiotensin-receptor blocking agents, insulin, amiodarone, or steroids; blood product  
14 administration, daily fluid status and vasopressor requirements. A full description of the  
15 schedule of events for this study protocol can be seen in Table 3.  
16  
17  
18  
19  
20  
21  
22  
23  
24  
25

## 26 27 **Outcomes**

28  
29 Clinical Outcomes: The primary outcome is the development of ALI within seven days  
30 of hospital admission. ALI will be defined as requirement for invasive mechanical ventilation  
31 and fulfillment of the American-European consensus definition for ALI/ARDS.[27] Patients will  
32 be screened daily for respiratory failure and the partial pressure of arterial oxygen (PaO<sub>2</sub>) to  
33 fraction of inspired oxygen (FiO<sub>2</sub>) ratio will be calculated daily for those on mechanical  
34 ventilation. Patients ventilated with non-invasive ventilation will not be considered ALI/ARDS  
35 as our preliminary data showed that the majority (90%) of ALI patients are eventually  
36 intubated.[8] Investigators at each site will review structured online training for assessment of  
37 ALI as was used and described in the LIPS.[8] In addition, de-identified chest x-rays of the first  
38 five patients enrolled at each site will be sent to CCC for validation by the primary investigators.  
39 Any site with significant deviation will be re-trained. Each participating center's principal  
40 investigator will adjudicate the diagnosis of ALI/ARDS using standardized definitions. Patients  
41  
42  
43  
44  
45  
46  
47  
48  
49  
50  
51  
52  
53  
54  
55  
56  
57  
58  
59  
60

1  
2  
3 receiving invasive mechanical ventilation who, within a given 24-hour period, fulfill criteria for  
4  
5 PaO<sub>2</sub>/FiO<sub>2</sub> < 300 mm Hg, bilateral infiltrates consistent with ALI and not completely explained  
6  
7 by heart failure, will be determined to have developed ALI. Given prior data suggesting poor  
8  
9 agreement in the radiological interpretation of bilateral infiltrates on chest radiographs consistent  
10  
11 with ALI,[28] a secondary review of all ALI cases and a random sample of non-ALI cases will  
12  
13 be performed by an independent expert investigator who is blinded to the initial ALI/ARDS  
14  
15 adjudication. Study participants who die or are discharged from the hospital prior to day 7, and  
16  
17 had not met criteria for ALI at the time of death or discharge, will be adjudicated as not having  
18  
19 developed ALI.  
20  
21  
22  
23

24  
25 Secondary clinical outcome assessments will include changes in the lung injury score and  
26  
27 sequential organ failure assessment score, as well as the number of ventilator-free days at  
28  
29 hospital day 28 and intensive care unit (ICU) and hospital lengths of stay. Mortality will be  
30  
31 assessed at discharge from the ICU, from the hospital, and at 28 days. In addition, hospital  
32  
33 survivors will undergo a brief follow-up phone survey to assess functional status (Barthel Index),  
34  
35 health related quality of life [QOL (SF-12)] and frailty (VES-13) at 6- and 12-months after  
36  
37 enrollment.  
38  
39

40  
41 Mechanistic Outcomes: Secondary analyses will include evaluations of the mechanisms  
42  
43 by which anti-platelet agents (e.g., ASA) may modulate the development and progression of lung  
44  
45 injury as well as a determination of the value of plasma biomarkers of lung injury in the  
46  
47 prediction of ALI development in patients at risk (beyond clinical variables). The study will  
48  
49 examine biomarkers previously found to be associated with the *development* of ALI/ARDS in at-  
50  
51 risk individuals (Table 4). In addition, to better understand the mechanisms by which ASA may  
52  
53 affect the development and progression of ALI, the study will also examine the effect of ASA on  
54  
55  
56  
57  
58  
59  
60

1  
2  
3 ASA-triggered lipoxins, plasma thromboxane, and platelet-neutrophil aggregates. As it is likely  
4  
5 that other important biomarkers in ALI may be identified in the future, plasma from consenting  
6  
7 patients will be banked at the biorepository for future studies. Blood samples will be obtained at  
8  
9 baseline (after randomization and before initiation of study intervention), on day two of study  
10  
11 (approximately 24 hours after the first dose of study drug), and on day four of study (any time  
12  
13 during day 4). For patients who provide consent relating to future genetic analyses, appropriate  
14  
15 samples will be obtained.  
16  
17  
18  
19

### 20 **Sample Size Estimation**

21  
22 The primary hypothesis for this investigation is that ASA (when compared to placebo)  
23  
24 will result in a lower rate of incident ALI at day 7 following randomization. To adequately  
25  
26 address this hypothesis, the sample size is estimated to be 200 participants per group (400 total).  
27  
28 The assumptions involved in this calculation include the following: 1) the hypothesized placebo  
29  
30 response rate will be 18%,<sup>[8]</sup> 2) the minimum clinically relevant effect is 10 percentage points,  
31  
32 and 3) the type I error rate ( $\alpha$ ) = 0.10 (two-sided) (final  $\alpha$ =0.0889 after interim analysis  
33  
34 and 50% information fraction using O'Brien-Fleming-like alpha spending function). To be  
35  
36 conservative during sample size estimation, the null proportion was shifted upwards to 25% (i.e.,  
37  
38 towards the region of maximum binomial variance) so that the initial sample size estimates are  
39  
40 based on 25% vs. 15%. A chi-square test of proportions at the  $\alpha$  = 0.10 level of significance  
41  
42 will have 80% power to detect the 10 percentage point difference with 197 participants per  
43  
44 group. Overall recruitment is rounded to 200 participants per group (400 total) to allow for  
45  
46 minor attrition, although attrition is not expected to affect the ascertainment of primary outcome.  
47  
48 At the hypothesized level of 18% vs. 8% and with the alpha adjusted for multiple interim looks,  
49  
50 power with 200 participants per group is 90%. Thus, for the primary analysis 400 total  
51  
52  
53  
54  
55  
56  
57  
58  
59  
60

1  
2  
3 participants randomized 1:1 to placebo or ASA is anticipated to yield sufficient power to detect a  
4  
5 clinically relevant difference in the incidence of ALI.  
6  
7

8 The Data and Statistical Coordinating Center will prepare weekly reports on the accrual  
9  
10 process for the trial. The reports, which will be reviewed on the weekly executive committee  
11  
12 calls, will include summarization of screening and randomization metrics. Detailed descriptions  
13  
14 of exclusion criteria for disqualified study candidates will be provided and reviewed as well.  
15  
16 Each clinical center has a target enrollment of 2 randomized participants per month. The reports  
17  
18 will include a comparison of observed vs. expected accrual, by clinical center and overall for the  
19  
20 trial. The randomization performance of each clinical center will be disseminated monthly to all  
21  
22 study personnel through a study newsletter. If site-specific enrollment concerns are identified,  
23  
24 methods for addressing these issues will be evaluated by the executive committee working with  
25  
26 the site of interest. If a more pervasive and sustained gap between expected and observed  
27  
28 participant accrual is identified, potential modifications to the inclusion and exclusion criteria of  
29  
30 the protocol will be discussed. Any amendments to the inclusion and/or exclusion criteria  
31  
32 deemed necessary by the executive committee will require approval by the DSMB as well as the  
33  
34 IRB of each participating institution before implementation. If enrollment remains below plan,  
35  
36 the inclusion of additional clinical sites will be considered as well.  
37  
38  
39  
40  
41  
42

### 43 **Randomization and Blinding**

44  
45 LIPS-A will utilize centralized randomization software hosted by the Data and Statistical  
46  
47 Coordinating Center. Randomization through the electronic data management system will be  
48  
49 enabled upon electronic verification of inclusion and exclusion criteria and enrollment of the  
50  
51 study participant by the clinical site investigators. Enrolled participants will be randomized in a  
52  
53 1:1 ratio to the ASA or placebo treatment arm using dynamic minimization[29] with a second  
54  
55  
56  
57  
58  
59  
60

1  
2  
3 guess probability of 0.2. Randomization will be stratified by center. To maintain the double  
4  
5 blind for the study, only the research pharmacist at each center will have electronic access to the  
6  
7 unblinded treatment code for study medication preparation and dispensing. The rest of the site  
8  
9 investigators and coordinating centers will be blinded to the actual treatment assignment.  
10  
11  
12 Emergency unblinding is available both electronically and through dispensing records at each  
13  
14 pharmacy.  
15  
16

17  
18 In the event the electronic randomization system is not functioning, the research  
19  
20 pharmacist at each center has a sealed emergency randomization kit to enable offline  
21  
22 randomization. A manual of operation governs the use of the emergency randomization process.  
23  
24 Briefly, prior to use of the emergency process, approval of the coordinating centers is required.  
25  
26 All attempts will be made to recover the system prior to the use of the offline procedure. Should  
27  
28 the offline procedure be used, the electronic data management system will be updated to reflect  
29  
30 the treatment assignment using the identification number contained within the randomization kit.  
31  
32  
33

### 34 **Statistical Methods**

35  
36 Conditional logistic regression will be used to test the primary hypothesis that early ASA  
37  
38 administration will decrease the rate of ALI development. Clinical site will be treated as the  
39  
40 stratification variable and conditioned out of the estimating equations. This approach is optimal  
41  
42 in a clinical trial setting as it provides a test of null hypothesis that the ALI incidence is equal in  
43  
44 the two treatment group and estimates the association in the event the null hypothesis is rejected  
45  
46 (through the conditional odds ratio estimate). SAS PROC LOGISTIC™ (Cary, NC) will be used  
47  
48 for estimation of the primary model.  
49  
50  
51  
52

53  
54 This analysis will be supplemented by the Cochran-Mantel-Haenszel stratified analysis  
55  
56 with odds ratios computed for each site. The Breslow-Day test will be used to examine the data  
57  
58  
59  
60

1  
2  
3 for potential effect modification (i.e., a “site effect”). In the event there is significant site-to-site  
4  
5  
6  
7  
8  
9  
10  
11  
12  
13  
14  
15  
16  
17  
18  
19  
20  
21  
22  
23  
24  
25  
26  
27  
28  
29  
30  
31  
32  
33  
34  
35  
36  
37  
38  
39  
40  
41  
42  
43  
44  
45  
46  
47  
48  
49  
50  
51  
52  
53  
54  
55  
56  
57  
58  
59  
60

for potential effect modification (i.e., a “site effect”). In the event there is significant site-to-site variability in the estimated effect, stratified results will be reported for this phase II study. Evidence of heterogeneity of response at this phase of the study will yield invaluable preliminary data for the planning of future changes.

Planned interim analyses will be conducted at 50% of study participants enrolled. With the O’Brien-Fleming-like stopping boundaries, a final adjusted alpha of 0.08885 is anticipated; however, the final value may be changed depending on unplanned interim analyses (conducted at the request of the Data and Safety Monitoring Board [DSMB]) or slight deviations from the anticipated information milestones (0.50, 1.0). Stopping boundaries will be estimated using the LD Bounds package for the R system.

For the remaining continuous and dichotomous secondary endpoints, treatment group comparisons will be performed with respect to clinical outcomes as well as important prognostic factors at screening, baseline, and individual follow-up time points during the study duration. For continuous variables (e.g., age, weight, and laboratory assays), linear model techniques including *t*-tests, analysis of variance and analysis of covariance will be applied. Nonparametric procedures (e.g., the Wilcoxon rank sum test), will be used if data are not normally distributed and transformations of the data are not considered useful. Standard techniques for categorical data will be applied, including Fisher’s exact test, Pearson  $\chi^2$  procedures, weighted least squares, and logistic regression analysis.

Longitudinal (or serially measured) endpoints will be evaluated by generalized linear models and linear mixed. Repeated measure analyses of binary endpoints will be analyzed using generalized estimating equations methods which do not require imputation of missing values, provided the data are ignorable missing.[30] Continuous dependent variables will utilize the



1  
2  
3 mixed model approach with emphasis on evaluating the trajectories of values over time.  
4  
5  
6 However, early improvement in these parameters may suggest a supportive, stabilizing role for  
7  
8 ASA as a treatment option in patients at high risk of ALI. For the primary analysis, the clinical  
9  
10 center will be treated as a “nuisance” parameter and conditioned out of the estimation routine.  
11  
12 For secondary analyses, the clinical center will be used as a fixed covariate to account for  
13  
14 differences across sites.  
15  
16

17  
18 The safety endpoints (see below under “**Adverse Outcomes**”) will be examined for all  
19  
20 participants in the safety evaluable analysis set. Safety endpoints will include expected clinical  
21  
22 events, including death, for this patient population and summarized by treatment group. Also, all  
23  
24 serious and unexpected adverse events will be summarized by treatment group. Fisher’s exact  
25  
26 test will be used to estimate treatment differences in the incidence of each specified adverse  
27  
28 event. No adjustments will be made for multiple hypothesis evaluations of safety endpoints.  
29  
30 Adverse events will be summarized with groupings by body system. Other safety data (e.g., labs  
31  
32 and assay data) will be listed, and when appropriate, summarized in tabular or graphical format.  
33  
34  
35

### 36 37 **Data Quality and Management**

38  
39 This investigation will utilize the Medidata Rave™ system for data management and  
40  
41 storage as well as to assist with the randomization procedures. This product has been designed  
42  
43 to facilitate multicenter clinical trials conducted under 21 CFR Part 11 requirements. This  
44  
45 secure, web-based system provides robust data validation routines, custom reporting and  
46  
47 straightforward integration with statistical software packages such as SAS (utilized for this  
48  
49 investigation). The system is coupled with an integrated randomization module that uses a  
50  
51 multidimensional dynamic allocation algorithm to minimize imbalances across multiple  
52  
53  
54  
55  
56  
57  
58  
59  
60

1  
2  
3 dimensions including overall study, sites, factors and cross-factor strata. Specific details  
4  
5 regarding the randomization process are given below.  
6  
7

## 8 **ETHICS AND DISSEMINATION**

### 9 **Adverse Outcomes**

10  
11  
12  
13 Safety data including adverse events such as gastrointestinal ulcers, bleeding from any  
14 site, gastrointestinal discomfort, wheezing, rash, hives, angioedema, tinnitus, and mortality will  
15 be recorded. Adverse events will be defined as “unexpected,” “expected,” and “serious.” As our  
16 patient population is by definition “critically ill,” it is expected that they will have a number of  
17 unrelated adverse health events during the course of their hospital stay. Therefore, we will limit  
18 the scope of our adverse event monitoring and recording to the following:  
19  
20  
21  
22  
23  
24  
25  
26  
27

28 1) Serious adverse events (SAEs) will be defined as:

- 29  
30  
31 • Death, *believed to be related to the study medication or procedures, or a death that is*  
32 *unexpected considering the acuity of a patient.*  
33  
34
- 35  
36 • A life threatening experience *believed to be related to the study medication or*  
37 *procedures*  
38  
39
- 40  
41 • Persistent or significant disability or incapacity *that is of greater frequency or severity*  
42 *than what would be normally expected in the course of critical illness.*  
43  
44
- 45  
46 • An event that jeopardizes the human subject and may require medical or surgical  
47 treatment to prevent one of the preceding outcomes *and is not expected in the course of*  
48 *critical illness.*  
49  
50  
51

52 2) Adverse events possibly related to aspirin administration will be defined as:

- 53  
54  
55 • Anaphylaxis / allergic reaction  
56  
57  
58  
59  
60

- 1
- 2
- 3
- 4 • Gastrointestinal bleed / bleeding complications
- 5
- 6 • Transfusion requirements for suspected bleeding
- 7
- 8 • Acute kidney injury, defined as RIFLE stage “I” or greater
- 9
- 10
- 11 • Tinnitus
- 12
- 13 • Reye’s syndrome
- 14

### 15 **Role of the Data Safety and Monitoring Board**

16 Reporting of SAEs will be conducted through the CCC. All centers will report SAEs  
17 within 24 hours of discovering the presence of the SAE. The CCC will report all potentially  
18 related SAEs to the DSMB and to NHLBI within 7 days of discovery. A summary report of the  
19 events will be provided to the DSMB prior to each DSMB meeting, at least every six months.  
20 Safety oversight will be under the direction of a DSMB whose members will be independent  
21 from the study operations. The safety endpoints will be examined for all eligible patients who  
22 sign informed consent and are enrolled in the study on an intent-to-treat basis. Safety endpoints  
23 will include expected clinical events, including death, for this patient population and summarized  
24 by treatment group. All serious and unexpected adverse events will be summarized by treatment  
25 group as well.  
26  
27  
28  
29  
30  
31  
32  
33  
34  
35  
36  
37  
38  
39  
40

### 41 **Ethics Approval**

42 Approval of the protocol was obtained from the data safety and monitoring board as well  
43 as from NHLBI prior to enrolling the first study participant. In addition, approval of both the  
44 protocol and informed consent documents was required and obtained from the institutional  
45 review board of each participating institution prior to enrolling study participants at the  
46 respective study site. To ensure that each participating institution’s informed consent  
47 documentation complied with NHLBI requirements and the Code of Federal Regulations Title 21  
48  
49  
50  
51  
52  
53  
54  
55  
56  
57  
58  
59  
60

1  
2  
3 Part 50 Section 50.25, all informed consent forms were reviewed and approved by the CCC.  
4  
5 Official documentation of all IRB approvals and all finalized informed consent forms have been  
6  
7 collected and stored by the CCC.  
8  
9

### 10 **Considerations for Continuation to a Phase III Clinical Trial**

11  
12 The decision to proceed with a phase III trial is formally outlined as follows:

13  
14 1) Initiate Phase III Study: Demonstrated efficacy signal in addition to adequate safety profile.

15  
16 Criteria: Early termination for benefit at interim analysis or  $p < 0.08885$  at final analysis  
17  
18 (alpha=0.10 for study). Serious adverse event profile of ASA not statistically worse than placebo  
19  
20 (95% confidence interval for the relative risk of any SAE covers the null value of RR=1.0).  
21  
22

23  
24 2) Further Development Potentially Required: Weak efficacy signal. Criteria: Primary endpoint  
25  
26 did not achieve *a priori* level of significance but there were at least a general consistency of  
27  
28 secondary endpoints indicating propensity for efficacy with a larger sample size and/or more  
29  
30 specific primary endpoint.  
31  
32

33  
34 3) Abandon Treatment Platform: Harm (in efficacy or safety endpoints). Criteria: Study  
35  
36 terminated early per recommendation by DSMB for safety and/or risk/benefit ratio concerns (i.e.,  
37  
38 stop for futility, harm, unacceptable risk profile, etc.).  
39  
40

### 41 **Ancillary Studies**

42  
43 The LIPS-A group will encourage investigator-initiated ancillary study proposals that  
44  
45 extend or complement the specific aims of the primary LIPS-A trial. As policy, all proposals  
46  
47 will be reviewed by a separate Ancillary Studies and Publications Committee, both to ensure  
48  
49 consistency with the goals and conduct of the main study and evaluate scientific merit and  
50  
51 validity. Proposed studies may utilize data and/or samples already accrued during the LIPS-A  
52  
53 trial or, when feasible, request additional data collection from participating sites. The  
54  
55  
56  
57  
58  
59  
60

1  
2  
3  
4  
5  
6  
7  
8  
9  
10  
11  
12  
13  
14  
investigative and statistical plan will be reviewed *a priori*, with committee approval required before analysis begins. Where equivocal, review decisions will be referred to the LIPS-A Executive Committee. All reports, manuscripts or presentations derived from data obtained through the ancillary study process will require review and approval by the Ancillary Studies and Publications Committee prior to submission.

### 15 16 17 18 19 20 21 22 23 24 25 26 27 28 29 30 31 32 33 34 35 36 37 38 39 40 41 42 **Protocol funding and role of the funding sources**

This study is supported by the National Institutes of Health-National Heart Lung and Blood Institute (Grant Number U01-HL108712-01), the Mayo Clinic Center for Translational Science Activities (Grant Number KL2 RR024151), and the Mayo Clinic Critical Care Research Committee. Specifically, funding has been provided by each of these entities to support study personnel time and effort, protocol and data management development (Medidata Rave™), sample acquisition, processing and storage, and statistical support. These funding sources have had no specific influence on the scientific content of the study protocol. Similarly, the funding sources will have no direct role in the study conduct, nor data collection, analyses, or interpretation. The funding sources will also have no role in the writing or presentation of study results, nor decisions to submit for publication. The ultimate authority over each of these activities will be the executive committee of the LIPS-A study.

### 43 44 45 46 47 48 49 50 51 52 53 54 55 56 57 58 59 60 **DISCUSSION**

We have presented the study protocol and data analysis plans for the first phase II, multicenter randomized clinical trial that will test the efficacy and safety of a promising ALI prevention agent. Specifically, we have hypothesized that early administration of ASA to hospitalized patients who are at high risk for ALI, will be safe and will reduce the likelihood of progression to the full ALI phenotype. Secondly, this investigation will glean important

1  
2  
3 mechanistic data on ASA's impact on the pathways believed important in ALI pathogenesis as  
4 well as the potential value of relevant biomarkers in the prediction of subsequent development of  
5 ALI. Finally, the results of this study will provide essential information on both the scientific  
6 merit and feasibility of a larger, phase III trial testing the role of ASA in the prevention of lung  
7 injury.  
8  
9

10  
11  
12  
13  
14  
15 The persistent difficulty in translating promising pre-clinical therapies into the clinical  
16 setting has fostered interest in the potential development of effective ALI prevention strategies.  
17  
18 Indeed, prevention of ALI has been identified as a key strategic priority for invested parties such  
19 as the NHLBI.[31] However, implementation of protocols aiming to test potential ALI  
20 prevention strategies have been historically hindered by an inability to accurately predict who is  
21 at risk for ALI. Moreover, the typically short interval between risk exposure and development of  
22 ALI as well as the small proportion of patients who progress to the full ALI phenotype following  
23 an ALI-related exposure has limited the feasibility of ALI prevention studies. In addition, the  
24 historic lack of standardization for numerous important co-interventions that confound the  
25 associations of interest (e.g., ventilator management, transfusion and resuscitation practices) has  
26 also limited our ability to test preventative strategies.  
27  
28  
29  
30  
31  
32  
33  
34  
35  
36  
37  
38  
39

40  
41 To this end, the recently validated LIPS score is a key element of the herein described  
42 study protocol.[8] Specifically, the LIPS score is expected to facilitate the identification of  
43 patients at greatest risk of progressing to ALI (a LIPS score  $\geq 4$  is expected to identify a  
44 subgroup of patients who have a risk of progressing to ALI that is greater than 18%). In  
45 addition, it is notable that this ALI risk assessment tool was validated using data collected within  
46 the first 6 hours after the initial evaluation in the ED. In an ALI prevention protocol such as  
47  
48  
49  
50  
51  
52  
53  
54  
55  
56  
57  
58  
59  
60

1  
2  
3 described herein, where the time to randomization is limited to 12 hours from presentation to the  
4  
5 ED, the ability to accurately determine risk for ALI in such a time-efficient manner is critical.  
6  
7

8 A second notable strength of the current protocol is expected to be the implementation of  
9  
10 the CLIP for standardizing important co-interventions that may otherwise confound our  
11  
12 association of interest (ASA and ALI). During the period between hospital admission and the  
13  
14 development of ALI, health care delivery factors (timely treatment of infection and shock,  
15  
16 appropriate administration of fluid and transfusion therapies, prevention of aspiration, avoidance  
17  
18 of large tidal volume ventilation), may be as important as individual biology in determining ALI  
19  
20 development and outcome.[32-39] Moreover, a recent survey noted wide variation in clinical  
21  
22 practices such as the existence of a sepsis protocol, use of low tidal volume ventilation, positive  
23  
24 end-expiratory pressure, and restrictive transfusion practices, between hospitals and among the  
25  
26 ED, ICU and operating room within hospitals.[40] Thus, to effectively investigate preventive  
27  
28 strategies in ALI, the standardization of care delivery during the early phase of hospitalization  
29  
30 would appear critical. Indeed, the ARDSNet investigators have repeatedly shown the value of  
31  
32 standardization of clinical processes for ALI patients in clinical trials, allowing for determination  
33  
34 of incremental benefit of new interventions.[41, 42] In the current investigation, standardization  
35  
36 of care with best practices will help to reduce variability in the rates of ALI and the intensity of  
37  
38 lung injury (noise) due to inconsistencies in care delivery. The result is expected to be an  
39  
40 increased chance of seeing a beneficial clinical or biological effect from ASA and a better  
41  
42 assessment of the potential side effects of ASA in this population.  
43  
44  
45  
46  
47  
48  
49

50 Though the multicenter randomized clinical trial design, availability of a time-efficient  
51  
52 risk assessment tool (LIPS score) and the standardization of important co-interventions with  
53  
54 CLIP, as well as the robust study support and quality control offered through Metadata RAVE,  
55  
56  
57  
58  
59  
60

1  
2  
3 are clear strengths of the current study protocol, several important limitations with the planned  
4 investigation deserve note. Lung injury may be present at study entry even as clinical criteria for  
5 ALI are not fulfilled. Though a formal diagnosis of prevalent ALI is exclusionary, the molecular  
6 machinery will have been clearly set in motion in many of the study participants. Therefore, the  
7 study may be more accurately characterized as a prevention/early treatment trial rather than a  
8 pure prevention trial. Nonetheless, we have attempted to focus on the early period of ALI  
9 development by mandating a short interval from hospital presentation to randomization (12  
10 hours) and a similarly short interval from hospital presentation to administration of the first study  
11 dose (24 hours). In addition, the study will exclude patients who presented to an outside hospital  
12 ED more than 12 hours before arrival at the enrolling site's facility. The study will also exclude  
13 those with ALI on hospital presentation or prior to randomization as well as those who are  
14 receiving mechanical ventilation through a tracheostomy tube prior to the current hospital  
15 admission (patient who is ventilator dependent) or those with a history of interstitial lung disease  
16 with chronic pulmonary infiltrates that may mimic ALI.

17  
18  
19  
20  
21  
22  
23  
24  
25  
26  
27  
28  
29  
30  
31  
32  
33  
34  
35  
36  
37 A second limitation relates to the intervention of ASA administration. Specifically, it is  
38 now well documented that more than 10% of the population will have a variable response to  
39 ASA or at least some form of aspirin resistance.[17] These patients may not benefit from ASA,  
40 even if ASA can modulate the development of lung injury. However, as part of this study, we  
41 will measure plasma thromboxane, a sensitive indicator of ASA resistance, to determine the  
42 prevalence of ASA resistance in patients at high risk for ALI. As such, sensitivity analyses,  
43 stratifying study participants by ASA resistance (as determined by changes in thromboxane  
44 levels), may allow us to determine whether the effect of ASA on ALI development is isolated to  
45 those susceptible to the actions of ASA. A related concern is the potential influence of  
46  
47  
48  
49  
50  
51  
52  
53  
54  
55  
56  
57  
58  
59  
60



1  
2  
3 concomitant medications that may impact aspirin's ability to prevent or mitigate ALI (e.g.,  
4  
5 statins, corticosteroids). To address this concern, we will be collecting detailed information on  
6  
7 concomitant medications and, when necessary, appropriate statistical adjustments will be made.  
8  
9

10 A third potential limitation with this study relates to a previously recognized major  
11  
12 barrier to ALI prevention studies, namely feasibility. First and foremost, a substantial proportion  
13  
14 of the target population may be expected to be receiving ASA on presentation to the ED, an  
15  
16 exclusion criteria for the current protocol. Notably, however, our preliminary work suggests that  
17  
18 upwards of two-thirds of the target population was not on ASA prior to admission. We also note  
19  
20 that over the three months of the initial LIPS,[8] there were 800 patients who fulfilled study  
21  
22 inclusion criteria of LIPS score  $\geq 4$  and did not fulfill the exclusion criteria of pre-existing ASA  
23  
24 use, prevalent ALI, and elective surgery. Therefore, we believe that with 14 proposed sites and  
25  
26 two years of planned enrollment, we will successfully meet our enrollment goals of 400 total  
27  
28 patients. Also relating to feasibility, it is possible that some sites will be challenged by the short  
29  
30 time interval allowed for patient enrollment as well as the short time to study drug  
31  
32 administration. Though a valid concern, we believe the use of the LIPS score and the robust  
33  
34 support offered through Metadata<sup>TM</sup> RAVE will greatly facilitate the enrollment and  
35  
36 randomization procedures such that sites will indeed be successful in meeting these time-  
37  
38 sensitive challenges.  
39  
40  
41  
42  
43  
44  
45

46 A fourth and final limitation which deserves mention relates to the potential toxicity of  
47  
48 the intervention of interest. Generally, ASA is well tolerated even in acutely ill, hospitalized  
49  
50 patients in whom ASA is often continued during the hospitalization. As an example, in a study  
51  
52 of ASA use up to the time of cardiac surgery, its continuation was not associated with an  
53  
54 increase need for transfusion therapies.[43] Nevertheless, there may be injury associated with  
55  
56  
57  
58  
59  
60

1  
2  
3 the administration of aspirin. To address this concern, patients at risk for major complications  
4 from ASA therapy have been excluded from the study. Multiple stopping criteria for patients  
5 who experience adverse events have also been incorporated into the protocol. In addition, the  
6 more complete understanding of the safety profile of an intervention of interest is an important  
7 goal of all phase II trials. In this regard, the information gleaned from this study, adverse events  
8 included, is necessary to help decide on the merits of proceeding to a phase III clinical trial.  
9  
10  
11  
12  
13  
14  
15  
16  
17  
18  
19

## 20 CONCLUSION

21  
22 This manuscript describes the study protocol and analysis plans for the first phase II  
23 randomized clinical trial of the promising ALI prevention agent ASA. In addition to providing  
24 important information on the safety and efficacy of ASA in patients at high risk for ALI, the  
25 results of this trial will also inform the scientific community regarding the merit and feasibility  
26 of a more definitive phase III clinical trial. Importantly, the significance of this effort lies not  
27 only in the specific results which will be obtained from the study protocol, but equally in the  
28 infrastructure that will be created to facilitate the conduct of this trial. Specifically, the  
29 development and utilization of innovative methods to facilitate the early identification of high-  
30 risk patients with the LIPS and the standardization of potential confounding co-interventions  
31 with CLIP will address key barriers to studying ALI prevention measures and is expected to lay a  
32 framework for the meaningful conduct of future ALI prevention studies as well.  
33  
34  
35  
36  
37  
38  
39  
40  
41  
42  
43  
44  
45  
46  
47  
48  
49  
50  
51  
52  
53  
54  
55  
56  
57  
58  
59  
60

**Table 1.** Study Exclusion Criteria

| Exclusion Criteria                                                                                                                                                                                  | Justification                                                  |
|-----------------------------------------------------------------------------------------------------------------------------------------------------------------------------------------------------|----------------------------------------------------------------|
| Anti-platelet therapy on admission or within 7 days prior to admission                                                                                                                              | Inability to ethically randomize                               |
| Presented to outside hospital emergency department > 12 hours before arrival at site's facility                                                                                                     | Inability to enroll within time frame for possible benefit     |
| Inability to obtain consent and randomize within 12 hours of hospital presentation                                                                                                                  | Inability to enroll within time frame for possible benefit     |
| Admitted for elective or emergency surgery                                                                                                                                                          | Aspirin not found to benefit this group in preliminary studies |
| ALI on hospital presentation or prior to randomization                                                                                                                                              | Inability to adequately assess outcome                         |
| Presentation believed to be due to pure heart failure and no other known risk factors for ALI                                                                                                       | Inability to adequately assess outcome                         |
| Receiving mechanical ventilation through a tracheostomy tube prior to current hospital admission (patient who is ventilator dependent)                                                              | Inability to adequately assess outcome                         |
| Bilateral pulmonary infiltrates present on admission only if the patient has a history of interstitial lung disease that can reasonably explain the current degree of pulmonary infiltrates present | Inability to adequately assess outcome                         |
| Allergy to aspirin or NSAIDs                                                                                                                                                                        | Intervention contraindicated                                   |
| Bleeding disorder*                                                                                                                                                                                  | Intervention contraindicated                                   |
| Suspected active bleeding or judged to be at high risk for bleeding complications                                                                                                                   | Intervention contraindicated                                   |
| Presence of acute kidney injury <sup>#</sup>                                                                                                                                                        | Intervention contraindicated                                   |
| Severe chronic liver disease (Child-Pugh class C)                                                                                                                                                   | Intervention contraindicated                                   |

|                                                                                                                                                                                                                |                                                            |
|----------------------------------------------------------------------------------------------------------------------------------------------------------------------------------------------------------------|------------------------------------------------------------|
| Active peptic ulcer disease (within past 6 months)                                                                                                                                                             | Intervention contraindicated                               |
| Pregnancy or breast feeding                                                                                                                                                                                    | Intervention contraindicated                               |
| Inability to administer study drug                                                                                                                                                                             | Unable to administer study drug                            |
| Expected hospital stay < 48 hours                                                                                                                                                                              | Incomplete study procedures and outcome data               |
| Admitted for comfort or hospice care                                                                                                                                                                           | Incomplete study procedures and outcome data               |
| Patient, surrogate or physician not committed to full support (exception: a patient will not be excluded if he/she would receive all supportive care except for attempts at resuscitation from cardiac arrest) | Unable to assess primary outcome                           |
| Not anticipated to survive > 48 hours                                                                                                                                                                          | Incomplete study procedures and outcome data               |
| Previously enrolled in this trial                                                                                                                                                                              | Violates the statistical assumption of sample independence |
| Enrollment in concomitant intervention study                                                                                                                                                                   | Potential confounding and co-enrollment interactions       |

\*Any disorder with known associated with increased risk of bleeding. Common disorders may include thrombocytopenia, disseminated intravascular coagulation, hemophilia, von Willebrand disease, oral anticoagulant therapy, or advanced liver disease with associated coagulation disorders. Platelet count < 50,000 or absence of platelet count in the previous 24 hours to allow for assessment of platelet status.

# Acute kidney injury defined as “R” or greater according to RIFLE criteria. ALI = acute lung injury, NSAIDs = non-steroidal anti-inflammatory medications

**Table 2.** Elements of CLIP – Checklist for Lung Injury Prevention

| CLIP Elements                                               | Definition                                                                                                                                                                                                      |
|-------------------------------------------------------------|-----------------------------------------------------------------------------------------------------------------------------------------------------------------------------------------------------------------|
| Lung protective mechanical ventilation                      | Tidal volume between 6-8 mL/kg predicted body weight and plateau pressure < 30 cm H <sub>2</sub> O; PEEP ≥ 5 cm H <sub>2</sub> O, minimize FiO <sub>2</sub> (target oxygen saturation 88-92% after early shock) |
| Aspiration precautions                                      | Rapid sequence intubation supervised by experienced providers, elevated head of the bed, oral care with chlorhexidine, gastric acid neutralization in those not receiving tube feeds.                           |
| Adequate empiric antimicrobial treatment and source control | According to suspected site of infection, health care exposure, and immune suppression                                                                                                                          |
| Limiting fluid overload                                     | Modified ARDSNet FACTT protocol after early shock (first 12 hours)                                                                                                                                              |
| Restrictive transfusion                                     | Hemoglobin target > 7 g/dL in the absence of acute bleeding and/or ischemia                                                                                                                                     |
| Appropriate handoff of patients at risk                     | Providers taking care of patients at risk who require ICU admission will complete a structured handoff to the ICU team to continue with CLIP protocol for the duration of ICU stay                              |

CLIP = checklist for lung injury prevention, PEEP = positive end-expiratory pressure, FiO<sub>2</sub> = fraction of inspired oxygen concentration, ARDSNet = Acute Respiratory Distress Syndrome Network, FACTT = fluid and catheter treatment trial, ICU = intensive care unit

**Table 3:** Schedule of Events

| Event                                             | Time of presentation until first dose (screen / baseline) | First dose until end of that calendar day (Day 1) | Day 2 | Day 3 | Day 4 | Day 5 | Day 6 | Day 7 | 7 days after last dose | Hospital discharge or study Day 28, whichever comes first | 6 Months | 12 Months |
|---------------------------------------------------|-----------------------------------------------------------|---------------------------------------------------|-------|-------|-------|-------|-------|-------|------------------------|-----------------------------------------------------------|----------|-----------|
| Informed consent                                  | X                                                         |                                                   |       |       |       |       |       |       |                        |                                                           |          |           |
| Inclusion/exclusion criteria                      | X                                                         |                                                   |       |       |       |       |       |       |                        |                                                           |          |           |
| Pregnancy test in women of childbearing potential | X                                                         |                                                   |       |       |       |       |       |       |                        |                                                           |          |           |
| Demographics                                      | X                                                         |                                                   |       |       |       |       |       |       |                        |                                                           |          |           |
| Medical history                                   | X                                                         |                                                   |       |       |       |       |       |       |                        |                                                           |          |           |
| LIPS score                                        | X                                                         |                                                   |       |       |       |       |       |       |                        |                                                           |          |           |
| Randomization                                     | X                                                         |                                                   |       |       |       |       |       |       |                        |                                                           |          |           |
| Study drug administration                         |                                                           | X                                                 | X     | X     | X     | X     | X     | X     |                        |                                                           |          |           |
| Clinical outcome assessment                       | X                                                         | X                                                 | X     | X     | X     | X     | X     | X     |                        |                                                           |          |           |
| Safety labs: Cr and Hb                            | x                                                         |                                                   | X     | X     | X     | X     | X     | X     |                        |                                                           |          |           |
| Clinical data as available: labs, ABG             | X                                                         | X                                                 | X     | X     | X     | X     | X     | X     |                        |                                                           |          |           |
| CXR / ABG*                                        |                                                           | X                                                 | X     | X     | X     | X     | X     | X     |                        |                                                           |          |           |
| CLIP                                              | X                                                         | X                                                 | X     | X     | X     | X     | X     | X     |                        |                                                           |          |           |
| AE/SAE monitoring                                 |                                                           | X                                                 | X     | X     | X     | X     | X     | X     | X                      | X                                                         |          |           |

|                           |   |  |   |  |   |  |  |  |  |   |   |   |
|---------------------------|---|--|---|--|---|--|--|--|--|---|---|---|
| Survival                  |   |  |   |  |   |  |  |  |  | X |   | X |
| Plasma biomarkers of ALI  | X |  | X |  | X |  |  |  |  |   |   |   |
| SF-12                     | X |  |   |  |   |  |  |  |  |   | X | X |
| Barthel Index             | X |  |   |  |   |  |  |  |  |   | X | X |
| Vulnerable Elders Survey  | X |  |   |  |   |  |  |  |  | X | X |   |
| Brussels / SOFA composite |   |  |   |  |   |  |  |  |  | X |   |   |

\*Chest x-ray required on days 1-7 ONLY IF patient is intubated, and DOES NOT have ALI / ARDS already, AND there is clinical evidence of worsening respiratory status defined as:

- Previous P/F ratio  $\geq$  300, with current P/F ratio  $<$  300 and no chest x-ray within 24 hours.
- Prior P/F ratio  $<$  300 and the PF ratio has fallen more than 10% AND no chest x-ray within 24 hours.
- In cases where an ABG is not available, the research team should obtain an ABG **only if** the S/F ratio falls below 315 consistently. The P/F ratio obtained from that ABG will be used to determine whether a chest x-ray needs to be obtained (as per criteria outlined above).
- If change in P/F ratio triggers the need for a chest x-ray or ABG as above, sites have 24 hours to conduct the necessary procedure. An ABG or chest x-ray obtained by the clinical team during that time period is also acceptable and obviates the need to obtain said procedure for the research study.

LIPS = Lung injury prevention, ALI = acute lung injury, LIS = lung injury severity score, Cr = creatinine, Hb = hemoglobin, ABG = arterial blood gas, CLIP = checklist for lung injury prevention, AE = adverse events, SAE = serious adverse events, SF-12 = 12-Item Short-Form Health Survey, SOFA = sequential organ failure assessment.

**Table 4:** Plasma biomarkers in ALI/ARDS

| <b>Plasma Biomarker</b>                             | <b>Importance in ALI/ARDS Development</b>                | <b>Associated outcomes other than ALI/ARDS</b>             |
|-----------------------------------------------------|----------------------------------------------------------|------------------------------------------------------------|
| Surfactant protein-D[44-46]                         | Reflect injury and ↑ permeability of alveolar epithelium | VFD, organ failure                                         |
| Receptor for advanced glycation end products[47-49] | Reflects endothelial activation and injury               | VFD,[49] organ failure,[49] ARDS after lung transplant[47] |
| Intercellular adhesion molecule-1[44, 50-53]        | Reflects endothelial activation and injury               | VFD,[51] organ failure[51]                                 |
| Interleukin-6[44, 54-56]                            | Inflammation                                             | VFD,[55] organ failure[55]                                 |
| Interleukin-8[44, 48, 50, 54-56]                    | Inflammation                                             | VFD, [55]organ failure[55]                                 |
| Plasminogen activator inhibitor-1[44, 50, 57-61]    | Activation of coagulation and inhibition of fibrinolysis | VFD,[61] organ failure[61]                                 |
| von Willebrand factor[44, 48, 60, 62, 63]           | Reflects endothelial activation and injury               | organ failure                                              |
| Protein C[44, 50, 59, 61-64]                        | Activation of coagulation and inhibition of fibrinolysis | ARDS after lung transplant,[47] VFD,[61] organ failure[61] |

ALI = acute lung injury, ARDS = acute respiratory distress syndrome, VFD = ventilator-free days.

Funding Statement : Supported by National Institutes of Health

Competing Interest Statement: there are no competing interests

Contributorship Statement:

Daryl J. Kor has contributed to all aspects of the study design. Dr. Kor is the principal investigator at the Data and Statistical Coordinating Center.



1  
2  
3 Daniel Talmor has contributed to all aspect of the study design. Dr. Talmor is the principal  
4  
5 investigator at the Clinical Coordinating Center.  
6  
7  
8  
9

10 Valerie M. Banner-Goodspeed is the lead study coordinator at the Clinical Coordinating  
11  
12 Center. Ms. Banner-Goodspeed has contributed to all aspects of the study protocol design  
13  
14 as well as preparations for protocol implementation.  
15  
16  
17  
18  
19

20 Rickey E. Carter is the lead statistician for this protocol. He has been involved in all aspects  
21  
22 of the study design. He is the primary author of statistical descriptions in this manuscript.  
23  
24  
25  
26  
27

28 Richard Hinds is the lead study coordinator at the Data and Statistical Coordinating Center.  
29  
30 Mr. Hinds has contributed to all aspects of the study protocol design and preparations for  
31  
32 protocol implementation.  
33  
34  
35  
36  
37

38 Pauline Park has contributed in a consulting role to all aspects of the study design. Dr. Park  
39  
40 is the primary author of the sections of this manuscript which detail the protocol's plans  
41  
42 regarding ancillary studies.  
43  
44  
45  
46  
47

48 Ognjen Gajic has contributed to all aspects of the study design. Dr. Gajic is the principal  
49  
50 investigator for the grant mechanism that is the primary funding source for this protocol  
51  
52 (Grant Number U01-HL108712-01).  
53  
54  
55  
56  
57

58 Michelle N. Gong has contributed to all aspects of the study design. Dr. Gong is principal  
59  
60

1  
2  
3 investigator for the Biorepository and Knowledge Translation Center.  
4  
5  
6  
7

8 All named authors wrote or revised the manuscript and approved its final submitted  
9  
10 version.  
11  
12  
13  
14  
15  
16  
17  
18  
19  
20  
21  
22  
23  
24  
25  
26  
27  
28  
29  
30  
31  
32  
33  
34  
35  
36  
37  
38  
39  
40  
41  
42  
43  
44  
45  
46  
47  
48  
49  
50  
51  
52  
53  
54  
55  
56  
57  
58  
59  
60

For peer review only

## REFERENCES

1. Rubenfeld GD, Caldwell E, Peabody E, et al. Incidence and outcomes of acute lung injury. *N Engl J Med* 2005;**353**:1685-93.
2. Li G, Malinchoc M, Cartin-Ceba R, et al. Eight-year trend of acute respiratory distress syndrome: a population-based study in Olmsted County, Minnesota. *Am J Respir Crit Care Med* 2011;**183**:59-66.
3. Erickson SE, Martin GS, Davis JL, et al. Recent trends in acute lung injury mortality: 1996-2005. *Crit Care Med* 2009;**37**:1574-9.
4. Herridge MS, Tansey CM, Matté A, et al. Functional disability 5 years after acute respiratory distress syndrome. *N Engl J Med* 2011;**364**:1293-304.
5. Hudson LD, Milberg JA, Anardi D, et al. Clinical risks for development of the acute respiratory distress syndrome. *Am J Respir Crit Care Med* 1995;**151**:293-301.
6. Fowler AA, Hamman RF, Good JT, et al. Adult respiratory distress syndrome: risk with common predispositions. *Ann Intern Med* 1983;**98**:593-7.
7. Gong MN, Thompson BT, Williams P, et al. Clinical predictors of and mortality in acute respiratory distress syndrome: potential role of red cell transfusion. *Crit Care Med* 2005;**33**:1191-8.
8. Gajic O, Dabbagh O, Park PK, et al. Early identification of patients at risk of acute lung injury: evaluation of lung injury prediction score in a multicenter cohort study. *Am J Respir Crit Care Med* 2010;**183**:462-70.
9. Zarbock A, Ley K. The role of platelets in acute lung injury (ALI). *Front Biosci* 2009;**14**:150-8.

10. Zarbock A, Polanowska-Grabowska RK, Ley K. Platelet-neutrophil-interactions: linking hemostasis and inflammation. *Blood Rev* 2007;**21**:99-111.
11. Looney MR, Nguyen JX, Hu Y, et al. Platelet depletion and aspirin treatment protect mice in a two-event model of transfusion-related acute lung injury. *J Clin Invest* 2009;**119**:3450-61.
12. El Kebir D, József L, Pan W, et al. 15-epi-lipoxin A4 inhibits myeloperoxidase signaling and enhances resolution of acute lung injury. *Am J Respir Crit Care Med* 2009;**180**:311-9.
13. Fukunaga K, Kohli P, Bonnans C, et al. Cyclooxygenase 2 plays a pivotal role in the resolution of acute lung injury. *J Immunol* 2005;**174**:5033-9.
14. Maderna P, Godson C. Lipoxins: revolutionary road. *Br J Pharmacol* 2009;**158**:947-59.
15. Chelucci GL, Boncinelli S, Marsili M, et al. Aspirin effect on early and late changes in acute lung injury in sheep. *Intensive Care Med* 1993;**19**:13-21.
16. Sigurdsson GH, Vallgren S, Christenson JT. Influence of aspirin and steroids on acute lung injury after i.v. injection of a sclerosing agent. *Acta Chir Scand* 1989;**155**:163-70.
17. Yasuda O, Takemura Y, Kawamoto H, et al. Aspirin: recent developments. *Cell Mol Life Sci* 2008;**65**:354-8.
18. Jin SW, Zhang L, Lian QQ, et al. Posttreatment with aspirin-triggered lipoxin A4 analog attenuates lipopolysaccharide-induced acute lung injury in mice: the role of heme oxygenase-1. *Anesth Analg* 2007;**104**:369-77.
19. Tabuchi A, Kuebler WM. Endothelium-platelet interactions in inflammatory lung disease. *Vasc Pharmacol* 2008;**49**:141-50.

- 1  
2  
3  
4  
5  
6  
7  
8  
9  
10  
11  
12  
13  
14  
15  
16  
17  
18  
19  
20  
21  
22  
23  
24  
25  
26  
27  
28  
29  
30  
31  
32  
33  
34  
35  
36  
37  
38  
39  
40  
41  
42  
43  
44  
45  
46  
47  
48  
49  
50  
51  
52  
53  
54  
55  
56  
57  
58  
59  
60
20. Grommes J, Alard J-E, Drechsler M, et al. Disruption of platelet-derived chemokine heteromers prevents neutrophil extravasation in acute lung injury. *Am J Resp Crit Care Med* 2012;**185**:628-36.
  21. Clark SR, Ma AC, Tavener SA, et al. Platelet TLR4 activates neutrophil extracellular traps to ensnare bacteria in septic blood. *Nature Med* 2007;**13**:463-9.
  22. Narasaraju T, Yang E, Samy RP, et al. Excessive neutrophils and neutrophil extracellular traps contribute to acute lung injury of influenza pneumonitis. *Am J Pathol* 2011;**179**:199-210.
  23. Erlich JM, Talmor DS, Cartin-Ceba R, et al. Prehospitalization antiplatelet therapy is associated with a reduced incidence of acute lung injury. A population-based cohort study. *Chest* 2011;**139**:289-95.
  24. Kor DJ, Erlich J, Gong MN, et al. Association of prehospitalization aspirin therapy and acute lung injury: results of a multicenter international observational study of at-risk patients. *Crit Care Med* 2011;**39**:2393-400.
  25. Patrono C, Garcia Rodriguez LA, Landolfi R, et al. Low-dose aspirin for the prevention of atherothrombosis. *N Engl J Med* 2005;**353**:2373-83.
  26. Chiang N, Bermudez EA, Ridker PM, et al. Aspirin triggers antiinflammatory 15-epi-lipoxin A4 and inhibits thromboxane in a randomized human trial. *Proc Natl Acad Sci USA* 2004;**101**:15178-83.
  27. Bernard GR, Artigas A, Brigham KL, et al. The American-European Consensus Conference on ARDS. Definitions, mechanisms, relevant outcomes, and clinical trial coordination. *Am J Respir Crit Care Med* 1994;**149**:818-24.

- 1  
2  
3  
4  
5  
6  
7  
8  
9  
10  
11  
12  
13  
14  
15  
16  
17  
18  
19  
20  
21  
22  
23  
24  
25  
26  
27  
28  
29  
30  
31  
32  
33  
34  
35  
36  
37  
38  
39  
40  
41  
42  
43  
44  
45  
46  
47  
48  
49  
50  
51  
52  
53  
54  
55  
56  
57  
58  
59  
60
28. Rubenfeld GD. Interobserver variability in applying a radiographic definition for ARDS. *Chest* 1999;**116**:1347-53.
  29. Pocock SJ, Simon R. Sequential treatment assignment with balancing for prognostic factors in the controlled clinical trial. *Biometrics* 1975;**31**:103-15.
  30. Diggle P, Liang K, Zeger S. Analysis of Longitudinal Data. New York: Oxford University Press, Inc.; 1994.
  31. Spragg RG, Bernard GR, Checkley W, et al. Beyond mortality: future clinical research in acute lung injury. *Am J Respir Crit Care Med* 2010;**181**:1121-7.
  32. Gajic O, Dara SI, Mendez JL, et al. Ventilator-associated lung injury in patients without acute lung injury at the onset of mechanical ventilation. *Crit Care Med* 2004;**32**:1817-24.
  33. Rana R, Fernandez-Perez ER, Khan SA, et al. Transfusion-related acute lung injury and pulmonary edema in critically ill patients: a retrospective study. *Transfusion* 2006;**46**:1478-83.
  34. Gajic O, Rana R, Winters JL, et al. Transfusion-related acute lung injury in the critically ill: prospective nested case-control study. *Am J Respir Crit Care Med* 2007;**176**:886-91.
  35. Gajic O, Rana R, Mendez JL, et al. Acute lung injury after blood transfusion in mechanically ventilated patients. *Transfusion* 2004;**44**:1468-74.
  36. Gajic O, Frutos-Vivar F, Esteban A, et al. Ventilator settings as a risk factor for acute respiratory distress syndrome in mechanically ventilated patients. *Intensive Care Med* 2005;**31**:922-6.
  37. Gajic O, Dzvik WH, Toy P. Fresh frozen plasma and platelet transfusion for nonbleeding patients in the intensive care unit: benefit or harm? *Crit Care Med* 2006;**34**:S170-3.

- 1  
2  
3 38. Fernandez-Perez ER, Keegan MT, Brown DR, et al. Intraoperative tidal volume as a risk  
4 factor for respiratory failure after pneumonectomy. *Anesthesiology* 2006;**105**:14-8.  
5  
6  
7  
8 39. Khan H, Belsher J, Yilmaz M, et al. Fresh-frozen plasma and platelet transfusions are  
9 associated with development of acute lung injury in critically ill medical patients. *Chest*  
10 2007;**131**:1308-14.  
11  
12  
13 40. Hou P, Cohen J, Elie-Turenne M, et al. A survey on behalf of USCIITG-LIPS  
14 investigators: toward standardization of a checklist for lung injury prevention (CLIP). *Crit*  
15 *Care Med* 2010;**38**:576.  
16  
17  
18 41. Brower RG, Lanken PN, MacIntyre N, et al. Higher versus lower positive end-expiratory  
19 pressures in patients with the acute respiratory distress syndrome. *N Engl J Med*  
20 2004;**351**:327-36.  
21  
22  
23 42. Wiedemann HP, Wheeler AP, Bernard GR, et al. Comparison of two fluid-management  
24 strategies in acute lung injury. *N Engl J Med* 2006;**353**:2564-75.  
25  
26  
27 43. Gerrah R, Elami A, Stamler A, et al. Preoperative aspirin administration improves  
28 oxygenation in patients undergoing coronary artery bypass grafting. *Chest* 2005;**127**:1622-  
29 6.  
30  
31  
32 44. Ware LB, Koyama T, Billheimer DD, et al. Prognostic and pathogenetic value of  
33 combining clinical and biochemical indices in patients with acute lung injury. *Chest*  
34 2010;**137**:288-96.  
35  
36  
37 45. Eisner M, Parsons P, Matthay M, et al. Plasma surfactant protein levels and clinical  
38 outcomes in patients with acute lung injury. *Thorax* 2003;**58**:983-8.  
39  
40  
41  
42  
43  
44  
45  
46  
47  
48  
49  
50  
51  
52  
53  
54  
55  
56  
57  
58  
59  
60

- 1  
2  
3  
4  
5  
6  
7  
8  
9  
10  
11  
12  
13  
14  
15  
16  
17  
18  
19  
20  
21  
22  
23  
24  
25  
26  
27  
28  
29  
30  
31  
32  
33  
34  
35  
36  
37  
38  
39  
40  
41  
42  
43  
44  
45  
46  
47  
48  
49  
50  
51  
52  
53  
54  
55  
56  
57  
58  
59  
60
46. Greene KE, Wright JR, Steinberg KP, et al. Serial changes in surfactant-associated proteins in lung and serum before and after onset of ARDS. *Am J Respir Crit Care Med* 1999;**160**:1843-50.
47. Christie JD, Shah CV, Kawut SM, et al. Plasma levels of receptor for advanced glycation end products, blood transfusion, and risk of primary graft dysfunction. *Am J Respir Crit Care Med* 2009;**180**:1010-5.
48. Fremont RD, Koyama T, Calfee CS, et al. Acute lung injury in patients with traumatic injuries: utility of a panel of biomarkers for diagnosis and pathogenesis. *J Trauma* 2010;**68**:1121-7.
49. Calfee CS, Ware LB, Eisner MD, et al. Plasma receptor for advanced glycation end products and clinical outcomes in acute lung injury. *Thorax* 2008;**63**:1083-9.
50. McClintock D, Zhuo H, Wickersham N, et al. Biomarkers of inflammation, coagulation and fibrinolysis predict mortality in acute lung injury. *Crit Care* 2008;**12**:R41.
51. Calfee CS, Eisner MD, Parsons PE, et al. Soluble intercellular adhesion molecule-1 and clinical outcomes in patients with acute lung injury. *Intensive Care Med* 2009;**35**:248-57.
52. Agouridakis P, Kyriakou D, Alexandrakis MG, et al. The predictive role of serum and bronchoalveolar lavage cytokines and adhesion molecules for acute respiratory distress syndrome development and outcome. *Respir Res* 2002;**3**:25.
53. Covarrubias M, Ware LB, Kawut SM, et al. Plasma intercellular adhesion molecule-1 and von Willebrand factor in primary graft dysfunction after lung transplantation. *Am J Transplant* 2007;**7**:2573-8.



- 1  
2  
3  
4  
5  
6  
7  
8  
9  
10  
11  
12  
13  
14  
15  
16  
17  
18  
19  
20  
21  
22  
23  
24  
25  
26  
27  
28  
29  
30  
31  
32  
33  
34  
35  
36  
37  
38  
39  
40  
41  
42  
43  
44  
45  
46  
47  
48  
49  
50  
51  
52  
53  
54  
55  
56  
57  
58  
59  
60
54. Bouros D, Alexandrakis MG, Antoniou KM, et al. The clinical significance of serum and bronchoalveolar lavage inflammatory cytokines in patients at risk for acute respiratory distress syndrome. *BMC Pulm Med* 2004;**4**:6.
55. Parsons PE, Eisner MD, Thompson BT, et al. Lower tidal volume ventilation and plasma cytokine markers of inflammation in patients with acute lung injury. *Crit Care Med* 2005;**33**:1-6.
56. Meduri GU, Headley S, Kohler G, et al. Persistent elevation of inflammatory cytokines predicts a poor outcome in ARDS. Plasma IL-1 beta and IL-6 levels are consistent and efficient predictors of outcome over time. *Chest* 1995;**107**:1062-73.
57. Prabhakaran P, Ware LB, White KE, et al. Elevated levels of plasminogen activator inhibitor-1 in pulmonary edema fluid are associated with mortality in acute lung injury. *Am J Physiol Lung Cell Mol Physiol* 2003;**285**:L20-8.
58. Ware LB, Fang X, Matthay MA. Protein C and thrombomodulin in human acute lung injury. *Am J Physiol Lung Cell Mol Physiol* 2003;**285**:L514-21.
59. Christie JD, Robinson N, Ware LB, et al. Association of protein C and type 1 plasminogen activator inhibitor with primary graft dysfunction. *Am J Respir Crit Care Med* 2007;**175**:69-74.
60. Ware LB, Conner ER, Matthay MA. von Willebrand factor antigen is an independent marker of poor outcome in patients with early acute lung injury. *Crit Care Med* 2001;**29**:2325-31.
61. Ware LB, Matthay MA, Parsons PE, et al. Pathogenetic and prognostic significance of altered coagulation and fibrinolysis in acute lung injury/acute respiratory distress syndrome. *Crit Care Med* 2007;**35**:1821-8.

- 1  
2  
3  
4  
5  
6  
7  
8  
9  
10  
11  
12  
13  
14  
15  
16  
17  
18  
19  
20  
21  
22  
23  
24  
25  
26  
27  
28  
29  
30  
31  
32  
33  
34  
35  
36  
37  
38  
39  
40  
41  
42  
43  
44  
45  
46  
47  
48  
49  
50  
51  
52  
53  
54  
55  
56  
57  
58  
59  
60
62. Rubin DB, Wiener-Kronish JP, Murray JF, et al. Elevated von Willebrand factor antigen is an early plasma predictor of acute lung injury in nonpulmonary sepsis syndrome. *J Clin Invest* 1990;**86**:474-80.
63. Ware LB, Eisner MD, Thompson BT, et al. Significance of von Willebrand factor in septic and nonseptic patients with acute lung injury. *Am J Respir Crit Care Med* 2004;**170**:766-72.
64. Matthay MA, Ware LB. Plasma protein C levels in patients with acute lung injury: prognostic significance. *Crit Care Med* 2004;**32**:S229-32.

**Appendix A.** Lung Injury Prevention Study with Aspirin (LIPS-A) Coordinating Center Personnel and Site Investigators

| <b>Coordinating Centers</b>                                    |                                                                                                                              |
|----------------------------------------------------------------|------------------------------------------------------------------------------------------------------------------------------|
| <b>Clinical Coordinating Center</b>                            | Daniel S. Talmor MD, MPH<br>Valerie M. Banner-Goodspeed, ALB                                                                 |
| <b>Data and Statistical Coordinating Center</b>                | Ognjen Gajic, MD, MSc, FCCP, FCCM<br>Daryl J. Kor, MD<br>Rickey E. Carter, PhD<br>Richard Hinds, BS, MS, RRT                 |
| <b>Biospecimen Repository and Knowledge Translation Center</b> | Michelle N. Gong MD, MS<br>Graciela Soto, MD                                                                                 |
| <b>Clinical Sites</b>                                          |                                                                                                                              |
| <b>Beth Israel Deaconess Medical Center</b>                    | Daniel Talmor, MD, MPH<br>Michael Howell MD, MPH                                                                             |
| <b>Bridgeport Hospital</b>                                     | David Kaufman, MD                                                                                                            |
| <b>Brigham and Womens Hospital</b>                             | Peter Hou, MD<br>Bruce D. Levy, MD                                                                                           |
| <b>Duke University Medical Center</b>                          | Ian Welsby, BSc, MBBS<br>Heatherlee Bailey, MD, FAAEM, FCCM                                                                  |
| <b>Harborview Medical Center</b>                               | Timothy R. Watkins, MD MSc                                                                                                   |
| <b>Massachusetts General Hospital</b>                          | Ednan Bajwa, MD, MPH<br>Christopher Kabrhel, MD                                                                              |
| <b>Mayo Clinic – Florida</b>                                   | Emir Festic, MD<br>Augustine Lee, MD                                                                                         |
| <b>Mayo Clinic – Rochester</b>                                 | Ognjen Gajic, MD<br>Daryl Kor, MD<br>Rahul Kashyap, MBBS<br>Leanne Clifford, MBBS                                            |
| <b>Montefiore Medical Center</b>                               | Michelle Gong, MD<br>Graciela Soto, MD                                                                                       |
| <b>University of Florida Medical Center</b>                    | Marie-Carmelle Elie, MD<br>Hassan Alnuaimat, MD                                                                              |
| <b>University of Illinois College of Medicine</b>              | Ruxana Sadikot, MD, MRCP, FCCP                                                                                               |
| <b>University of Louisville Medical Center</b>                 | Ozan Akca, MD, FCCM<br>Rodrigo Cavallazzi, MD<br>Melissa Platt, MD                                                           |
| <b>University of Michigan</b>                                  | Pauline Park, MD<br>Jill Cherry-Bukowiec, MD, MS<br>Lena Napolitano, MD<br>Krishnan Raghavendran, MD<br>John Younger, MD, MS |
| <b>Wake Forest University Medical Center</b>                   | Jason Hoth, MD                                                                                                               |
